# Supplementary material for: Dual-Purpose Poultry in Organic Egg Production and Effects on Egg Quality Parameters
Source: MDPI journal article supplement (doi:10.3390/foods10040897), 2021-04-19
Supplement: s1 [file s1]

Supplementary Table S1. Raw data of egg quality parameters with ATOL (Animal Trait Ontology for Livestock) descriptors, for hen.

|            |     |          |           | ATOL_<br>0001880 | ATOL_<br>0002297 | ATOL_<br>0002119  | ATOL_<br>0002126  | ATOL_<br>0002122 | ATOL_<br>0002074  | ATOL_<br>0002073 | ATOL_<br>0002075 | ATOL_<br>0005600 | ATOL_<br>0005600 | ATOL_<br>0001883 | ATOL_<br>0005587 | ATOL_<br>0001938 | 1881            | ATOL_<br>0002121   | 1881      | ATOL_<br>0001883 | ATOL_<br>0001882 | ATOL_<br>0002125             |
|------------|-----|----------|-----------|------------------|------------------|-------------------|-------------------|------------------|-------------------|------------------|------------------|------------------|------------------|------------------|------------------|------------------|-----------------|--------------------|-----------|------------------|------------------|------------------------------|
| Hen<br>age | Pen | Genotype | Replicate | Egg<br>weight    | Egg<br>diameter  | Shell<br>strength | Shell<br>fracture | Shell<br>modulus | Yolk<br>lightness | Yolk<br>redness  | Yolk<br>yellow   | Blood<br>spot    | Meat spot        | Yolk<br>weight   | Albumen<br>pH    | Albumen<br>DM    | Shell<br>weight | Shell<br>thickness | Shell     | Yolk             | Albumen          | Shell-to-egg-<br>compression |
| wk         | no. |          |           | g                | mm               | N                 | mm                | N/mm             | L*                | a*               | b*               | 1=present        | 1=present        | g                | -                | % (w/w)          | g               | mm                 | % (w/w)   | % (w/w)          | % (w/w)          | %                            |
| 21         | 1   | C        | 1         | 43,659           | 39,967499        | 36,627537         | 0,377499          | 67,562325        | 62,6              | 2,73             | 53,02            |                  |                  | 11,341           | 9,41             | 13,819934        | 3,911           | 0,3691667          | 8,9580613 | 25,976316        | 65,065622        | 0,944514942                  |
| 21         | 1   | C        | 2         | 51,442           | 41,712502        | 55,543613         | 0,432484          | 108,8504         | 63,2              | 2,72             | 53,88            |                  |                  | 9,903            | 9,37             | 13,778934        | 5,242           | 0,4316667          | 10,190117 | 19,250807        | 70,559076        | 1,036821047                  |
| 21         | 1   | C        | 3         | 51,738           | 41,465           | 39,930344         | 0,444984          | 97,590027        | 64,46             | 4,64             | 57,01            |                  |                  | 10,584           | 9,39             | 14,178825        | 4,678           | 0,3875             | 9,0417102 | 20,456918        | 70,501372        | 1,073155673                  |
| 21         | 1   | C        | 4         | 50,807           | 41,712498        | 45,78532          | 0,412498          | 108,8504         | 60,71             | 4,63             | 55,9             |                  | 1                | 11,849           | 9,35             | 14,136825        | 5,124           | 0,425              | 10,085224 | 23,32159         | 66,593186        | 0,988907449                  |
| 21         | 1   | C        | 5         | 55,614           | 43,252499        | 44,133915         | 0,409985          | 105,08691        | 62,85             | 9,36             | 63,9             |                  |                  | 12,135           | 9,47             | 14,198303        | 5,429           | 0,4216667          | 9,7619304 | 21,820045        | 68,418024        | 0,947887427                  |
| 21         | 1   | C        | 6         | 51,352           | 42,25            | 54,792976         | 0,449997          | 101,3435         | 60,22             | 7,18             | 54,1             |                  | 1                | 10,805           | 9,43             | 14,156303        | 5,339           | 0,4375             | 10,396869 | 21,04105         | 68,562081        | 1,065081657                  |
| 21         | 1   | C        | 7         | 55,072           | 42,764999        | 56,894764         | 0,399982          | 120,0879         | 62,81             | 5,84             | 54,91            |                  |                  | 11,983           | 9,46             | 13,725293        | 6,004           | 0,465              | 10,902092 | 21,758788        | 67,33912         | 0,935302255                  |
| 21         | 1   | C        | 8         | 55,096           | 41,919998        | 37,077919         | 0,397488          | 90,083107        | 63,45             | 3,45             | 60,61            |                  | 1                | 12,661           | 9,42             | 13,683293        | 5,216           | 0,3958333          | 9,467112  | 22,97989         | 67,552998        | 0,948206152                  |
| 21         | 1   | C        | 9         | 44,137           | 39,802498        | 51,640297         | 0,449993          | 82,584053        | 62,58             | 4,84             | 55,95            | 1                |                  | 10,69            | 9,5              | 13,318872        | 4,477           | 0,39               | 10,143417 | 24,220042        | 65,636541        | 1,13056472                   |
| 21         | 1   | C        | 10        | 47,574           | 41,195004        | 47,73698          | 0,37999           | 97,590012        | 64,56             | 1,01             | 57,32            |                  |                  | 10,751           | 9,46             | 13,276872        | 5,003           | 0,4391667          | 10,516248 | 22,598478        | 66,885273        | 0,92241768                   |
| 21         | 1   | C        | 11        | 55,693           | 42,294998        | 41,882004         | 0,334991          | 123,85246        | 65,92             | 3,37             | 57,98            |                  | 1                | 12,142           | 9,44             | 13,780947        | 5,576           | 0,4391667          | 10,01203  | 21,801663        | 68,186307        | 0,792034557                  |
| 21         | 1   | C        | 12        | 65,096           | 45,355           | 44,884556         | 0,414997          | 75,06208         | 63,9              | 6,81             | 58               | 1                |                  | 12,462           | 9,4              | 13,738947        | 5,804           | 0,4116667          | 8,9160624 | 19,144033        | 71,939904        | 0,914997244                  |
| 21         | 1   | C        | 13        | 56,322           | 43,149998        | 67,253563         | 0,462486          | 90,074501        | 59,28             | 8,3              | 53,86            |                  |                  | 11,014           | 9,46             | 14,060735        | 6,474           | 0,4975             | 11,49462  | 19,555414        | 68,949966        | 1,071810015                  |
| 21         | 1   | C        | 14        | 51,87            | 41,489998        | 38,278938         | 0,422493          | 86,329628        | 66,43             | 3,69             | 64,49            |                  | 1                | 10,262           | 9,42             | 14,018735        | 4,447           | 0,4691667          | 8,5733565 | 19,784076        | 71,642568        | 1,018300844                  |
| 21         | 1   | C        | 15        | 53,103           | 42,25            | 58,546165         | 0,437485          | 105,09694        | 64,21             | 7,56             | 59,17            |                  |                  | 11,831           | 9,49             |                  | 5,707           | 0,4608333          | 10,747039 | 22,279344        | 66,973617        | 1,035467456                  |
| 21         | 2   | D        | 1         | 51,748           | 41,095001        | 45,78532          | 0,4175            | 82,568283        | 65,22             | 5,99             | 55,69            |                  | 1                | 10,823           | 9,43             | 14,227401        | 5,372           | 0,4316667          | 10,381078 | 20,914818        | 68,704105        | 1,015938654                  |
| 21         | 2   | D        | 2         | 49,046           | 41,1325          | 52,691189         | 0,464985          | 90,083107        | 66,13             | 4,82             | 59,56            |                  |                  | 11,092           | 9,39             | 14,185401        | 5,007           | 0,4275             | 10,208784 | 22,615504        | 67,175713        | 1,130456452                  |
| 21         | 2   | D        | 3         | 67,801           | 44,212498        | 39,780216         | 0,409988          | 52,54847         | 57,37             | 9,46             | 65,845           |                  |                  | 22,409           | 9,44             | 13,623585        | 6,15            | 0,3858333          | 9,0706627 |                  |                  | 0,927312454                  |
| 21         | 2   | D        | 4         | 51,433           | 40,677502        | 48,037235         | 0,429989          | 63,808853        | 56,81             | 4,87             | 57,87            |                  |                  | 11,381           | 9,4              | 13,581585        | 5,152           | 0,4116667          | 10,016915 | 22,127817        | 67,855268        | 1,057068352                  |
| 21         | 2   | D        | 5         | 51,508           | 41,599998        | 55,843868         | 0,469997          | 97,580727        | 68,93             | 5,02             | 60,65            |                  |                  | 11,146           | 9,45             | 14,567662        | 5,626           | 0,4366667          | 10,922575 | 21,639357        | 67,438068        | 1,129800535                  |
| 21         | 2   | D        | 6         | 49,417           | 40,862499        | 49,388382         | 0,414997          | 75,076401        | 66,45             | 6,08             | 62,13            |                  |                  | 11,656           | 9,41             | 14,525662        | 5,457           | 0,4508333          | 11,042759 | 23,587025        | 65,370217        | 1,015593784                  |
| 21         | 2   | D        | 7         | 49,583           | 41,087502        | 57,044891         | 0,409996          | 101,3435         | 64,57             | 6,57             | 58,65            |                  |                  | 10,905           |                  | 13,518192        | 5,623           | 0,46               | 11,34058  | 21,993425        | 66,665994        | 0,997860615                  |
| 21         | 2   | D        | 8         | 65,352           | 43,555           | 47,887108         | 0,474995          | 86,329628        | 51,65             | 6,42             | 64,93            |                  |                  |                  |                  | 13,560192        | 6,125           | 0,4383333          | 9,3723222 |                  |                  | 1,090563655                  |
| 21         | 2   | D        | 9         | 50,337           | 41,005001        | 60,497826         | 0,454998          | 75,076401        | 68,64             | 5,14             | 60,61            |                  |                  | 10,19            | 9,39             | 14,216362        | 5,78            | 0,4758333          | 11,482607 | 20,243558        | 68,273834        | 1,109615873                  |
| 21         | 2   | D        | 10        | 57,602           | 43,105           | 52,991444         | 0,432491          | 90,074501        | 65,05             | 10,03            | 59,81            |                  |                  | 12,792           | 9,35             | 14,174362        | 6,097           | 0,4608333          | 10,584702 | 22,207562        | 67,207736        | 1,003343                     |
| 21         | 2   | D        | 11        | 52,363           | 41,014999        | 52,090679         | 0,419998          | 90,083099        | 55,59             | 7,44             | 53,16            |                  |                  | 10,825           | 9,42             | 13,276153        | 5,838           | 0,4566667          | 11,149094 | 20,672994        | 68,177912        | 1,024010753                  |
| 21         | 2   | D        | 12        | 63,952           | 43,612499        | 47,887108         | 0,422489          | 82,568291        | 55,965            | 11,765           | 59,23            |                  |                  | 16,964           | 9,38             | 13,234153        | 6,534           | 0,4625             | 10,217038 |                  |                  | 0,968733757                  |
| 21         | 2   | D        | 13        | 48,638           | 40,532501        | 54,342594         | 0,37249           | 97,590027        | 65,64             | 4,62             | 59,22            |                  |                  | 10,485           | 9,47             | 14,000216        | 5,273           | 0,46               | 10,841317 | 21,557219        | 67,601464        | 0,918990911                  |
| 21         | 2   | D        | 14        | 49,077           | 41,362499        | 46,235703         | 0,422489          | 90,074509        | 62,53             | 7,85             | 56,09            |                  | 1                | 10,123           | 9,43             | 13,958216        | 5,023           | 0,4625             | 10,234937 | 20,62677         | 69,138293        | 1,021430064                  |
| 21         | 2   | D        | 15        | 51,67            | 40,959999        | 49,988892         | 0,437489          | 90,091675        | 60,66             | 5,76             | 59,92            |                  |                  | 11,131           | 9,36             |                  | 5,245           | 0,4791667          | 10,150958 | 21,542481        | 68,306561        | 1,068088405                  |
| 21         | 3   | B        | 1         | 63,961           | 43,940002        | 48,487617         | 0,437492          | 67,562325        | 60,37             | 4,77             | 57,98            |                  | 1                | 12,868           | 9,44             | 13,908043        | 6,116           | 0,4425             | 9,5620769 | 20,11851         | 70,319413        | 0,99565767                   |
| 21         | 3   | B        | 2         | 52,111           | 42,762501        | 45,184811         | 0,439987          | 86,304947        | 68,33             | 0,79             | 56,29            |                  |                  | 10,87            | 9,4              | 13,866043        | 4,837           | 0,4008333          | 9,2821093 | 20,85932         | 69,858571        | 1,028908482                  |
| 21         | 3   | B        | 3         | 52,86            | 42,735001        | 40,530853         | 0,450001          | 78,830238        | 56,75             | 2,87             | 54,38            | 1                |                  | 10,525           | 9,37             | 14,320803        | 4,348           | 0,3675             | 8,2255013 | 19,911086        | 71,863413        | 1,053003368                  |
| 21         | 3   | B        | 4         | 52,094           | 41,959999        | 46,535957         | 0,442486          | 101,35313        |                   |                  |                  |                  |                  |                  |                  | 14,278803        | 4,825           | 0,405              | 9,2621031 |                  |                  | 1,054542446                  |
| 21         | 3   | B        | 5         | 48,411           | 41,102501        | 44,734428         | 0,40749           | 105,09694        | 59,03             | 5,31             | 60,1             | 1                |                  | 8,992            | 9,45             |                  | 4,905           | 0,42               | 10,131995 | 18,574291        | 71,293714        | 0,991399526                  |
| 21         | 3   | B        | 6         | 51,333           | 41,772499        | 42,032131         | 0,459991          | 90,065918        | 62,43             | 0,43             | 59,89            | 1                |                  | 13,224           | 9,47             | 13,374674        | 4,554           | 0,3991667          | 8,8714862 | 25,761206        | 65,367308        | 1,101181426                  |
| 21         | 3   | B        | 7         | 57,849           | 42,887501        | 47,586853         | 0,457493          | 75,0084          | 68                | 1,87             | 66,6             |                  |                  | 11,601           | 9,46             | 13,364674        | 5,892           | 0,4425             | 10,185137 | 20,053934        | 69,760929        | 1,066728043                  |
| 21         | 3   | B        | 8         | 56,701           | 42,802498        | 51,49017          | 0,447495          | 93,836563        | 62,84             | 3,5              | 59,56            |                  |                  | 12,615           | 9,48             | 13,893452        | 5,858           | 0,445              | 10,331387 | 22,248285        | 67,420328        | 1,045488046                  |
| 21         | 3   | B        | 9         | 57,177           | 42,684998        | 36,327282         | 0,432487          | 82,584038        | 67,46             | 5,4              | 65,67            |                  |                  | 12,347           | 9,44             | 13,851452        | 5,151           | 0,405              | 9,0088672 | 21,594347        | 69,396785        | 1,013206092                  |
| 21         | 3   | B        | 10        | 50,25            | 41,737499        | 39,479961         | 0,407494          | 90,065926        | 61,95             | 3,6              | 54,41            |                  |                  | 12,696           | 9,51             | 13,848993        | 4,671           | 0,395              | 9,2955224 | 25,265672        | 65,438806        | 0,976325869                  |
| 21         | 3   | B        | 11        | 54,702           | 41,329998        | 31,222942         | 0,372486          | 78,807678        | 59,18             | 5,14             | 57,27            |                  |                  | 13,178           | 9,47             | 13,806993        | 4,638           | 0,3783333          | 8,4786662 | 24,090527        | 67,430807        | 0,901248531                  |
| 21         | 3   | B        | 12        | 50,239           | 40,032501        | 37,528301         | 0,409992          | 56,301926        | 59,52             | 6,05             | 56,48            | 1                |                  | 11,314           | 9,45             | 13,901446        | 4,604           | 0,3941667          | 9,1641951 | 22,520353        | 68,315452        | 1,024147854                  |
| 21         | 3   | B        | 13        | 53,161           | 41,889999        | 49,088127         | 0,484997          | 105,08692        | 67,38             | 1,2              | 57,98            | 1                |                  | 11,68            | 9,45             | 13,859446        | 5,33            | 0,4191667          | 10,026147 | 21,970994        | 68,002859        | 1,157787089                  |
| 21         | 3   | B        | 14        | 49,651           | 40,137501        | 41,731876         | 0,389992          | 67,562317        | 62,03             | 5,56             | 58,99            |                  |                  | 11,327           | 9,4              | 13,102005        | 4,583           | 0,4091667          | 9,2304284 | 22,813236        | 67,956335        | 0,971639963                  |
| 21         | 3   | B        | 15        | 47,858           | 39,915001        | 33,624985         | 0,374992          | 63,797607        | 62,97             | 4,95             | 55,57            |                  |                  | 11,118           | 9,42             | 13,122005        | 4,507           | 0,4075             | 9,4174433 | 23,231226        | 67,351331        | 0,939476364                  |

Supplementary Table S1. Raw data of egg quality parameters with ATOL (Animal Trait Ontology for Livestock) descriptors, for hen.

| Hen<br>age | Pen | Genotype | Replicate | ATOL_<br>0001880 | ATOL_<br>0002297 | ATOL_<br>0002119  | ATOL_<br>0002126  | ATOL_<br>0002122 | ATOL_<br>0002074  | ATOL_<br>0002073 | ATOL_<br>0002075 | ATOL_<br>0005600 | ATOL_<br>0005600 | ATOL_<br>0001883 | ATOL_<br>0005587 | ATOL_<br>0001938 | ATOL_<br>1881   | ATOL_<br>0002121   | ATOL_<br>1881 | ATOL_<br>0001883 | ATOL_<br>0001882 | ATOL_<br>0002125             |
|------------|-----|----------|-----------|------------------|------------------|-------------------|-------------------|------------------|-------------------|------------------|------------------|------------------|------------------|------------------|------------------|------------------|-----------------|--------------------|---------------|------------------|------------------|------------------------------|
|            |     |          |           | Egg<br>weight    | Egg<br>diameter  | Shell<br>strength | Shell<br>fracture | Shell<br>modulus | Yolk<br>lightness | Yolk<br>redness  | Yolk<br>yellow   | Blood<br>spot    | Meat spot        | Yolk<br>weight   | Albumen<br>pH    | Albumen<br>DM    | Shell<br>weight | Shell<br>thickness | Shell         | Yolk             | Albumen          | Shell-to-egg-<br>compression |
|            |     |          |           | g                | mm               | N                 | mm                | N/mm             | L*                | a*               | b*               | 1=present        | 1=present        | g                | -                | % (w/w)          | g               | mm                 | % (w/w)       | % (w/w)          | % (w/w)          | %                            |
| 21         | 4   | A        | 1         | 47,772           | 39,369999        |                   | 0,174999          | 75,069244        | 59,34             | 6,22             | 58,6             |                  |                  | 10,156           | 9,45             | 13,878889        | 4,81            | 0,4325             | 10,068659     | 21,259315        | 68,672025        | 0,44449836                   |
| 21         | 4   | A        | 2         | 52,462           | 40,584999        | 40,380726         | 0,37249           | 75,062096        | 65,21             | 2,19             | 53,97            |                  |                  | 12,861           | 9,47             | 13,898889        | 5,598           | 0,4741667          | 10,670581     | 24,514887        | 64,814532        | 0,917802166                  |
| 21         | 4   | A        | 3         | 52,24            | 41,592499        | 63,95076          | 0,487492          | 93,827606        | 65,07             | 2,85             | 57,65            |                  |                  | 12,001           | 9,44             | 13,192437        | 6,199           | 0,5066667          | 11,866386     | 22,972818        | 65,160796        | 1,172067108                  |
| 21         | 4   | A        | 4         | 44,864           | 38,619999        | 53,291702         | 0,487495          | 63,808853        | 59,72             | 14,75            | 64,88            | 1                |                  | 10,38            | 9,46             | 13,212437        | 4,902           | 0,4433333          | 10,926355     | 23,136591        | 65,937054        | 1,262286413                  |
| 21         | 4   | A        | 5         | 47,899           | 39,825001        | 44,584301         | 0,454998          | 56,291187        | 66,14             | 4,35             | 64,07            |                  |                  | 11,799           | 9,44             | 13,298373        | 4,72            | 0,4191667          | 9,8540679     | 24,633082        | 65,51285         | 1,14249338                   |
| 21         | 4   | A        | 6         | 49,941           | 40,547501        | 48,938            | 0,4925            | 67,549438        | 62,29             | 4,32             | 61,95            |                  | 1                | 11,836           | 9,46             | 13,318373        | 5,183           | 0,4183333          | 10,378246     | 23,699966        | 65,921788        | 1,214624793                  |
| 21         | 4   | A        | 7         | 51,009           | 40,924999        | 32,874344         | 0,372486          | 82,584038        | 56,8              | 8,83             | 51,38            |                  |                  | 12,487           | 9,42             | 13,93247         | 5,204           | 0,4475             | 10,202121     | 24,479994        | 65,317885        | 0,910167402                  |
| 21         | 4   | A        | 8         | 50,621           | 41,209999        | 44,584301         | 0,377487          | 82,576172        | 64,5              | 2,66             | 60,89            |                  |                  | 12,528           | 9,44             | 13,95247         | 5,402           | 0,44               | 10,67146      | 24,748622        | 64,579917        | 0,916008273                  |
| 21         | 4   | A        | 9         | 58,372           | 43,3325          | 55,543613         | 0,457489          | 75,069244        | 70,35             | 0,56             | 61,49            |                  |                  | 11,869           | 9,41             | 14,793815        | 6,133           | 0,4725             | 10,50675      | 20,333379        | 69,159871        | 1,055764149                  |
| 21         | 4   | A        | 10        | 57,783           | 42,654999        | 54,943104         | 0,439999          | 82,57618         | 42,95             | 10,67            | 42,15            |                  |                  | 11,048           | 9,37             | 14,844374        | 6,533           | 0,4858333          | 11,306093     | 19,11981         | 69,574096        | 1,031529739                  |
| 21         | 4   | A        | 11        | 50,687           | 40,57            | 36,927792         | 0,412491          | 63,821037        | 62,02             | 3,36             | 59,5             |                  |                  | 12,574           | 9,49             | 13,599918        | 4,975           | 0,3983333          | 9,81514       | 24,80715         | 65,37771         | 1,01673897                   |
| 21         | 4   | A        | 12        | 52,243           | 41,782501        | 46,836212         | 0,442486          | 93,836555        | 50,75             | 8,74             | 54,66            |                  |                  | 12,541           | 9,52             | 14,300622        | 5,498           | 0,4391667          | 10,523898     | 24,00513         | 65,470972        | 1,059022293                  |
| 21         | 4   | A        | 13        | 51,462           | 42,177498        | 37,077919         | 0,394989          | 82,514282        | 59,43             | 6,94             | 52,69            | 1                | 1                | 9,309            | 9,33             | 14,787362        | 4,861           | 0,405              | 9,4458047     | 18,089075        | 72,46512         | 0,93649225                   |
| 21         | 4   | A        | 14        | 49,529           | 41,362499        | 53,141575         | 0,465             | 82,57618         | 65,05             | 0,24             | 59,97            |                  |                  | 11,41            | 9,47             | 14,188303        | 5,158           | 0,4508333          | 10,414101     | 23,037009        | 66,548891        | 1,124206736                  |
| 21         | 4   | A        | 15        | 51,117           | 40,369999        | 36,777664         | 0,429993          | 45,045837        | 61,48             | 9,28             | 60,34            |                  |                  | 12,289           | 9,48             |                  | 4,956           | 0,4041667          | 9,6954047     | 24,040926        | 66,26367         | 1,065130073                  |
| 21         | 5   | B        | 1         | 56,209           | 42,162498        | 31,523197         | 0,362492          | 86,313164        |                   |                  |                  |                  |                  |                  | 9,44             |                  | 5,109           | 0,4266667          | 9,0892918     |                  |                  | 0,859749818                  |
| 21         | 5   | B        | 2         | 48,039           | 40,837498        | 23,266178         | 0,24749           | 86,329628        | 64,31             | 1,24             | 56,65            |                  |                  | 9,899            | 9,48             | 13,294728        | 4,749           | 0,4233333          | 9,8857179     | 20,606174        | 69,508108        | 0,606036148                  |
| 21         | 5   | B        | 3         | 51,312           | 41,630001        | 40,080471         | 0,464985          | 82,576164        | 60,56             | 8,98             | 54,18            |                  |                  | 9,933            | 9,44             | 13,252728        | 4,467           | 0,3775             | 8,7055659     | 19,358045        | 71,936389        | 1,116946886                  |
| 21         | 5   | B        | 4         | 49,965           | 40,375           | 41,131363         | 0,457493          | 60,043945        | 56,48             | 7,02             | 66,21            | 1                |                  | 10,409           | 9,48             | 13,716571        | 4,677           | 0,4283333          | 9,3605524     | 20,832583        | 69,806865        | 1,133109598                  |
| 21         | 5   | B        | 5         | 53,919           | 42,822498        | 18,612223         | 0,279991          | 67,568771        | 62,99             | 8,08             | 58,94            | 1                |                  | 10,485           | 9,44             | 13,674571        | 4,04            | 0,3433333          | 7,4927206     | 19,445835        | 73,061444        | 0,653840885                  |
| 21         | 5   | B        | 6         | 52,964           | 42,099998        | 29,871794         | 0,404984          | 75,076393        | 60,06             | 5,05             | 55,12            |                  |                  | 11,849           | 9,51             | 14,22865         | 4,223           | 0,36               | 7,9733404     | 22,3718          | 69,65486         | 0,96195729                   |
| 21         | 5   | B        | 7         | 51,358           | 42,232502        | 38,429066         | 0,449993          | 71,30217         | 53,54             | 9,84             | 65,11            |                  |                  | 11,871           | 9,47             | 14,18665         | 4,373           | 0,3475             | 8,5147397     | 23,114218        | 68,371042        | 1,065513476                  |
| 21         | 5   | B        | 8         | 53,341           | 41,610001        |                   |                   |                  | 56,42             | 5,05             | 49,17            | 1                |                  | 12,47            | 9,39             | 12,955677        | 4,243           | 0,3416667          | 7,9544815     | 23,377889        | 68,667629        |                              |
| 21         | 5   | B        | 9         | 48,634           | 40,890003        | 45,935448         | 0,467499          | 82,591927        | 62,9              | 2,28             | 57,54            |                  |                  | 10,432           | 9,35             | 12,913677        | 4,653           | 0,4041667          | 9,5673808     | 21,450014        | 68,982605        | 1,143308794                  |
| 21         | 5   | B        | 10        | 50,061           | 40,862499        | 36,177155         | 0,482498          | 71,287659        | 60,3              | 6,69             | 55,38            |                  |                  | 10,345           | 9,35             | 13,671255        | 4,208           | 0,3875             | 8,405745      | 20,664789        | 70,929466        | 1,180784367                  |
| 21         | 5   | B        | 11        | 51,941           | 41,75            | 28,370518         | 0,347488          | 82,568291        | 57,2              | 8,7              | 54,96            |                  | 1                | 8,883            | 9,31             | 13,629255        | 4,44            | 0,3858333          | 8,5481604     | 17,102097        | 74,349743        | 0,832306587                  |
| 21         | 5   | B        | 12        | 50,981           | 42,322498        | 34,826004         | 0,402489          | 86,321396        | 58,67             | 9,37             | 56,69            |                  |                  | 11,734           | 9,45             | 13,789606        | 4,378           | 0,3533333          | 8,587513      | 23,016418        | 68,396069        | 0,95100483                   |
| 21         | 5   | B        | 13        | 55,582           | 42,322498        | 29,871794         | 0,414986          | 71,308975        | 55,81             | 4,66             | 57,94            |                  | 1                | 11,912           | 9,41             | 13,747606        | 4,365           | 0,36               | 7,8532618     | 21,431399        | 70,715339        | 0,98053286                   |
| 21         | 5   | B        | 14        | 54,883           | 42,255001        |                   |                   |                  | 65,45             | 6,48             | 62,11            |                  | 1                | 11,994           | 9,3              | 14,512781        | 4,279           | 0,3375             | 7,7965855     | 21,853762        | 70,349653        |                              |
| 21         | 5   | B        | 15        | 54,789           | 43,084999        |                   |                   |                  | 55,98             | 11,44            | 47,03            |                  | 1                | 10,53            | 9,3              | 14,470781        | 4,592           | 0,385              | 8,3812444     | 19,219186        | 72,399569        |                              |
| 21         | 6   | C        | 1         | 52,505           | 42,182499        | 46,38583          | 0,422485          | 82,568283        | 65,08             | 3,98             | 61,96            |                  |                  | 11,62            | 9,51             | 14,090264        | 5,119           | 0,4075             | 9,7495477     | 22,131226        | 68,119227        | 1,001564654                  |
| 21         | 6   | C        | 2         | 44,438           | 39,0275          | 46,686085         | 0,439999          | 71,30899         | 51,29             | 11,37            | 41,74            |                  | 1                | 9,331            | 9,47             | 14,048264        | 4,62            | 0,4216667          | 10,396507     | 20,997795        | 68,605698        | 1,127407597                  |
| 21         | 6   | C        | 3         | 48,704           | 41,16            | 46,085575         | 0,452492          | 82,568298        | 64,73             | 7,22             | 63               |                  |                  | 12,176           | 9,46             | 13,59219         | 4,62            | 0,3958333          | 9,4858739     | 25               | 65,514126        | 1,099348882                  |
| 21         | 6   | C        | 4         | 44,171           | 39,485001        | 46,235703         | 0,425003          | 60,049667        | 61,64             | 10,08            | 66,07            | 1                |                  | 10,511           | 9,42             | 13,55019         | 4,528           | 0,4166667          | 10,25107      | 23,796156        | 65,952774        | 1,076365681                  |
| 21         | 6   | C        | 5         | 47,743           | 41,3325          | 54,192467         | 0,427486          | 90,09169         | 58,43             | 2,21             | 61,46            |                  |                  | 10,902           | 9,42             | 14,306714        | 5,363           | 0,4416667          | 11,23306      | 22,834761        | 65,932179        | 1,034261175                  |
| 21         | 6   | C        | 6         | 52,673           | 41,095001        | 49,088127         | 0,444996          | 78,822723        | 61,29             | 3,29             | 52,63            |                  |                  | 9,25             | 9,38             | 14,264714        | 5,457           | 0,4291667          | 10,360147     | 17,561179        | 72,078674        | 1,082847035                  |
| 21         | 6   | C        | 7         | 61,02            | 43,309998        | 47,586853         | 0,459991          | 78,830215        | 63,71             | 3,31             | 57,76            |                  |                  | 12,128           | 9,49             | 13,957098        | 5,994           | 0,4291667          | 9,8230088     | 19,875451        | 70,30154         | 1,062089636                  |
| 21         | 6   | C        | 8         | 47,632           | 40,9025          | 48,487617         | 0,452496          | 75,069244        | 62,31             | 3,58             | 56,26            |                  |                  | 10,256           | 9,45             | 13,915098        | 4,805           | 0,425              | 10,087756     | 21,531743        | 68,380501        | 1,106279567                  |
| 21         | 6   | C        | 9         | 55,272           | 43,224998        | 46,98634          | 0,467499          | 67,568764        | 57,43             | 3,07             | 53,83            |                  |                  | 12,502           |                  | 13,021703        | 5,708           | 0,4291667          | 10,32711      | 22,619048        | 67,053843        | 1,081547765                  |
| 21         | 6   | C        | 10        | 54,89            | 41,794998        | 45,78532          | 0,424988          | 93,827599        | 58,99             | 4,77             | 52,47            |                  | 1                | 10,131           |                  | 12,979703        | 5,609           | 0,4258333          | 10,218619     | 18,456914        | 71,324467        | 1,016839384                  |
| 21         | 6   | C        | 11        | 47,777           | 40,485001        | 48,187363         | 0,454994          | 56,307301        | 61,37             | 4,19             | 54,34            |                  |                  | 9,357            | 9,48             | 13,823528        | 4,679           | 0,4008333          | 9,7934152     | 19,584737        | 70,621847        | 1,123858191                  |
| 21         | 6   | C        | 12        | 47,109           | 40,380001        | 44,734428         | 0,432491          | 56,301926        | 60,56             | 6,52             | 57,77            |                  |                  | 11,748           | 9,44             | 13,781528        | 4,513           | 0,3916667          | 9,5799104     | 24,93791         | 65,48218         | 1,071052475                  |
| 21         | 6   | C        | 13        | 50,511           | 41,327499        | 51,189915         | 0,407494          | 93,836555        | 60,86             | 6,7              | 57,36            |                  | 1                | 10,624           | 9,45             | 13,668059        | 5,391           | 0,4391667          | 10,672923     | 21,033042        | 68,294035        | 0,986011759                  |
| 21         | 6   | C        | 14        | 44,608           | 39,067501        | 46,085575         | 0,39249           | 56,301926        | 62,18             | 2,16             | 58,33            |                  |                  | 9,857            | 9,41             | 13,626059        | 4,863           | 0,4458333          | 10,901632     | 22,096933        | 67,001435        | 1,00464578                   |
| 21         | 6   | C        | 15        | 55,497           | 42,66            | 44,734428         | 0,457497          | 78,815186        | 59,81             | 3,05             | 54,69            |                  |                  | 11,484           | 9,42             |                  | 5,34            | 0,4283333          | 9,6221417     | 20,69301         | 69,684848        | 1,07242616                   |

Supplementary Table S1. Raw data of egg quality parameters with ATOL (Animal Trait Ontology for Livestock) descriptors, for hen.

|            |     |          |           | ATOL_<br>0001880 | ATOL_<br>0002297 | ATOL_<br>0002119  | ATOL_<br>0002126  | ATOL_<br>0002122 | ATOL_<br>0002074  | ATOL_<br>0002073 | ATOL_<br>0002075 | ATOL_<br>0005600 | ATOL_<br>0005600 | ATOL_<br>0001883 | ATOL_<br>0005587 | ATOL_<br>0001938 | ATOL_<br>1881   | ATOL_<br>0002121   | ATOL_<br>1881 | ATOL_<br>0001883 | ATOL_<br>0001882 | ATOL_<br>0002125             |
|------------|-----|----------|-----------|------------------|------------------|-------------------|-------------------|------------------|-------------------|------------------|------------------|------------------|------------------|------------------|------------------|------------------|-----------------|--------------------|---------------|------------------|------------------|------------------------------|
| Hen<br>age | Pen | Genotype | Replicate | Egg<br>weight    | Egg<br>diameter  | Shell<br>strength | Shell<br>fracture | Shell<br>modulus | Yolk<br>lightness | Yolk<br>redness  | Yolk<br>yellow   | Blood<br>spot    | Meat spot        | Yolk<br>weight   | Albumen<br>pH    | Albumen<br>DM    | Shell<br>weight | Shell<br>thickness | Shell         | Yolk             | Albumen          | Shell-to-egg-<br>compression |
| wk         | no. |          |           | g                | mm               | N                 | mm                | N/mm             | L*                | a*               | b*               | 1=present        | 1=present        | g                | -                | % (w/w)          | g               | mm                 | % (w/w)       | % (w/w)          | % (w/w)          | %                            |
| 21         | 7   | A        | 1         | 54,315           | 41,952499        | 40,831108         | 0,407482          | 86,329628        | 52,23             | 2,79             | 62,45            |                  |                  | 12,435           | 9,5              | 14,525597        | 5,605           | 0,4475             | 10,319433     | 22,894228        | 66,786339        | 0,971293748                  |
| 21         | 7   | A        | 2         | 47,646           | 40,274998        | 47,887108         | 0,472496          | 56,301941        | 61,25             | 5,25             | 57,29            |                  | 1                | 10,745           | 9,46             | 14,483597        | 4,883           | 0,4141667          | 10,248499     | 22,551736        | 67,199765        | 1,173174484                  |
| 21         | 7   | A        | 3         | 49,414           | 39,952499        | 58,396038         | 0,472496          | 63,814945        | 64,88             | 3,52             | 63,73            |                  |                  | 11,793           | 9,46             | 14,080269        | 5,429           | 0,4633333          | 10,986765     | 23,865706        | 65,147529        | 1,18264442                   |
| 21         | 7   | A        | 4         | 50,22            | 40,904999        | 53,892212         | 0,467495          | 86,329636        | 65,58             | 4,77             | 63,49            |                  |                  | 10,544           | 9,42             | 14,038269        | 5,092           | 0,4308333          | 10,139387     | 20,995619        | 68,864994        | 1,142879871                  |
| 21         | 7   | A        | 5         | 53,421           | 41,220001        | 39,029579         | 0,442497          | 82,576172        | 58,44             | 4,22             | 74,18            |                  |                  | 12,89            | 9,46             | 14,361813        | 4,62            | 0,375              | 8,6482844     | 24,129088        | 67,222628        | 1,073500702                  |
| 21         | 7   | A        | 6         | 55,663           | 42,645           | 47,586853         | 0,445             | 78,830215        | 60,53             | 3,99             | 57,95            |                  |                  | 12,77            | 9,42             | 14,319813        | 5,459           | 0,4375             | 9,8072328     | 22,941631        | 67,251136        | 1,043498652                  |
| 21         | 7   | A        | 7         | 51,003           | 40,577503        | 57,044891         | 0,469994          | 56,301926        | 65,02             | 7,52             | 59,36            |                  |                  | 10,99            | 9,5              | 14,162995        | 6,933           | 0,4925             | 13,593318     | 21,547752        | 64,85893         | 1,158262498                  |
| 21         | 7   | A        | 8         | 54,113           | 41,264999        | 44,284042         | 0,412483          | 86,313164        | 63,84             | 4,41             | 60,94            |                  |                  | 13,479           | 9,46             | 14,120995        | 5,742           | 0,4508333          | 10,611129     | 24,908987        | 64,479885        | 0,999595323                  |
| 21         | 7   | A        | 9         | 50,444           | 41,4375          | 65,452034         | 0,474995          | 101,3145         | 57,85             | 5,13             | 55,2             |                  | 1                | 11,992           | 9,5              | 13,968368        | 5,714           | 0,4716667          | 11,327413     | 23,772897        | 64,899691        | 1,146292609                  |
| 21         | 7   | A        | 10        | 52,619           | 41,380001        | 53,591957         | 0,472492          | 75,069252        | 57,78             | 5,7              | 60,54            |                  |                  | 11,174           | 9,46             | 13,926368        | 5,506           | 0,4583333          | 10,463901     | 21,235675        | 68,300424        | 1,141836608                  |
| 21         | 7   | A        | 11        | 47,605           | 40,059998        | 59,146679         | 0,462486          | 71,308983        | 60,74             | 4,84             | 54,85            |                  | 1                | 10,727           | 9,5              | 14,463962        | 5,505           | 0,4591667          | 11,563911     | 22,533347        | 65,902741        | 1,154483333                  |
| 21         | 7   | A        | 12        | 52,489           | 40,967499        | 46,085575         | 0,404987          | 97,590019        | 63,8              | 6,76             | 58,73            |                  |                  | 11,996           | 9,46             | 14,421962        | 5,692           | 0,4466667          | 10,844177     | 22,854312        | 66,301511        | 0,988556807                  |
| 21         | 7   | A        | 13        | 47,045           | 40,612499        | 52,541061         | 0,43499           | 63,814938        | 67,21             | 3,56             | 66,02            |                  |                  | 11,784           | 9,47             | 14,629637        | 4,963           | 0,4433333          | 10,549474     | 25,048358        | 64,402168        | 1,071074203                  |
| 21         | 7   | A        | 14        | 51,7             | 41,412498        | 51,940552         | 0,417492          | 101,34347        | 64,73             | 7,8              | 62,61            | 1                |                  | 12,604           | 9,43             | 14,587637        | 5,761           | 0,4691667          | 11,143133     | 24,37911         | 64,477756        | 1,008130444                  |
| 21         | 7   | A        | 15        | 53,251           | 41,282501        | 50,139019         | 0,442497          | 82,57618         | 56,63             | 4,35             | 60,99            |                  |                  | 12,356           | 9,47             |                  | 5,688           | 0,46               | 10,68149      | 23,20332         | 66,11519         | 1,071875466                  |
| 21         | 8   | D        | 1         | 52,139           | 41,130001        | 55,993996         | 0,440002          | 90,091698        | 65,03             | 6,8              | 60,9             |                  |                  | 11,035           | 9,33             | 13,873243        | 5,838           | 0,48               | 11,196993     | 21,164579        | 67,638428        | 1,069783587                  |
| 21         | 8   | D        | 2         | 52,863           | 41,947498        | 57,044891         | 0,434998          | 93,845505        | 65,69             | 5,07             | 58,86            |                  |                  | 11,702           | 9,29             | 13,831243        | 5,598           | 0,4383333          | 10,589637     | 22,136466        | 67,273897        | 1,03700583                   |
| 21         | 8   | D        | 3         | 49,663           | 41,432499        | 58,245911         | 0,417492          | 105,09694        | 61,5              | 1,53             | 54,3             |                  |                  | 10,877           | 9,39             | 14,234879        | 5,82            | 0,4933333          | 11,718986     | 21,901617        | 66,379397        | 1,007643782                  |
| 21         | 8   | D        | 4         | 53,052           | 41,720001        | 62,149231         | 0,452488          | 108,86079        | 65                | 3,37             | 59,45            |                  |                  | 12,149           | 9,35             | 14,192879        | 5,891           | 0,4858333          | 11,1042       | 22,900173        | 65,995627        | 1,084582908                  |
| 21         | 8   | D        | 5         | 51,28            | 41,605           | 60,197571         | 0,422489          | 101,33381        | 64,66             | 4,31             | 60,18            |                  | 1                | 10,64            | 9,42             | 14,429233        | 6,24            | 0,5333333          | 12,168487     | 20,74883         | 67,082683        | 1,015476505                  |
| 21         | 8   | D        | 6         | 52,776           | 42,0275          | 56,294254         | 0,452488          | 90,083092        | 64,75             | 0,44             | 52,93            |                  |                  | 11,597           | 9,38             | 14,387233        | 5,679           | 0,5058333          | 10,760573     | 21,974003        | 67,265424        | 1,076647433                  |
| 21         | 8   | D        | 7         | 52,021           | 41,9925          | 37,378174         | 0,3825            | 86,329643        | 52,9              | 8,97             | 51,76            |                  |                  | 10,975           | 9,45             | 14,711886        | 5,194           | 0,4383333          | 9,9844294     | 21,097249        | 68,918321        | 0,910876942                  |
| 21         | 8   | D        | 8         | 50,1             | 41,3825          | 60,79808          | 0,439991          | 97,590019        | 58,11             | 3,71             | 62,59            |                  |                  | 10,314           | 9,41             | 14,669886        | 5,622           | 0,46               | 11,221557     | 20,586826        | 68,191617        | 1,063229626                  |
| 21         | 8   | D        | 9         | 51,349           | 40,9375          | 52,390934         | 0,484997          | 71,322578        | 65,53             | 7,71             | 63,42            |                  |                  | 11,8             | 9,45             | 13,799502        | 5,467           | 0,4466667          | 10,646751     | 22,98            | 66,37325         | 1,184725496                  |
| 21         | 8   | D        | 10        | 52,479           | 42,037498        | 55,393486         | 0,432487          | 90,09169         | 56,87             | 6,89             | 49,07            |                  |                  | 11,836           | 9,41             | 13,757502        | 5,912           | 0,4708333          | 11,265459     | 22,553783        | 66,180758        | 1,028812419                  |
| 21         | 8   | D        | 11        | 50,083           | 41,075001        | 56,294254         | 0,447495          | 101,34348        | 64,84             | 3,56             | 56,47            |                  |                  | 11,351           | 9,49             | 13,866122        | 5,631           | 0,4625             | 11,243336     | 22,664377        | 66,092287        | 1,089458281                  |
| 21         | 8   | D        | 12        | 52,912           | 42,705002        | 45,78532          | 0,387493          | 78,822723        | 63,76             | 4,52             | 56,61            |                  |                  | 12,564           | 9,45             | 13,824122        | 5,862           | 0,465              | 11,078772     | 23,745086        | 65,176142        | 0,90737146                   |
| 21         | 8   | D        | 13        | 54,113           | 42,392498        | 57,195019         | 0,444996          | 101,33382        | 48                | 7,33             | 48,36            |                  |                  | 10,799           | 9,42             | 13,371126        | 5,795           | 0,4608333          | 10,709072     | 19,956388        | 69,334541        | 1,049704596                  |
| 21         | 8   | D        | 14        | 52,402           | 41,862499        | 60,497826         | 0,469997          | 112,60385        | 60,73             | 6,96             | 57,75            |                  |                  | 12,295           | 9,38             | 13,329126        | 5,785           | 0,4641667          | 11,039655     | 23,462845        | 65,4975          | 1,122716061                  |
| 21         | 8   | D        | 15        | 53,138           | 41,224998        | 59,597061         | 0,447491          | 93,845505        | 62,46             | 7,35             | 55,77            |                  |                  | 10,763           | 9,37             |                  | 5,872           | 0,465              | 11,050472     | 20,254808        | 68,694719        | 1,085484589                  |
| 21         | 9   | D        | 1         | 52,098           | 41,670002        | 41,131363         | 0,417492          | 86,329628        | 63,06             | 6,62             | 60,32            |                  |                  | 10,764           | 9,47             | 13,987667        | 4,958           | 0,4183333          | 9,5166801     | 20,661062        | 69,822258        | 1,0019006                    |
| 21         | 9   | D        | 2         | 52,158           | 41,029999        | 56,894764         | 0,457489          | 101,33382        | 57,69             | 0,47             | 53,49            |                  |                  | 11,647           | 9,43             | 13,945667        | 6,266           | 0,4975             | 12,013497     | 22,330227        | 65,656275        | 1,115010995                  |
| 21         | 9   | D        | 3         | 46,187           | 40,2575          | 52,390934         | 0,445             | 63,802773        | 58,19             | 7,77             | 64,38            |                  |                  | 11,354           | 9,43             | 13,105317        | 4,866           | 0,4425             | 10,535432     | 24,582675        | 64,881893        | 1,10538409                   |
| 21         | 9   | D        | 4         | 47,407           | 40,047501        | 53,141575         | 0,419998          | 75,069252        | 60,18             | 9,59             | 56,68            |                  |                  | 11,049           |                  |                  | 5,318           | 0,4566667          | 11,217753     | 23,306685        | 65,475563        | 1,048749584                  |
| 21         | 9   | D        | 5         | 48,158           | 39,9375          | 51,039787         | 0,447498          | 67,568764        | 69,49             | 2,67             | 64,83            |                  |                  | 9,9933           | 9,45             | 13,420668        | 5,337           | 0,4583333          | 11,082271     | 20,751069        | 68,16666         | 1,120495775                  |
| 21         | 9   | D        | 6         | 51,105           | 41,247498        | 60,79808          | 0,459995          | 93,827606        | 64,66             | 1,63             | 60,95            |                  |                  | 12,066           | 9,41             | 13,378668        | 5,542           | 0,4725             | 10,84434      | 23,610214        | 65,545446        | 1,115207036                  |
| 21         | 9   | D        | 7         | 51,71            | 41,564999        | 62,599613         | 0,429981          | 120,12227        | 61,28             | 7,02             | 54,29            |                  |                  | 12,276           | 9,43             | 13,553338        | 5,968           | 0,4825             | 11,541288     | 23,740089        | 64,718623        | 1,034478552                  |
| 21         | 9   | D        | 8         | 49,608           | 40,934998        | 53,141575         | 0,444988          | 101,33382        | 62,77             | 6                | 54,85            |                  |                  | 10,454           | 9,39             | 13,511338        | 5,066           | 0,4266667          | 10,212063     | 21,073214        | 68,714723        | 1,087060026                  |
| 21         | 9   | D        | 9         | 54,663           | 41,934998        | 56,144127         | 0,417496          | 101,33381        | 65,05             | 6,29             | 58,32            |                  |                  | 11,375           | 9,44             | 13,327315        | 5,906           | 0,4541667          | 10,804383     | 20,809323        | 68,386294        | 0,99557892                   |
| 21         | 9   | D        | 10        | 53,941           | 41,579998        | 64,251015         | 0,467495          | 108,84003        | 59,14             | 2,25             | 60,83            |                  |                  | 11,189           | 9,4              | 13,285315        | 6,262           | 0,5166667          | 11,60898      | 20,743034        | 67,647986        | 1,124326653                  |
| 21         | 9   | D        | 11        | 49,17            | 41,037502        | 47,586853         | 0,452488          | 90,074501        | 64,88             | 5,77             | 60,51            |                  |                  | 10,151           | 9,44             | 13,190417        | 4,874           | 0,4308333          | 9,9125483     | 20,644702        | 69,44275         | 1,10262072                   |
| 21         | 9   | D        | 12        | 47,219           | 39,697498        | 49,988892         | 0,432484          | 71,315781        | 60,74             | 2,18             | 64,14            |                  |                  | 9,449            | 9,4              | 13,148417        | 5,116           | 0,4416667          | 10,834622     | 20,011013        | 69,154366        | 1,089449013                  |
| 21         | 9   | D        | 13        | 49,533           | 41,310001        | 55,993996         | 0,45499           | 90,074501        | 59,86             | 7,42             | 52,17            |                  |                  | 10,96            | 9,43             | 13,446769        | 5,373           | 0,4533333          | 10,847314     | 22,126663        | 67,026023        | 1,101403992                  |
| 21         | 9   | D        | 14        | 53,207           | 41,709999        | 48,037235         | 0,449993          | 97,590012        | 63,68             | 5,5              | 57,88            |                  |                  | 12,605           | 9,39             | 13,404769        | 5,19            | 0,4341667          | 9,7543556     | 23,690492        | 66,555153        | 1,07886121                   |
| 21         | 9   | D        | 15        | 50,171           | 40,942501        | 37,678429         | 0,424992          | 97,580704        | 54,84             | 0,94             | 47,74            |                  |                  | 11,43            | 9,32             |                  | 4,949           | 0,4291667          | 9,8642642     | 22,782085        | 67,353651        | 1,03802159                   |

Supplementary Table S1. Raw data of egg quality parameters with ATOL (Animal Trait Ontology for Livestock) descriptors, for hen.

| Hen age | Pen | Genotype | Replicate | ATOL_0001880    | ATOL_0002297       | ATOL_0002119        | ATOL_0002126         | ATOL_0002122          | ATOL_0002074         | ATOL_0002073       | ATOL_0002075      | ATOL_0005600            | ATOL_0005600           | ATOL_0001883     | ATOL_0005587    | ATOL_0001938          | 1881              | ATOL_0002121          | 1881             | ATOL_0001883    | ATOL_0001882       | ATOL_0002125                  |
|---------|-----|----------|-----------|-----------------|--------------------|---------------------|----------------------|-----------------------|----------------------|--------------------|-------------------|-------------------------|------------------------|------------------|-----------------|-----------------------|-------------------|-----------------------|------------------|-----------------|--------------------|-------------------------------|
|         |     |          |           | Egg weight<br>g | Egg diameter<br>mm | Shell strength<br>N | Shell fracture<br>mm | Shell modulus<br>N/mm | Yolk lightness<br>L* | Yolk redness<br>a* | Yolk yellow<br>b* | Blood spot<br>1=present | Meat spot<br>1=present | Yolk weight<br>g | Albumen pH<br>- | Albumen DM<br>% (w/w) | Shell weight<br>g | Shell thickness<br>mm | Shell<br>% (w/w) | Yolk<br>% (w/w) | Albumen<br>% (w/w) | Shell-to-egg-compression<br>% |
| 21      | 11  | C        | 1         | 50,755          | 41,5075            | 42,032131           | 0,469994             | 93,836563             | 47,26                | 4,09               | 42,08             |                         |                        | 11,015           | 9,51            | 14,09306              | 4,667             | 0,4816667             | 9,1951532        | 21,702295       | 69,102551          | 1,132311028                   |
| 21      | 11  | C        | 2         | 48,175          | 39,695             | 51,340042           | 0,442497             | 67,555878             | 45,29                | 5,88               | 53,32             | 1                       |                        | 11,171           | 9,47            | 14,05106              | 5,196             | 0,4441667             | 10,785677        | 23,188376       | 66,025947          | 1,114742411                   |
| 21      | 11  | C        | 3         | 54,909          | 42,807499          | 43,23315            | 0,467487             | 71,322578             | 57,39                | 2,71               | 58,98             |                         |                        | 10,924           | 9,45            | 14,013042             | 5,056             | 0,4041667             | 9,2079623        | 19,894735       | 70,897303          | 1,092068004                   |
| 21      | 11  | C        | 4         | 52,741          | 41,829998          | 43,23315            | 0,429985             | 93,845505             | 62,78                | 4,27               | 55,07             |                         |                        | 11,615           | 9,41            | 13,971042             | 5,138             | 0,4183333             | 9,7419465        | 22,022715       | 68,235339          | 1,027934546                   |
| 21      | 11  | C        | 5         | 60,592          | 43,700001          | 54,492722           | 0,447495             | 67,568756             | 61,76                | 1,76               | 63,32             |                         |                        | 12,17            | 9,47            | 14,582463             | 6,233             | 0,4625                | 10,286837        | 20,08516        | 69,628004          | 1,024015995                   |
| 21      | 11  | C        | 6         | 54,162          | 41,110001          | 55,093231           | 0,482494             | 90,074501             | 54,46                | 7,77               | 51,99             |                         | 1                      | 12,942           | 9,43            | 14,540463             | 5,498             | 0,4525                | 10,151028        | 23,894982       | 65,95399           | 1,173665746                   |
| 21      | 11  | C        | 7         | 48,7            | 40,642498          | 36,177155           | 0,399982             | 75,06208              | 56,10                | 6,91               | 61,72             |                         |                        | 10,714           | 9,39            | 13,955714             | 4,257             | 0,3666667             | 8,7412731        | 22              | 69,258727          | 0,984147185                   |
| 21      | 11  | C        | 8         | 48,771          | 40,610001          | 45,78532            | 0,457493             | 82,568298             | 58,70                | 4,52               | 57,02             |                         |                        | 10,113           | 9,35            | 13,913714             | 4,785             | 0,4041667             | 9,8111583        | 20,735683       | 69,453159          | 1,126552546                   |
| 21      | 11  | C        | 9         | 58,74           | 43,427498          | 51,49017            | 0,447498             | 67,568764             | 53,78                | 4,25               | 59,75             |                         |                        | 10,56            | 9,41            | 13,71494              | 5,817             | 0,4333333             | 9,9029622        | 17,977528       | 72,11951           | 1,030448496                   |
| 21      | 11  | C        | 10        | 51,272          | 41,395             | 42,182259           | 0,409996             | 93,836555             | 56,41                | 2,97               | 49,17             |                         | 1                      | 12,95            | 9,37            | 13,67294              | 4,965             | 0,3925                | 9,683648         | 25,25745        | 65,058902          | 0,990448122                   |
| 21      | 11  | C        | 11        | 56,189          | 43,27              | 43,983788           | 0,484997             | 63,821037             | 61,25                | 1,62               | 63,66             |                         |                        | 13,35            | 9,48            | 14,302003             | 5,097             | 0,3916667             | 9,0711705        | 23,759099       | 67,169731          | 1,120862029                   |
| 21      | 11  | C        | 12        | 51,996          | 41,842499          | 50,439278           | 0,469997             | 93,836563             | 56,76                | 3,37               | 46,38             |                         |                        | 10,81            | 9,44            | 14,260003             | 5,427             | 0,4458333             | 10,437341        | 20,790061       | 68,772598          | 1,123252701                   |
| 21      | 11  | C        | 13        | 49,787          | 40,227501          | 40,981236           | 0,442501             | 63,808853             | 57,55                | 2,10               | 49,99             |                         |                        | 11,251           | 9,44            | 14,201108             | 4,729             | 0,3966667             | 9,4984635        | 22,598269       | 67,903268          | 1,099996244                   |
| 21      | 11  | C        | 14        | 51,349          | 41,087498          | 45,635193           | 0,469986             | 97,599327             | 56,44                | 0,33               | 44,17             | 1                       |                        | 9,926            | 9,4             | 14,159108             | 4,805             | 0,4066667             | 9,3575337        | 19,330464       | 71,312002          | 1,143866195                   |
| 21      | 11  | C        | 15        | 61,31           | 44,255001          | 47,887108           | 0,439991             | 78,830215             | 61,51                | 3,25               | 58,60             |                         |                        | 12,743           | 9,46            |                       | 5,718             | 0,4083333             | 9,3263742        | 20,784538       | 69,889088          | 0,99421758                    |
| 21      | 12  | B        | 1         | 50,894          | 41,120003          | 43,383278           | 0,437489             | 101,34348             | 43,43                | 10,08              | 43,55             | 1                       | 1                      | 9,38             | 9,41            | 14,364077             | 4,678             | 0,4041667             | 9,1916532        | 18,430463       | 72,377883          | 1,063932315                   |
| 21      | 12  | B        | 2         | 53,763          | 42,457504          | 58,095783           | 0,497494             | 86,346107             | 53,95                | 8,68               | 66,33             |                         |                        | 10,786           | 9,45            | 14,406077             | 5,679             | 0,4558333             | 10,563027        | 20,062125       | 69,374849          | 1,171745753                   |
| 21      | 12  | B        | 3         | 51,629          | 41,092503          | 30,622431           | 0,417496             | 78,830215             | 61,47                | 5,63               | 60,62             | 1                       |                        | 11,245           | 9,27            | 13,404769             | 4,228             | 0,3841667             | 8,189196         | 21,780395       | 70,030409          | 1,015990678                   |
| 21      | 12  | B        | 4         | 48,805          | 40,852501          | 39,930344           | 0,417496             | 90,074501             | 61,20                | 8,79               | 62,19             |                         |                        | 11,111           | 9,31            | 13,446769             | 4,568             | 0,43                  | 9,3596968        | 22,76611        | 67,874193          | 1,021959463                   |
| 21      | 12  | B        | 5         | 52,309          | 42,025005          | 46,98634            | 0,439995             | 93,827614             | 59,57                | 3,95               | 57,60             | 1                       | 1                      | 11,611           | 9,4             | 13,877977             | 4,923             | 0,4125                | 9,4113824        | 22,196945       | 68,391673          | 1,046983814                   |
| 21      | 12  | B        | 6         | 51,474          | 41,852501          | 41,882004           | 0,417496             | 105,08692             | 61,70                | 12,71              | 63,32             |                         |                        | 10,487           | 9,44            | 13,919977             | 4,927             | 0,4208333             | 9,5718227        | 20,373392       | 70,054785          | 0,997541342                   |
| 21      | 12  | B        | 7         | 50,606          | 40,564999          | 45,034683           | 0,437489             | 78,822708             | 52,00                | 11,43              | 61,69             |                         |                        | 11,356           | 9,38            | 13,170786             | 4,935             | 0,4391667             | 9,7518081        | 22,440027       | 67,808165          | 1,078488872                   |
| 21      | 12  | B        | 8         | 54,151          | 41,3125            | 46,38583            | 0,429993             | 93,845505             | 53,50                | 10,33              | 51,89             |                         |                        | 10,038           | 9,42            | 13,212786             | 5,172             | 0,415                 | 9,5510702        | 18,537054       | 71,911876          | 1,040830257                   |
| 21      | 12  | B        | 9         | 57,548          | 42,57              | 25,818348           | 0,462494             | 52,525967             | 58,87                | 1,77               | 52,01             |                         |                        | 11,941           | 9,4             | 14,492336             | 3,972             | 0,3425                | 6,9020644        | 20,749635       | 72,348301          | 1,086431759                   |
| 21      | 12  | B        | 10        | 51,258          | 42,227501          | 53,892212           | 0,489994             | 82,584045             | 60,89                | 8,48               | 58,90             |                         |                        | 11,854           | 9,44            | 14,534336             | 4,818             | 0,4133333             | 9,3995084        | 23,126146       | 67,474345          | 1,160367032                   |
| 21      | 12  | B        | 11        | 52,762          | 40,372498          | 34,225494           | 0,464985             | 63,80278              | 51,54                | 8,85               | 59,70             |                         |                        | 11,695           | 9,38            | 13,511032             | 4,373             | 0,3891667             | 8,2881619        | 22,165574       | 69,546264          | 1,151737007                   |
| 21      | 12  | B        | 12        | 54,483          | 42,545002          | 46,686085           | 0,462486             | 75,069244             | 63,99                | 1,09               | 58,20             | 1                       |                        | 11,076           | 9,42            | 13,553032             | 5,055             | 0,4166667             | 9,2781235        | 20,329277       | 70,3926            | 1,087051306                   |
| 21      | 12  | B        | 13        | 50,988          | 41,829998          | 35,576641           | 0,429989             | 90,091698             | 48,98                | 8,59               | 60,79             |                         | 1                      | 10,506           | 9,41            | 13,278492             | 4,145             | 0,3616667             | 8,1293638        | 20,604848       | 71,265788          | 1,027944108                   |
| 21      | 12  | B        | 14        | 51,093          | 41,387501          | 50,139019           | 0,414997             | 97,590012             | 58,47                | 10,83              | 59,83             |                         |                        | 10,126           | 9,45            | 13,320492             | 5,395             | 0,4516667             | 10,559176        | 19,818762       | 69,622062          | 1,002710939                   |
| 21      | 12  | B        | 15        | 48,331          | 38,592499          | 34,675877           | 0,407486             | 71,308975             | 60,96                | 6,95               | 59,13             |                         |                        | 9,495            | 9,21            |                       | 4,591             | 0,4333333             | 9,4990793        | 19,645776       | 70,855145          | 1,055868396                   |
| 25      | 1   | C        | 1         | 63,835          | 44,852501          | 51,039787           | 0,387505             | 86,321381             | 58,17                | 2,7                | 56,6              |                         |                        | 11,667           | 9,29            | 14,583542             | 6,651             | 0,4625                | 10,419049        | 18,276807       | 71,304143          | 0,863954052                   |
| 25      | 1   | C        | 2         | 58,041          | 43,047501          | 47,586853           | 0,417507             | 105,08691             | 60,69                | -5,2               | 46,53             |                         |                        | 13,677           | 9,33            | 14,625542             | 5,868             | 0,4466667             | 10,110095        | 23,564377       | 66,325529          | 0,969875115                   |
| 25      | 1   | C        | 3         | 56,575          | 43,175003          | 49,388382           | 0,432495             | 108,86079             | 61,55                | 2,14               | 53,88             |                         |                        | 13,282           | 9,28            | 14,667129             | 5,54              | 0,4225                | 9,7923111        | 23,476801       | 66,730888          | 1,001725466                   |
| 25      | 1   | C        | 4         | 56,474          | 43,997498          | 43,23315            | 0,437489             | 78,822708             | 54,84                | 4,24               | 53,45             |                         |                        | 13,194           | 9,32            | 14,709129             | 5,119             | 0,405                 | 9,0643482        | 23,362963       | 67,572688          | 0,994349724                   |
| 25      | 1   | C        | 5         | 58,104          | 43,264999          | 43,23315            | 0,409988             | 93,818657             | 61,42                | 0,4                | 55,45             |                         | 1                      | 14,22            | 9,38            | 13,594783             | 5,788             | 0,4141667             | 9,9614484        | 24,473358       | 65,565193          | 0,9476205                     |
| 25      | 1   | C        | 6         | 62,11           | 44,614998          | 52,090679           | 0,420002             | 82,576157             | 61,8                 | 0,29               | 52,03             |                         |                        | 13,757           | 9,42            | 13,636783             | 6,178             | 0,3941667             | 9,9468685        | 22,149412       | 67,903719          | 0,941391951                   |
| 25      | 1   | C        | 7         | 60,046          | 43,919998          | 48,938              | 0,437492             | 63,808853             | 61,73                | 2,95               | 53,4              |                         |                        | 13,668           | 9,22            | 13,971614             | 5,93              | 0,435                 | 9,8757619        | 22,762549       | 67,361689          | 0,996111156                   |
| 25      | 1   | C        | 8         | 57,163          | 43,230003          | 45,034683           | 0,394985             | 93,827606             | 63,7                 | -3,5               | 49,93             | 1                       |                        | 13,801           | 9,26            | 14,013614             | 5,955             | 0,4583333             | 10,417578        | 24,14324        | 65,439183          | 0,913682564                   |
| 25      | 1   | C        | 9         | 57,781          | 43,379997          | 45,485065           | 0,467503             | 71,308983             | 61,55                | 0,51               | 55,07             |                         |                        | 13,95            | 9,42            | 13,786667             | 5,341             | 0,3991667             | 9,243523         | 24,142884       | 66,613593          | 1,07769256                    |
| 25      | 1   | C        | 10        | 58,858          | 43,800003          | 42,482513           | 0,419998             | 67,562325             | 67,45                | -3,02              | 54,04             |                         |                        | 14,17            | 9,46            | 13,828667             | 5,508             | 0,4241667             | 9,3581161        | 24,074892       | 66,566992          | 0,958899478                   |
| 25      | 1   | C        | 11        | 52,17           | 41,887505          | 43,83366            | 0,455002             | 101,32414             |                      |                    |                   |                         |                        |                  | 9,41            | 13,779821             | 4,82              | 0,3991667             | 9,2390263        | 0               | 90,760974          | 1,086247558                   |
| 25      | 1   | C        | 12        | 55,991          | 42,695             | 63,049995           | 0,452503             | 116,35734             | 66,14                | -4,43              | 48,23             |                         |                        | 12,545           | 9,45            | 13,821821             | 6,31              | 0,4783333             | 11,269668        | 22,405387       | 66,324945          | 1,0598501                     |
| 25      | 1   | C        | 13        | 57,865          | 43,345001          | 51,640297           | 0,462498             | 90,077469             | 61,68                | -0,77              | 50,2              |                         |                        | 13,921           | 9,39            | 13,776314             | 5,764             | 0,425                 | 9,9611164        | 24,057721       | 65,981163          | 1,067015779                   |
| 25      | 1   | C        | 14        | 59,369          | 43,805             | 44,434174           | 0,432503             | 67,58165              | 64,52                | -3,7               | 48,31             | 1                       |                        | 13,857           | 9,43            | 13,818314             | 5,804             | 0,4325                | 9,7761458        | 23,340464       | 66,88339           | 0,987337062                   |
| 25      | 1   | C        | 15        | 53,591          | 42,172501          | 41,731876           | 0,427494             | 90,100281             | 57,24                | 1,19               | 52,15             |                         |                        | 13,913           | 9,33            |                       | 5,072             | 0,4058333             | 9,4642757        | 25,961449       | 64,574276          | 1,013679506                   |

Supplementary Table S1. Raw data of egg quality parameters with ATOL (Animal Trait Ontology for Livestock) descriptors, for hen.

|            |     |          |           | ATOL_<br>0001880 | ATOL_<br>0002297 | ATOL_<br>0002119  | ATOL_<br>0002126  | ATOL_<br>0002122 | ATOL_<br>0002074  | ATOL_<br>0002073 | ATOL_<br>0002075 | ATOL_<br>0005600 | ATOL_<br>0005600 | ATOL_<br>0001883 | ATOL_<br>0005587 | ATOL_<br>0001938 | ATOL_<br>1881   | ATOL_<br>0002121   | ATOL_<br>1881 | ATOL_<br>0001883 | ATOL_<br>0001882 | ATOL_<br>0002125             |
|------------|-----|----------|-----------|------------------|------------------|-------------------|-------------------|------------------|-------------------|------------------|------------------|------------------|------------------|------------------|------------------|------------------|-----------------|--------------------|---------------|------------------|------------------|------------------------------|
| Hen<br>age | Pen | Genotype | Replicate | Egg<br>weight    | Egg<br>diameter  | Shell<br>strength | Shell<br>fracture | Shell<br>modulus | Yolk<br>lightness | Yolk<br>redness  | Yolk<br>yellow   | Blood<br>spot    | Meat spot        | Yolk<br>weight   | Albumen<br>pH    | Albumen<br>DM    | Shell<br>weight | Shell<br>thickness | Shell         | Yolk             | Albumen          | Shell-to-egg-<br>compression |
| wk         | no. |          |           | g                | mm               | N                 | mm                | N/mm             | L*                | a*               | b*               | 1=present        | 1=present        | g                | -                | % (w/w)          | g               | mm                 | % (w/w)       | % (w/w)          | % (w/w)          | %                            |
| 25         | 2   | D        | 1         | 59,23            | 44,285004        | 38,128811         | 0,412495          | 63,821037        | 66,34             | -1,4             | 54,77            |                  |                  | 13,363           | 9,23             | 13,797027        | 4,938           | 0,3891667          | 8,3369914     | 22,561202        | 69,101807        | 0,931455262                  |
| 25         | 2   | D        | 2         | 61,796           | 43,850006        | 56,594509         | 0,43499           | 75,069237        | 65,17             | -0,88            | 56,55            |                  |                  | 14,737           | 9,27             | 13,839027        | 6,565           | 0,4741667          | 10,623665     | 23,847822        | 65,528513        | 0,991995303                  |
| 25         | 2   | D        | 3         | 60,677           | 44,389999        | 46,98634          | 0,439987          | 60,04966         | 67,14             | -1,22            | 54,09            |                  |                  | 10,836           | 9,15             | 13,572429        | 5,347           | 0,3983333          | 8,8122353     | 17,858497        | 73,329268        | 0,991184974                  |
| 25         | 2   | D        | 4         | 61,521           | 43,6325          | 43,083023         | 0,462502          | 67,568771        | 68,97             | -2,62            | 51,14            |                  |                  | 13,65            | 9,19             | 13,614429        | 4,997           | 0,3725             | 8,1224297     | 22,187546        | 69,690025        | 1,05999427                   |
| 25         | 2   | D        | 5         | 60,05            | 43,904999        | 59,446934         | 0,467487          | 78,822701        | 68,32             | -4,8             | 47,75            |                  |                  | 12,929           | 9,34             | 13,213345        | 6,282           | 0,4516667          | 10,461282     | 21,530391        | 68,008326        | 1,064769413                  |
| 25         | 2   | D        | 6         | 58,298           | 44,215004        | 50,439278         | 0,429989          | 60,049671        | 69,54             | -0,77            | 53,34            |                  |                  | 12,288           | 9,38             | 13,255345        | 6,135           | 0,4666667          | 10,523517     | 21,07791         | 68,398573        | 0,972495671                  |
| 25         | 2   | D        | 7         | 53,211           | 41,919998        | 55,243359         | 0,432499          | 116,34622        | 63,16             | 3,16             | 54,74            |                  |                  | 12,586           | 9,29             | 13,25853         | 5,45            | 0,435              | 10,242243     | 23,653004        | 66,104753        | 1,031724763                  |
| 25         | 2   | D        | 8         | 59,259           | 43,739998        | 57,795528         | 0,455002          | 71,315781        | 64,5              | -1,49            | 52,88            |                  |                  | 12,225           | 9,33             | 13,30053         | 5,993           | 0,4533333          | 10,113232     | 20,629778        | 69,25699         | 1,040242389                  |
| 25         | 2   | D        | 9         | 55,776           | 43,057503        | 60,647953         | 0,467503          | 82,568283        | 63,34             | -3,91            | 43,38            |                  |                  | 14,458           | 9,33             | 13,273798        | 6,08            | 0,4566667          | 10,900746     | 25,921543        | 63,177711        | 1,085764309                  |
| 25         | 2   | D        | 10        | 57,113           | 42,934998        | 47,887108         | 0,425007          | 86,337875        | 58,99             | 1,54             | 59,86            |                  |                  | 12,268           | 9,37             | 13,315798        | 5,635           | 0,4341667          | 9,8664052     | 21,480223        | 68,653371        | 0,989884756                  |
| 25         | 2   | D        | 11        | 57,624           | 43,202499        | 55,843868         | 0,4725            | 86,3461          | 64,38             | -2,02            | 46,43            |                  |                  | 11,597           | 9,35             | 13,403756        | 6,239           | 0,455              | 10,827086     | 20,125295        | 69,047619        | 1,093686733                  |
| 25         | 2   | D        | 12        | 56,941           | 43,195           | 52,240807         | 0,440002          | 97,571396        | 61,05             | -2,78            | 49,55            |                  |                  | 13,173           | 9,39             | 13,445756        | 5,739           | 0,4425             | 10,078854     | 23,134473        | 66,786674        | 1,018641046                  |
| 25         | 2   | D        | 13        | 55,04            | 42,120003        | 52,991444         | 0,415005          | 116,35734        | 65,86             | -3,99            | 46,21            |                  |                  | 12,046           | 9,33             | 13,828057        | 5,713           | 0,3766667          | 10,379724     | 21,885901        | 67,734375        | 0,985291953                  |
| 25         | 2   | D        | 14        | 56,692           | 43,292503        | 60,347698         | 0,46249           | 101,34348        | 65,86             | -3,99            | 46,21            |                  |                  | 14,035           | 9,37             | 13,870057        | 5,826           | 0,4316667          | 10,276582     | 24,756579        | 64,966838        | 1,0682912                    |
| 25         | 2   | D        | 15        | 50,365           | 41,184998        |                   | 0,254982          | 71,329391        | 60,36             | 0,21             | 64,25            |                  |                  | 11,466           | 9,37             |                  | 4,192           | 0,3608333          | 8,3232403     | 22,76581         | 68,91095         | 0,619113785                  |
| 25         | 3   | B        | 1         | 62,374           | 43,887497        | 28,520645         | 0,362507          | 60,038322        | 66,17             | -2,69            | 55,43            |                  |                  | 14,817           | 9,15             | 13,264575        | 5,049           | 0,3725             | 8,094719      | 23,75509         | 68,150191        | 0,825991512                  |
| 25         | 3   | B        | 2         | 62,004           | 44,0625          | 38,729324         | 0,425007          | 56,307308        | 63,14             | 3,4              | 57,32            |                  |                  | 14,427           | 9,19             | 13,306575        | 5,47            | 0,4108333          | 8,8220115     | 23,267854        | 67,910135        | 0,964554894                  |
| 25         | 3   | B        | 3         | 55,232           | 42,787506        | 42,632641         | 0,412491          | 78,830215        | 67,76             | -0,88            | 60,79            |                  |                  | 12,929           | 9,36             | 13,868973        | 5,458           | 0,425              | 9,8819525     | 23,408531        | 66,709516        | 0,964045439                  |
| 25         | 3   | B        | 4         | 55,533           | 42,282501        | 34,525749         | 0,359993          | 101,33381        | 65,48             | 0,54             | 58,16            |                  |                  | 13,062           | 9,4              | 13,910973        | 5,46            | 0,4275             | 9,8319918     | 23,52115         | 66,646859        | 0,851399495                  |
| 25         | 3   | B        | 5         | 61,608           | 44,590004        | 43,683533         | 0,395             | 78,822701        | 58,62             | -0,35            | 62,42            |                  |                  | 14,414           | 9,31             | 12,757978        | 5,922           | 0,4283333          | 9,612388      | 23,396312        | 66,9913          | 0,885848766                  |
| 25         | 3   | B        | 6         | 57,75            | 43,180008        | 35,726768         | 0,429993          | 67,542999        | 60,09             | 4,81             | 57,56            |                  |                  | 13,384           | 9,35             | 12,799978        | 4,98            | 0,39               | 8,6233766     | 23,175758        | 68,200866        | 0,995815008                  |
| 25         | 3   | B        | 7         | 60,837           | 44               | 39,029579         | 0,384998          | 86,3461          | 58,41             | 4,18             | 61,36            | 1                |                  | 13,18            | 9,36             | 12,983146        | 5,246           | 0,4033333          | 8,6230419     | 21,664448        | 69,71251         | 0,874995455                  |
| 25         | 3   | B        | 8         | 57,559           | 43,052498        | 32,724216         | 0,394997          | 82,584038        | 60,64             | 4,08             | 53,83            |                  |                  | 12,877           | 9,4              | 13,025146        | 4,869           | 0,3866667          | 8,4591463     | 22,371827        | 69,169027        | 0,917477541                  |
| 25         | 3   | B        | 9         | 62,681           | 44,217499        | 46,686085         | 0,467487          | 60,049671        | 61,8              | -0,83            | 55,85            |                  |                  | 14,578           | 9,31             | 13,646891        | 5,667           | 0,4158333          | 9,0410172     | 23,257446        | 67,701536        | 1,057244328                  |
| 25         | 3   | B        | 10        | 59,036           | 44,097504        | 47,286594         | 0,452503          | 71,322578        | 64,3              | 0,69             | 56,46            |                  |                  | 14,233           | 9,35             | 13,688891        | 5,664           | 0,4083333          | 9,5941459     | 24,109018        | 66,296836        | 1,026141978                  |
| 25         | 3   | B        | 11        | 61,486           | 44,792503        | 48,33749          | 0,33749           | 93,827606        | 63,9              | -1,96            | 52,56            |                  |                  | 14,372           | 9,2              | 11,356246        | 6,055           | 0,4358333          | 9,8477702     | 23,374427        | 66,777803        | 0,753451978                  |
| 25         | 3   | B        | 12        | 57,021           | 43,607498        | 43,533405         | 0,449997          | 72,064194        | 55,32             | -1,56            | 47,49            |                  |                  | 13,919           | 9,24             | 11,398246        | 4,967           | 0,375              | 8,7108258     | 24,410305        | 66,878869        | 1,031925748                  |
| 25         | 3   | B        | 13        | 61,545           | 44,1325          | 43,983788         | 0,429996          | 60,049671        | 65,02             | 1,95             | 61,68            |                  |                  | 15,178           | 9,35             | 13,289836        | 5,746           | 0,4008333          | 9,336258      | 24,66163         | 66,002112        | 0,974329576                  |
| 25         | 3   | B        | 14        | 58,061           | 43,305           |                   |                   |                  | 62,68             | 1,22             | 52,36            |                  |                  | 13,965           | 9,39             | 13,331836        | 5,618           | 0,4216667          | 9,6760304     | 24,05229         | 66,27168         |                              |
| 25         | 3   | B        | 15        | 60,935           | 44,794998        | 55,543613         | 0,467491          | 78,830231        | 64,37             | -2,73            | 50,86            |                  | 1                | 14,037           | 9,4              |                  | 5,816           | 0,4266667          | 9,5445967     | 23,036022        | 67,419381        | 1,043623219                  |
| 25         | 4   | A        | 1         | 54,988           | 41,599998        | 40,831108         | 0,397499          | 112,59315        | 53,89             | 4,78             | 61,51            |                  |                  | 13,217           | 9,38             | 13,952352        | 5,534           | 0,4266667          | 10,064014     | 24,036153        | 65,899833        | 0,955526488                  |
| 25         | 4   | A        | 2         | 56,595           | 42,290001        | 49,838764         | 0,462494          | 105,08692        | 60,53             | 0,79             | 54,3             | 1                |                  | 14,3             | 9,42             | 13,994352        | 5,819           | 0,4508333          | 10,281827     | 25,26725         | 64,450923        | 1,093624945                  |
| 25         | 4   | A        | 3         | 55,456           | 42,269997        |                   |                   |                  | 66,01             | 0,48             | 62,07            |                  |                  | 13,936           | 9,4              | 14,009718        | 5,356           | 0,4216667          | 9,6581073     | 25,129833        | 65,21206         |                              |
| 25         | 4   | A        | 4         | 54,439           | 42,065002        | 44,734428         | 0,427498          | 97,590027        | 65,02             | -1,71            | 53,71            |                  |                  | 12,247           | 9,44             | 14,051718        | 5,428           | 0,42               | 9,970793      | 22,496739        | 67,532468        | 1,016279519                  |
| 25         | 4   | A        | 5         | 54,745           | 41,962502        | 46,535957         | 0,417496          | 105,07689        | 60,36             | 0,52             | 59,77            |                  |                  | 13,972           | 9,38             | 13,575674        | 5,6             | 0,4475             | 10,229245     | 25,521965        | 64,24879         | 0,994926375                  |
| 25         | 4   | A        | 6         | 58,498           | 43,175003        | 50,28915          | 0,470005          | 82,552551        | 62,53             | 0,79             | 54,38            |                  |                  | 13,579           | 9,29             | 13,645798        | 5,662           | 0,4325             | 9,6789634     | 23,212759        | 67,108277        | 1,088604441                  |
| 25         | 4   | A        | 7         | 55,857           | 42,800003        | 48,787872         | 0,472504          | 93,836563        | 64,84             | 1,09             | 59,55            |                  |                  | 13,601           | 9,33             | 13,687798        | 5,323           | 0,4158333          | 9,5296919     | 24,349679        | 66,120629        | 1,103981231                  |
| 25         | 4   | A        | 8         | 56,85            | 43,527496        | 45,635193         | 0,464996          | 71,315781        | 54,11             | -0,17            | 61,74            |                  | 1                | 15,474           | 9,41             | 13,868943        | 5,524           | 0,4283333          | 9,7167986     | 27,218997        | 63,064204        | 1,06828107                   |
| 25         | 4   | A        | 9         | 62,828           | 43,597504        | 49,538509         | 0,377499          | 86,321381        | 62,6              | 4,62             | 54,7             |                  |                  | 13,734           | 9,28             | 14,504897        | 6,898           | 0,4866667          | 10,979181     | 21,85968         | 67,161138        | 0,865872964                  |
| 25         | 4   | A        | 10        | 61,743           | 43,547501        | 48,037235         | 0,429993          | 82,568306        | 55,42             | 7,55             | 66,17            |                  |                  | 12,887           | 9,38             | 14,439059        | 6,245           | 0,4491667          | 10,114507     | 20,872002        | 69,013491        | 0,987411425                  |
| 25         | 4   | A        | 11        | 68,524           | 46,290001        | 58,84642          | 0,4725            | 120,09934        | 63,29             | 5,3              | 60,8             |                  |                  | 14,223           | 9,43             | 14,61642         | 7,042           | 0,4658333          | 10,276691     | 20,756231        | 68,967077        | 1,020738798                  |
| 25         | 4   | A        | 12        | 54,903           | 42,192505        | 47,887108         | 0,467495          | 97,590027        | 59,03             | -1,46            | 57,9             |                  |                  | 12,377           | 9,46             | 14,817992        | 5,496           | 0,4316667          | 10,010382     | 22,543395        | 67,446223        | 1,108004846                  |
| 25         | 4   | A        | 13        | 57,845           | 43,082497        | 53,44183          | 0,449997          | 97,565781        | 66,66             | 0,66             | 60,45            |                  |                  | 13,957           | 9,37             |                  | 6,12            | 0,4533333          | 10,579998     | 24,128274        | 65,291728        | 1,04450074                   |
| 25         | 4   | A        | 14        | 56,192           | 42,862503        | 53,44183          | 0,479996          | 93,836563        | 65,93             | -4,2             | 50,29            |                  |                  | 14,277           | 9,41             |                  | 5,991           | 0,475              | 10,66166      | 25,407531        | 63,930809        | 1,119850607                  |
| 25         | 4   | A        | 15        | 56,288           | 42,785004        | 51,790424         | 0,449993          | 90,100281        | 67,25             | -3,77            | 52,57            |                  |                  | 14,642           | 9,52             |                  | 5,959           | 0,4758333          | 10,586626     | 26,012649        | 63,400725        | 1,051754021                  |

Supplementary Table S1. Raw data of egg quality parameters with ATOL (Animal Trait Ontology for Livestock) descriptors, for hen.

| Hen age | Pen | Genotype | Replicate | ATOL_0001880 | ATOL_0002297 | ATOL_0002119   | ATOL_0002126   | ATOL_0002122  | ATOL_0002074   | ATOL_0002073 | ATOL_0002075 | ATOL_0005600 | ATOL_0005600 | ATOL_0001883 | ATOL_0005587 | ATOL_0001938 | ATOL_1881    | ATOL_0002121    | ATOL_1881 | ATOL_0001883 | ATOL_0001882 | ATOL_0002125             |
|---------|-----|----------|-----------|--------------|--------------|----------------|----------------|---------------|----------------|--------------|--------------|--------------|--------------|--------------|--------------|--------------|--------------|-----------------|-----------|--------------|--------------|--------------------------|
|         |     |          |           | Egg weight   | Egg diameter | Shell strength | Shell fracture | Shell modulus | Yolk lightness | Yolk redness | Yolk yellow  | Blood spot   | Meat spot    | Yolk weight  | Albumen pH   | Albumen DM   | Shell weight | Shell thickness | Shell     | Yolk         | Albumen      | Shell-to-egg-compression |
| wk      | no. |          |           | g            | mm           | N              | mm             | N/mm          | L*             | a*           | b*           | 1=present    | 1=present    | g            | -            | % (w/w)      | g            | mm              | % (w/w)   | % (w/w)      | % (w/w)      | %                        |
| 25      | 5   | B        | 1         | 56,733       | 42,355003    | 31,072815      | 0,377495       | 90,083107     | 61,7           | 4,22         | 61,14        | 1            |              | 13,183       | 9,25         | 13,538892    | 4,826        | 0,3775          | 8,506513  | 23,236917    | 68,25657     | 0,89126425               |
| 25      | 5   | B        | 2         | 55,386       | 42,084999    | 30,021921      | 0,337502       | 93,827606     | 63,64          | 1,13         | 60,23        |              |              | 12,591       | 9,29         | 13,580892    | 4,829        | 0,3816667       | 8,7188098 | 22,733182    | 68,548009    | 0,801953209              |
| 25      | 5   | B        | 3         | 59,908       | 42,779999    | 37,528301      | 0,397491       | 86,346107     | 60,85          | 1,98         | 56,32        |              |              | 13,661       | 9,32         | 13,370608    | 5,496        | 0,3975          | 9,1740669 | 22,803298    | 68,022635    | 0,929151494              |
| 25      | 5   | B        | 4         | 55,999       | 42,527496    | 44,884556      | 0,487499       | 86,329628     | 59,17          | 1,1          | 58,3         |              | 1            | 12,315       | 9,36         | 13,412608    | 5,117        | 0,3991667       | 9,1376632 | 21,991464    | 68,870873    | 1,146314845              |
| 25      | 5   | B        | 5         | 60,352       | 43,407501    | 45,034683      | 0,447506       | 82,560417     | 55,15          | 1,65         | 53,37        |              |              | 13,456       | 9,32         | 13,349474    | 5,687        | 0,4141667       | 9,4230514 | 22,295864    | 68,281084    | 1,030941634              |
| 25      | 5   | B        | 6         | 58,217       | 43,652496    | 40,530853      | 0,462494       | 71,315788     | 57,74          | 3,22         | 68,93        |              |              | 14,166       | 9,36         | 13,391474    | 5,039        | 0,3833333       | 8,6555473 | 24,333099    | 67,011354    | 1,05949039               |
| 25      | 5   | B        | 7         | 61,323       | 44,112503    | 47,136467      | 0,464996       | 71,322586     | 64,51          | 0,3          | 55,04        |              | 1            | 15,629       | 9,36         | 13,079137    | 5,773        | 0,4175          | 9,4140861 | 25,486359    | 65,099555    | 1,054113842              |
| 25      | 5   | B        | 8         | 62,93        | 44,347504    | 43,683533      | 0,402512       | 78,830231     | 67,82          | -2,04        | 59,98        |              |              | 13,781       | 9,4          | 13,121137    | 6,115        | 0,4333333       | 9,717146  | 21,898935    | 68,383919    | 0,90763169               |
| 25      | 5   | B        | 9         | 57,573       | 42,840004    | 46,98634       | 0,409996       | 93,836555     | 59,86          | 0,33         | 52,87        |              |              | 13,822       | 9,38         | 12,908624    | 5,766        | 0,4366667       | 10,015111 | 24,007781    | 65,977107    | 0,95704006               |
| 25      | 5   | B        | 10        | 59,779       | 43,577499    | 32,874344      | 0,372494       | 67,562325     | 60             | 3,95         | 55,83        |              | 1            | 15,633       | 9,42         | 12,950624    | 5,652        | 0,4166667       | 9,4548253 | 26,151324    | 64,393851    | 0,854785173              |
| 25      | 5   | B        | 11        | 56,136       | 43,717499    | 34,375622      | 0,382484       | 67,568756     | 64             | -1,52        | 56,6         |              |              | 14,118       | 9,37         | 13,512541    | 4,844        | 0,3666667       | 8,6290438 | 25,149637    | 66,22132     | 0,874899088              |
| 25      | 5   | B        | 12        | 55,253       | 43,440002    | 25,818348      | 0,339996       | 67,568756     | 57,79          | 5,11         | 58,24        |              |              | 11,801       | 9,41         | 13,554541    | 4,561        | 0,3616667       | 8,2547554 | 21,358116    | 70,387128    | 0,782679522              |
| 25      | 5   | B        | 13        | 56,819       | 43,315002    | 40,230598      | 0,447502       | 71,315781     | 61,23          | 5,54         | 51,68        |              |              | 12,716       | 9,35         | 13,04868     | 4,736        | 0,3733333       | 8,33524   | 22,379838    | 69,284922    | 1,033133971              |
| 25      | 5   | B        | 14        | 57,127       | 42,580002    | 41,882004      | 0,43499        | 86,329636     | 64,41          | -1,66        | 54,16        |              |              | 13,871       | 9,39         | 13,09068     | 5,252        | 0,4183333       | 9,1935512 | 24,280988    | 66,525461    | 1,021582855              |
| 25      | 5   | B        | 15        | 59,125       | 43,222504    | 40,831108      | 0,447502       | 82,568291     | 61,55          | 1,44         | 61,08        |              |              | 13,406       | 9,33         |              | 5,47         | 0,4141667       | 9,2515856 | 22,673996    | 68,074419    | 1,035344921              |
| 25      | 6   | C        | 1         | 59,536       | 44,155006    | 42,482513      | 0,392494       | 56,307301     | 63,49          | -1,3         | 50,33        |              | 1            | 13,83        | 9,35         | 13,216925    | 6,12         | 0,4483333       | 10,279495 | 23,229643    | 66,490863    | 0,888900343              |
| 25      | 6   | C        | 2         | 52,747       | 40,949997    | 35,726768      | 0,382492       | 90,065918     | 60,51          | 3,72         | 56,03        |              |              | 12,948       | 9,39         | 13,258925    | 5,03         | 0,3916667       | 9,5360874 | 24,547368    | 65,916545    | 0,934046466              |
| 25      | 6   | C        | 3         | 62,494       | 43,872498    | 51,49017       | 0,452503       | 60,055389     | 64,16          | -3,37        | 50,41        |              |              | 14,727       | 9,36         | 13,451746    | 6,2          | 0,4441667       | 9,9209524 | 23,565462    | 66,513585    | 1,031404685              |
| 25      | 6   | C        | 4         | 60,759       | 43,794998    | 52,240807      | 0,464993       | 63,814945     | 62,75          | 3,99         | 58,06        |              |              | 14,152       | 9,4          | 13,493746    | 6,121        | 0,4558333       | 10,074228 | 23,292023    | 66,63375     | 1,061749107              |
| 25      | 6   | C        | 5         | 60,307       | 42,790001    | 55,543613      | 0,465          | 97,599319     | 68,1           | -0,65        | 53,97        |              |              | 13,913       | 9,41         | 13,198814    | 6,395        | 0,4525          | 10,604076 | 23,07029     | 66,325634    | 1,086702475              |
| 25      | 6   | C        | 6         | 52,971       | 42,227501    | 57,345146      | 0,480003       | 112,58239     | 59,95          | 3,79         | 53,88        |              |              | 13,736       | 9,45         | 13,240814    | 5,545        | 0,43            | 10,467992 | 25,93117     | 63,600838    | 1,136707095              |
| 25      | 6   | C        | 7         | 60,295       | 44,199997    | 47,73698       | 0,434998       | 67,568756     | 64,29          | -2,63        | 48,09        |              |              | 14,134       | 9,37         | 14,027712    | 6,082        | 0,4458333       | 10,087072 | 23,441413    | 66,471515    | 0,984158438              |
| 25      | 6   | C        | 8         | 54,959       | 42,695       | 48,787872      | 0,444984       | 90,09169      | 59,21          | -1,72        | 55,56        |              |              | 12,25        | 9,41         | 14,069712    | 5,447        | 0,4283333       | 9,9110246 | 22,289343    | 67,799632    | 1,042239138              |
| 25      | 6   | C        | 9         | 55,434       | 42,317497    | 43,083023      | 0,459999       | 82,584053     | 63,44          | 0,31         | 52,12        |              |              | 12,013       | 9,37         | 13,898822    | 5,042        | 0,4108333       | 9,095501  | 21,670816    | 69,233683    | 1,08701845               |
| 25      | 6   | C        | 10        | 60,692       | 44,165001    | 23,266178      | 0,272491       | 60,043949     | 63,24          | -1,45        | 49,46        |              |              | 13,198       | 9,41         | 13,940822    | 5,87         | 0,4225          | 9,6717854 | 21,745864    | 68,58235     | 0,616984023              |
| 25      | 6   | C        | 11        | 54,422       | 41,82        | 44,284042      | 0,424999       | 93,836555     | 60,93          | 1,86         | 54,24        |              |              | 13,367       | 9,36         | 13,088541    | 5,428        | 0,4208333       | 9,9739076 | 24,561758    | 65,464334    | 1,016257771              |
| 25      | 6   | C        | 12        | 55,707       | 42,279999    | 39,930344      | 0,409996       | 93,845505     | 60,02          | 2,27         | 48,66        |              |              | 13,698       | 9,4          | 13,130541    | 5,267        | 0,3908333       | 9,4548261 | 24,589369    | 65,955804    | 0,969716201              |
| 25      | 6   | C        | 13        | 56,144       | 43,1325      | 57,345146      | 0,482491       | 90,09169      | 54,86          | 5,62         | 48,47        |              |              | 13,613       | 9,38         | 12,845192    | 6,03         | 0,4441667       | 10,740239 | 24,24658     | 65,01318     | 1,118625167              |
| 25      | 6   | C        | 14        | 58,97        | 44,3675      | 46,085575      | 0,434994       | 75,076408     | 61,05          | 0,01         | 47,58        |              |              | 13,055       | 9,42         | 12,887192    | 5,63         | 0,4266667       | 9,5472274 | 22,138375    | 68,314397    | 0,980433876              |
| 25      | 6   | C        | 15        | 54,278       | 42,447502    | 35,126259      | 0,394989       | 93,836563     | 60,73          | 2,66         | 53,8         |              |              | 13,546       | 9,37         |              | 4,949        | 0,3775          | 9,1178746 | 24,956704    | 65,925421    | 0,930535323              |
| 25      | 7   | A        | 1         | 52,848       | 39,877502    | 42,332386      | 0,360001       | 82,568306     | 60,06          | 2,61         | 56,15        |              |              | 12,879       | 9,27         | 13,781595    | 5,448        | 0,4616667       | 10,30881  | 24,369891    | 65,321299    | 0,902767179              |
| 25      | 7   | A        | 2         | 51,65        | 41,93        | 48,787872      | 0,432487       | 101,3435      | 58,68          | 3,08         | 53,31        |              |              | 13,092       | 9,31         | 13,823595    | 5,174        | 0,4391667       | 10,017425 | 25,347531    | 64,635044    | 1,031450036              |
| 25      | 7   | A        | 3         | 53,27        | 41,184998    | 46,686085      | 0,422497       | 97,599327     | 57,93          | 7,33         | 61,06        |              |              | 14,959       | 9,41         | 13,499055    | 5,319        | 0,4275          | 9,9849822 | 28,081472    | 61,933546    | 1,025851695              |
| 25      | 7   | A        | 4         | 51,868       | 42,18        | 51,640297      | 0,424992       | 120,11079     | 64,29          | 2,01         | 59,2         | 1            |              | 13,781       | 9,45         | 13,541055    | 5,397        | 0,4266667       | 10,40526  | 26,569368    | 63,025372    | 1,007567568              |
| 25      | 7   | A        | 5         | 56,002       | 42,764999    | 51,039787      | 0,465          | 90,083107     | 65,93          | -0,77        | 57,61        |              | 1            | 14,497       | 9,38         | 12,884318    | 5,885        | 0,4433333       | 10,508553 | 25,886575    | 63,604871    | 1,087337802              |
| 25      | 7   | A        | 6         | 60,631       | 43,745003    | 38,128811      | 0,455006       | 67,562325     | 69,56          | -2           | 57,28        |              |              | 13,906       | 9,42         | 12,926318    | 5,416        | 0,455           | 8,9327242 | 22,935462    | 68,131814    | 1,040132515              |
| 25      | 7   | A        | 7         | 51,727       | 41,682503    | 45,034683      | 0,422493       | 105,117       |                |              |              |              |              |              |              |              | 5,193        | 0,4233333       | 10,039244 |              |              | 1,01359796               |
| 25      | 7   | A        | 8         | 58,601       | 42,842499    | 31,673325      | 0,327492       | 97,580704     | 65,82          | 0,59         | 62,12        |              |              | 14,454       | 9,41         | 13,473262    | 5,593        | 0,4191667       | 9,5442057 | 24,665108    | 65,790686    | 0,764409191              |
| 25      | 7   | A        | 9         | 54,677       | 41,122505    | 43,533405      | 0,447498       | 101,32257     | 64,49          | 1,79         | 62,13        |              |              | 15,318       | 9,45         | 13,515262    | 5,576        | 0,445           | 10,198072 | 28,015436    | 61,786492    | 1,088207054              |
| 25      | 7   | A        | 10        | 56,562       | 42,467499    | 48,33749       | 0,410007       | 101,35313     | 62,57          | 3,78         | 62,22        |              |              | 14,452       | 9,38         | 13,922809    | 5,893        | 0,4491667       | 10,418656 | 25,550723    | 64,030621    | 0,965460669              |
| 25      | 7   | A        | 11        | 60,864       | 43,1875      | 54,492722      | 0,499996       | 75,062088     | 64,57          | 2,04         | 58,19        |              |              | 15,324       | 9,42         | 13,964809    | 6,438        | 0,46            | 10,577681 | 25,177445    | 64,244874    | 1,15773314               |
| 25      | 7   | A        | 12        | 58,068       | 43,239998    | 51,039787      | 0,457493       | 105,08692     | 65,6           | -0,53        | 55,31        |              |              | 13,781       | 9,41         | 13,585771    | 6,011        | 0,4533333       | 10,351657 | 23,73252     | 65,915823    | 1,058031964              |
| 25      | 7   | A        | 13        | 52,328       | 41,417503    | 45,184811      | 0,419998       | 101,34348     | 66,57          | 3,17         | 63,43        |              |              | 15,032       | 9,45         | 13,627771    | 5,228        | 0,425           | 9,9908271 | 28,726494    | 61,282678    | 1,014059201              |
| 25      | 7   | A        | 14        | 60,419       | 43,642502    | 39,179707      | 0,467491       | 82,536789     | 67,25          | -2,58        | 52,62        |              |              | 14,292       | 9,41         |              | 5,411        | 0,4116667       | 8,9557921 | 23,654811    | 67,389397    | 1,071182857              |
| 25      | 7   | A        | 15        | 61,057       | 43,139999    | 50,139019      | 0,48           | 86,321396     | 66,75          | -3,07        | 53,72        |              |              | 14,203       | 9,45         |              | 5,974        | 0,45            | 9,7842999 | 23,26187     | 66,95383     | 1,112656493              |

Supplementary Table S1. Raw data of egg quality parameters with ATOL (Animal Trait Ontology for Livestock) descriptors, for hen.

|            |     |          |           | ATOL_<br>0001880 | ATOL_<br>0002297 | ATOL_<br>0002119  | ATOL_<br>0002126  | ATOL_<br>0002122 | ATOL_<br>0002074  | ATOL_<br>0002073 | ATOL_<br>0002075 | ATOL_<br>0005600 | ATOL_<br>0005600 | ATOL_<br>0001883 | ATOL_<br>0005587 | ATOL_<br>0001938 | ATOL_<br>1881   | ATOL_<br>0002121   | ATOL_<br>1881 | ATOL_<br>0001883 | ATOL_<br>0001882 | ATOL_<br>0002125             |
|------------|-----|----------|-----------|------------------|------------------|-------------------|-------------------|------------------|-------------------|------------------|------------------|------------------|------------------|------------------|------------------|------------------|-----------------|--------------------|---------------|------------------|------------------|------------------------------|
| Hen<br>age | Pen | Genotype | Replicate | Egg<br>weight    | Egg<br>diameter  | Shell<br>strength | Shell<br>fracture | Shell<br>modulus | Yolk<br>lightness | Yolk<br>redness  | Yolk<br>yellow   | Blood<br>spot    | Meat spot        | Yolk<br>weight   | Albumen<br>pH    | Albumen<br>DM    | Shell<br>weight | Shell<br>thickness | Shell         | Yolk             | Albumen          | Shell-to-egg-<br>compression |
| wk         | no. |          |           | g                | mm               | N                 | mm                | N/mm             | L*                | a*               | b*               | 1=present        | 1=present        | g                | -                | % (w/w)          | g               | mm                 | % (w/w)       | % (w/w)          | % (w/w)          | %                            |
| 25         | 8   | D        | 1         | 57,875           | 43,387497        | 61,39859          | 0,467495          | 101,36282        | 66,45             | -2,53            | 53,27            |                  |                  | 13,509           | 9,33             | 14,269922        | 6,25            | 0,4641667          | 10,799136     | 23,341685        | 65,859179        | 1,07748783                   |
| 25         | 8   | D        | 2         | 58,894           | 42,995003        | 59,597061         | 0,43499           | 105,0769         | 69,92             | -2,99            | 53,35            |                  |                  | 13,619           | 9,37             | 14,311922        | 6,302           | 0,475              | 10,700581     | 23,124597        | 66,174823        | 1,011722223                  |
| 25         | 8   | D        | 3         | 60,004           | 43,370003        | 54,042339         | 0,44001           | 90,074501        | 63                | -3,98            | 53,69            |                  |                  | 11,981           | 9,36             | 13,327059        | 6,224           | 0,4633333          | 10,372642     | 19,967002        | 69,660356        | 1,014549157                  |
| 25         | 8   | D        | 4         | 60,038           | 44,197502        | 56,894764         | 0,445             | 78,830231        | 57,71             | 0,99             | 64,22            |                  |                  | 12,551           | 9,4              | 13,369059        | 6,172           | 0,4666667          | 10,280156     | 20,905093        | 68,814751        | 1,006844233                  |
| 25         | 8   | D        | 5         | 55,003           | 41,607498        | 54,642849         | 0,407505          | 120,1108         | 63,23             | 1,25             | 54,57            |                  |                  | 12,616           | 9,39             | 13,20711         | 5,929           | 0,465              | 10,779412     | 22,936931        | 66,283657        | 0,979402799                  |
| 25         | 8   | D        | 6         | 57,049           | 43,772499        | 59,296806         | 0,447514          | 86,321404        | 57,5              | 2,32             | 60,92            |                  |                  | 14,734           | 9,43             | 13,24911         | 6,068           | 0,46               | 10,63647      | 25,826921        | 63,536609        | 1,022363379                  |
| 25         | 8   | D        | 7         | 57,87            | 43,567497        | 56,294254         | 0,450001          | 101,33382        | 66,37             | -2,31            | 52,86            |                  |                  | 13,656           | 9,31             | 13,682443        | 5,983           | 0,4508333          | 10,33869      | 23,597719        | 66,063591        | 1,03288238                   |
| 25         | 8   | D        | 8         | 59,648           | 43,394997        | 53,892212         | 0,410004          | 90,09169         | 67,45             | -2,78            | 56,6             |                  |                  | 13,734           | 9,35             | 13,724443        | 6,466           | 0,4791667          | 10,840263     | 23,02508         | 66,134657        | 0,944818593                  |
| 25         | 8   | D        | 9         | 59,391           | 44,017502        | 59,296806         | 0,464989          | 82,584045        | 66,21             | -1,53            | 54,94            |                  |                  | 15,297           | 9,3              | 13,915358        | 6,171           | 0,4508333          | 10,390463     | 25,756428        | 63,853109        | 1,056372985                  |
| 25         | 8   | D        | 10        | 55,127           | 43,110001        | 60,948208         | 0,429989          | 105,07689        | 61,26             | -3,78            | 51,09            |                  |                  | 13,407           | 9,34             | 13,957358        | 6,361           | 0,5                | 11,53881      | 24,320206        | 64,140984        | 0,997422849                  |
| 25         | 8   | D        | 11        | 56,257           | 42,445007        | 58,245911         | 0,422504          | 131,3837         | 66,28             | -1,75            | 56,22            |                  |                  | 12,11            | 9,33             | 13,158916        | 6,389           | 0,495              | 11,356809     | 21,52621         | 67,116981        | 0,995415079                  |
| 25         | 8   | D        | 12        | 58,232           | 42,747498        | 51,039787         | 0,397495          | 108,8504         | 61,68             | -2,61            | 44,93            |                  |                  | 12,124           | 9,37             | 13,200916        | 6,16            | 0,4725             | 10,578376     | 20,820168        | 68,601456        | 0,929867287                  |
| 25         | 8   | D        | 13        | 57,468           | 42,635002        | 49,988892         | 0,439991          | 112,60388        | 65,14             | -2,25            | 50,45            |                  |                  | 12,517           | 9,37             | 13,119467        | 5,927           | 0,445              | 10,313566     | 21,780817        | 67,905617        | 1,031994792                  |
| 25         | 8   | D        | 14        | 64,45            | 45,252502        | 58,245911         | 0,442497          | 63,808846        | 58,04             | 1,7              | 62,19            |                  |                  | 14,291           | 9,41             | 13,161467        | 6,573           | 0,4766667          | 10,198604     | 22,173778        | 67,627618        | 0,977839855                  |
| 25         | 8   | D        | 15        | 58,793           | 43,6175          | 53,742085         | 0,445007          | 90,083084        | 69,96             | -3,25            | 49,85            |                  |                  | 12,616           | 9,31             |                  | 6,323           | 0,4725             | 10,754682     | 21,458337        | 67,786981        | 1,020248753                  |
| 25         | 9   | D        | 1         | 56,855           | 43               | 44,584301         | 0,404991          | 97,590027        | 64,33             | 2,02             | 58,55            |                  |                  | 14,519           | 9,23             | 13,047182        | 5,45            | 0,4191667          | 9,5857884     | 25,536892        | 64,877319        | 0,941839535                  |
| 25         | 9   | D        | 2         | 56,51            | 42,792503        | 60,497826         | 0,470005          | 101,34348        | 66,83             | 1,98             | 56,39            |                  |                  | 12,169           | 9,27             | 13,089182        | 6,07            | 0,4616667          | 10,741462     | 21,534242        | 67,724297        | 1,098334912                  |
| 25         | 9   | D        | 3         | 54,405           | 42,095001        | 50,28915          | 0,395004          | 112,59312        | 68,91             | -2,52            | 52               |                  |                  | 12,931           | 9,31             | 13,609042        | 5,733           | 0,45               | 10,537634     | 23,768036        | 65,69433         | 0,938363204                  |
| 25         | 9   | D        | 4         | 58,99            | 43,782501        |                   | 0,462494          | 82,568306        | 66,42             | -0,327           | 52,51            |                  |                  | 13,883           | 9,35             | 13,651042        | 6,088           | 0,4566667          | 10,320393     | 23,534497        | 66,145109        | 1,056344406                  |
| 25         | 9   | D        | 5         | 55,39            | 42,352501        | 60,197571         | 0,467499          | 120,13369        | 64,94             | 3,81             | 57,56            |                  |                  | 12,305           | 9,36             | 13,257454        | 5,805           | 0,4666667          | 10,480231     | 22,215201        | 67,304568        | 1,103828555                  |
| 25         | 9   | D        | 6         | 59,358           | 43,695           | 45,935448         | 0,419998          | 78,822708        | 64,69             | 0,21             | 61,59            |                  | 1                | 12,685           | 9,4              | 13,299454        | 5,776           | 0,4391667          | 9,7307861     | 21,370329        | 68,898885        | 0,961203799                  |
| 25         | 9   | D        | 7         | 55,668           | 42,8825          | 53,141575         | 0,452492          | 105,08692        | 67,28             | 1                | 55,23            |                  |                  | 13,462           | 9,36             | 13,667549        | 5,643           | 0,4366667          | 10,136883     | 24,182654        | 65,680463        | 1,055190346                  |
| 25         | 9   | D        | 8         | 56,778           | 43,157501        | 57,795528         | 0,470001          | 105,08692        | 57,56             | 1,3              | 63,89            |                  |                  | 13,258           | 9,4              | 13,709549        | 6,195           | 0,4725             | 10,910916     | 23,350594        | 65,73849         | 1,089036643                  |
| 25         | 9   | D        | 9         | 62,75            | 43,827499        | 54,642849         | 0,454994          | 75,054924        | 65,43             | -0,31            | 56,29            |                  |                  | 14,224           | 9,33             | 12,768648        | 6,702           | 0,4733333          | 10,680478     | 22,667729        | 66,651793        | 1,038147306                  |
| 25         | 9   | D        | 10        | 58,969           | 43,445           | 61,548717         | 0,452492          | 93,872375        | 63,63             | 2,17             | 58,93            |                  |                  | 12,488           | 9,37             | 12,810648        | 6,277           | 0,4766667          | 10,644576     | 21,177229        | 68,178195        | 1,041528369                  |
| 25         | 9   | D        | 11        | 56,297           | 43,077499        | 56,744637         | 0,477505          | 97,571396        | 55,53             | 3,48             | 57,5             |                  |                  | 12,171           | 9,36             | 12,922316        | 5,891           | 0,4475             | 10,464146     | 21,619269        | 67,916585        | 1,10847893                   |
| 25         | 9   | D        | 12        | 56,084           | 41,417503        | 44,133915         | 0,382484          | 112,61462        | 61,07             | -5,33            | 38,99            |                  |                  | 12,117           | 9,4              | 12,964316        | 5,948           | 0,455              | 10,60552      | 21,605092        | 67,789387        | 0,923483968                  |
| 25         | 9   | D        | 13        | 58,43            | 42,552498        | 52,090679         | 0,429996          | 116,35733        | 62,75             | 2,34             | 51,21            |                  |                  | 13,084           | 9,33             | 13,185286        | 6,129           | 0,4625             | 10,489475     | 22,392607        | 67,117919        | 1,010507068                  |
| 25         | 9   | D        | 14        | 61,63            | 44,195           | 52,390934         | 0,409985          | 71,315773        | 61,98             | 3,64             | 58,19            |                  |                  | 12,721           | 9,37             | 13,227286        | 6,265           | 0,4533333          | 10,165504     | 20,640922        | 69,193575        | 0,927672814                  |
| 25         | 9   | D        | 15        | 55,464           | 42,450005        | 51,340042         | 0,419998          | 105,0769         | 65,94             | -1,52            | 52,53            |                  |                  | 12,39            | 9,39             |                  | 5,887           | 0,45               | 10,614092     | 22,338814        | 67,047094        | 0,989394465                  |
| 25         | 11  | C        | 1         | 55,573           | 43,222504        | 46,38583          | 0,46249           | 93,845512        | 59,19             | 0,28             | 53,18            |                  |                  | 12,571           | 9,42             | 13,760015        | 5,206           | 0,3983333          | 9,3678585     | 22,620697        | 68,011444        | 1,070021302                  |
| 25         | 11  | C        | 2         | 57,845           | 42,252502        | 39,630089         | 0,3825            | 105,07689        | 62,96             | 7,28             | 60,98            |                  |                  | 13,572           | 9,44             | 13,780015        | 5,721           | 0,4258333          | 9,8902239     | 23,462702        | 66,647074        | 0,905271835                  |
| 25         | 11  | C        | 3         | 55,73            | 41,610001        | 49,988892         | 0,450005          | 93,827606        | 60,22             | 8,31             | 57,42            |                  |                  | 13,607           | 9,46             | 14,209385        | 5,787           | 0,4466667          | 10,383994     | 24,415934        | 65,200072        | 1,081482791                  |
| 25         | 11  | C        | 4         | 58,878           | 42,782501        |                   | 0,447502          | 67,562325        | 59,81             | -0,93            | 45,73            |                  |                  | 13,268           | 9,48             | 14,229385        | 5,585           | 0,425              | 9,4857162     | 22,534733        | 67,979551        | 1,04599308                   |
| 25         | 11  | C        | 5         | 54,2             | 42,537506        | 40,680981         | 0,41              | 105,11698        | 62,44             | -1,06            | 50,62            |                  |                  | 13,231           | 9,39             | 13,699467        | 4,944           | 0,3866667          | 9,1217712     | 24,411439        | 66,46679         | 0,963855286                  |
| 25         | 11  | C        | 6         | 59,997           | 43,332497        | 37,378174         | 0,382504          | 101,33382        | 65,63             | 1,53             | 60,81            | 1                |                  | 13,237           | 9,43             | 13,741467        | 5,85            | 0,4275             | 9,7504875     | 22,06277         | 68,186743        | 0,882718575                  |
| 25         | 11  | C        | 7         | 58,333           | 43,529999        | 57,044891         | 0,43248           | 93,854462        | 66,04             | -3,79            | 47,19            |                  |                  | 12,386           | 9,36             | 13,566265        | 6,277           | 0,4666667          | 10,760633     | 21,233264        | 68,006103        | 0,993521732                  |
| 25         | 11  | C        | 8         | 57,376           | 43,510002        | 49,688637         | 0,452496          | 93,818657        | 60,75             | 4,22             | 55,26            |                  |                  | 13,977           | 9,4              | 13,608265        | 5,264           | 0,4158333          | 9,1745678     | 24,36036         | 66,465073        | 1,039981566                  |
| 25         | 11  | C        | 9         | 58,275           | 43,485001        | 48,33749          | 0,4575            | 82,576172        | 69,33             | -1,15            | 63,59            |                  |                  | 14,598           | 9,36             | 13,778027        | 5,67            | 0,42               | 9,7297297     | 25,050193        | 65,220077        | 1,052086902                  |
| 25         | 11  | C        | 10        | 53,719           | 42,512497        | 40,831108         | 0,392502          | 105,10696        | 59,97             | 5,32             | 59,02            |                  |                  | 13,664           | 9,4              | 13,820027        | 4,949           | 0,4183333          | 9,2127553     | 25,436065        | 65,351179        | 0,923262635                  |
| 25         | 11  | C        | 11        | 60,229           | 43,93            | 40,831108         | 0,40749           | 78,837746        | 65,61             | 1,13             | 59,02            |                  |                  | 13,698           | 9,4              | 13,637285        | 5,693           | 0,4125             | 9,4522572     | 22,743197        | 67,804546        | 0,927589347                  |
| 25         | 11  | C        | 12        | 59,719           | 43,447502        | 46,535957         | 0,414989          | 86,329636        | 64,54             | 0,4              | 57,6             | 1                |                  | 13,037           | 9,46             | 13,697285        | 6,01            | 0,4375             | 10,063799     | 21,830573        | 68,105628        | 0,955150425                  |
| 25         | 11  | C        | 13        | 60,099           | 44,5075          | 56,744637         | 0,427494          | 86,321396        | 55,71             | 2,9              | 51,42            |                  |                  | 13,053           | 9,35             | 13,7353          | 5,898           | 0,445              | 9,8138072     | 21,719163        | 68,467029        | 0,960498792                  |
| 25         | 11  | C        | 14        | 58,254           | 43,805           | 37,228046         | 0,39999           | 75,062096        | 54,31             | 4,01             | 60,31            |                  |                  | 15,224           | 9,39             | 13,7773          | 5,156           | 0,4091667          | 8,8508944     | 26,133828        | 65,015278        | 0,913114941                  |
| 25         | 11  | C        | 15        | 60,443           | 44,482498        | 51,49017          | 0,439991          | 82,57618         | 58,4              | 3,49             | 53,31            |                  | 1                | 13,704           | 9,44             |                  | 5,848           | 0,4341667          | 9,6752312     | 22,672601        | 67,652168        | 0,98913285                   |



Supplementary Table S1. Raw data of egg quality parameters with ATOL (Animal Trait Ontology for Livestock) descriptors, for hen.

| Hen<br>age | Pen | Genotype | Replicate | ATOL_<br>0001880 | ATOL_<br>0002297 | ATOL_<br>0002119  | ATOL_<br>0002126  | ATOL_<br>0002122 | ATOL_<br>0002074  | ATOL_<br>0002073 | ATOL_<br>0002075 | ATOL_<br>0005600 | ATOL_<br>0005600 | ATOL_<br>0001883 | ATOL_<br>0005587 | ATOL_<br>0001938 | ATOL_<br>1881   | ATOL_<br>0002121   | ATOL_<br>1881 | ATOL_<br>0001883 | ATOL_<br>0001882 | ATOL_<br>0002125             |
|------------|-----|----------|-----------|------------------|------------------|-------------------|-------------------|------------------|-------------------|------------------|------------------|------------------|------------------|------------------|------------------|------------------|-----------------|--------------------|---------------|------------------|------------------|------------------------------|
|            |     |          |           | Egg<br>weight    | Egg<br>diameter  | Shell<br>strength | Shell<br>fracture | Shell<br>modulus | Yolk<br>lightness | Yolk<br>redness  | Yolk<br>yellow   | Blood<br>spot    | Meat spot        | Yolk<br>weight   | Albumen<br>pH    | Albumen<br>DM    | Shell<br>weight | Shell<br>thickness | Shell         | Yolk             | Albumen          | Shell-to-egg-<br>compression |
|            |     |          |           | g                | mm               | N                 | mm                | N/mm             | L*                | a*               | b*               | 1=present        | 1=present        | g                | -                | % (w/w)          | g               | mm                 | % (w/w)       | % (w/w)          | % (w/w)          | %                            |
| 25         | 12  | B        | 1         | 61,178           | 42,735001        | 38,879452         | 0,397491          | 101,34348        | 56,05             | 4,14             | 49,59            |                  |                  | 12,684           | 9,4              | 13,362905        | 5,711           | 0,4366667          | 9,3350551     | 20,732943        | 69,932002        | 0,930129848                  |
| 25         | 12  | B        | 2         | 57,331           | 41,912498        | 35,8769           | 0,362492          | 112,6146         | 58,66             | 8,3              | 55,84            | 1                |                  | 13,506           | 9,42             | 13,382905        | 5,593           | 0,4433333          | 9,7556296     | 23,557935        | 66,686435        | 0,864878061                  |
| 25         | 12  | B        | 3         | 63,235           | 43,532501        | 40,981236         | 0,399994          | 82,576172        | 62,16             | 1,59             | 57,77            | 1                |                  | 14,649           | 9,37             | 13,314624        | 6,015           | 0,4325             | 9,5121373     | 23,165968        | 67,321895        | 0,918839926                  |
| 25         | 12  | B        | 4         | 61,08            | 43,705002        | 23,566435         | 0,324986          | 67,549438        | 52,19             | 7,98             | 59,25            |                  | 1                | 12,828           | 9,39             | 13,334624        | 3,968           | 0,3166667          | 6,4963982     | 21,001965        | 72,501637        | 0,743589944                  |
| 25         | 12  | B        | 5         | 58,77            | 43,342499        | 52,240807         | 0,469994          | 97,580711        | 66,48             | -1,36            | 53,03            | 1                |                  | 13,986           | 9,34             | 13,605374        | 5,663           | 0,4216667          | 9,6358686     | 23,797856        | 66,566275        | 1,084372177                  |
| 25         | 12  | B        | 6         | 55,93            | 41,57            | 46,686085         | 0,470005          | 93,83654         | 60,83             | 5,88             | 56,87            |                  |                  | 14,607           | 9,38             | 13,647374        | 5,569           | 0,4325             | 9,9570892     | 26,116574        | 63,926336        | 1,130635073                  |
| 25         | 12  | B        | 7         | 57,901           | 42,860001        | 42,632641         | 0,447498          | 90,091698        | 60,91             | -0,48            | 56,13            |                  |                  | 13,789           | 9,37             | 13,245444        | 5,3             | 0,3966667          | 9,1535552     | 23,814787        | 67,031657        | 1,044092369                  |
| 25         | 12  | B        | 8         | 56,652           | 42,402496        | 46,535957         | 0,41              | 101,3628         | 65,32             | 2,46             | 62,24            |                  |                  | 14,045           | 9,41             | 13,287444        | 5,743           | 0,4558333          | 10,13733      | 24,791711        | 65,07096         | 0,966924211                  |
| 25         | 12  | B        | 9         | 54,945           | 41,824997        | 40,680981         | 0,417492          | 108,84003        | 57,05             | 6,93             | 56,32            |                  |                  | 14,332           | 9,39             | 13,72147         | 5,182           | 0,4083333          | 9,4312494     | 26,084266        | 64,484484        | 0,998187758                  |
| 25         | 12  | B        | 10        | 61,215           | 44,160004        | 43,983788         | 0,4575            | 71,315788        | 61,26             | 2,4              | 54,73            |                  | 1                | 14,193           | 9,43             | 13,76347         | 5,568           | 0,4133333          | 9,0958099     | 23,185494        | 67,718696        | 1,036005341                  |
| 25         | 12  | B        | 11        | 57,552           | 42,517502        | 41,581749         | 0,402504          | 93,836563        | 63,76             | -0,5             | 53,47            |                  |                  | 13,267           | 9,36             | 13,113989        | 5,506           | 0,4175             | 9,5670003     | 23,052196        | 67,380803        | 0,946678382                  |
| 25         | 12  | B        | 12        | 60,481           | 44,559998        | 41,131363         | 0,419994          | 64,063576        | 56,44             | 5,54             | 61,35            |                  |                  | 14,08            | 9,42             | 13,173989        | 5,242           | 0,3941667          | 8,6671847     | 23,280038        | 68,052777        | 0,942535949                  |
| 25         | 12  | B        | 13        | 59,616           | 43,862503        | 44,584301         | 0,402493          | 78,837738        | 58,5              | 7,77             | 58,16            |                  |                  | 14,038           | 9,33             | 13,541146        | 5,468           | 0,4191667          | 9,1720344     | 23,54737         | 67,280596        | 0,917624332                  |
| 25         | 12  | B        | 14        | 59,953           | 43,709999        | 50,589405         | 0,422497          | 82,591919        | 59,63             | 5,61             | 61,16            |                  |                  | 12,941           | 9,37             | 13,583146        | 5,766           | 0,4366667          | 9,6175337     | 21,585242        | 68,797224        | 0,966591191                  |
| 25         | 12  | B        | 15        | 59,905           | 42,389999        | 48,037235         | 0,412495          | 101,32414        | 60,88             | 8,4              | 59,34            |                  |                  | 13,863           | 9,35             |                  | 5,989           | 0,4583333          | 9,997496      | 23,141641        | 66,860863        | 0,973095093                  |
| 30         | 1   | C        | 1         | 66,697           | 45,737503        | 38,128586         | 0,364986          | 71,308983        | 52,84             | 0,09             | 50,71            | 1                |                  | 16,772           | 9,5              | 13,401196        | 6,43            | 0,4383333          | 9,6406135     | 25,146558        | 65,212828        | 0,798001587                  |
| 30         | 1   | C        | 2         | 66,51            | 46,375           | 38,578968         | 0,342495          | 105,0769         | 58,2              | -0,67            | 63,34            | 1                |                  | 16,673           | 9,52             | 13,421196        | 6,488           | 0,44               | 9,7549241     | 25,068411        | 65,176665        | 0,738533693                  |
| 30         | 1   | C        | 3         | 59,281           | 43,697502        | 49,988667         | 0,424995          | 75,076408        | 63,81             | 1,38             | 56,54            |                  |                  | 14,946           | 9,53             | 13,739506        | 5,758           | 0,4166667          | 9,7130615     | 25,212125        | 65,074813        | 0,972584199                  |
| 30         | 1   | C        | 4         | 65,021           | 44,1325          | 44,734203         | 0,389992          | 63,802773        | 70,02             | -4,3             | 51,54            |                  |                  | 15,891           | 9,55             | 13,759506        | 6,42            | 0,445              | 9,8737331     | 24,439796        | 65,686471        | 0,88368436                   |
| 30         | 1   | C        | 5         | 67,681           | 44,762501        | 26,268505         | 0,309998          | 60,043949        | 63,42             | 0,1              | 56,16            |                  |                  | 15,751           | 9,42             | 13,900971        | 5,557           | 0,3825             | 8,2105761     | 23,27241         | 68,517014        | 0,692539499                  |
| 30         | 1   | C        | 6         | 63,978           | 44,735001        | 46,68586          | 0,399986          | 63,802773        | 56,49             | 2,36             | 64,95            |                  |                  | 16,614           | 9,46             | 13,942971        | 5,91            | 0,4133333          | 9,2375504     | 25,968302        | 64,794148        | 0,89412315                   |
| 30         | 1   | C        | 7         | 66,381           | 45,517502        | 54,792751         | 0,449993          | 71,315773        | 59,58             | 0,71             | 58,69            |                  |                  | 16,005           | 9,54             | 13,275089        | 6,523           | 0,4391667          | 9,826607      | 24,110815        | 66,062578        | 0,988615324                  |
| 30         | 1   | C        | 8         | 65,341           | 44,872501        | 51,640072         | 0,41              | 78,830215        | 65,62             | -4,31            | 48,58            |                  |                  | 16,335           | 9,58             | 13,317089        | 6,536           | 0,4441667          | 10,002908     | 24,999617        | 64,997475        | 0,913699907                  |
| 30         | 1   | C        | 9         | 60,39            | 43,2075          | 40,530628         | 0,422493          | 67,568764        | 56,18             | 0,41             | 60,61            |                  |                  | 15,581           | 9,54             | 13,094942        | 6,198           | 0,4516667          | 10,263289     | 25,800629        | 63,936082        | 0,977823295                  |
| 30         | 1   | C        | 10        | 57,769           | 43,5825          | 44,283817         | 0,379986          | 75,069237        | 60,55             | -2,59            | 56,5             |                  | 1                | 14,219           | 9,58             | 13,136942        | 5,648           | 0,4016667          | 9,7768699     | 24,613547        | 65,609583        | 0,871877474                  |
| 30         | 1   | C        | 11        | 64,473           | 44,252502        | 45,034458         | 0,382488          | 60,055401        | 67,15             | -3,65            | 49,68            |                  |                  | 16,492           | 9,53             | 13,908473        | 6,546           | 0,4533333          | 10,153087     | 25,5797          | 64,267213        | 0,86433079                   |
| 30         | 1   | C        | 12        | 64,663           | 44,800003        | 46,986115         | 0,382484          | 75,062096        | 62,2              | -1,8             | 47,21            |                  |                  | 15,778           | 9,59             | 13,968473        | 6,338           | 0,445              | 9,8015867     | 24,400353        | 65,798061        | 0,853758871                  |
| 30         | 1   | C        | 13        | 62,89            | 45,475002        | 47,436497         | 0,419998          | 75,069244        | 59,67             | -0,52            | 56,42            |                  |                  | 13,807           | 9,48             | 13,848159        | 5,595           | 0,4                | 8,8964859     | 21,954206        | 69,149308        | 0,923579948                  |
| 30         | 1   | C        | 14        | 55,852           | 42,975002        | 36,777439         | 0,447502          | 60,061119        | 64,65             | -1,85            | 56,71            |                  |                  | 16,497           | 9,52             | 13,890159        | 4,77            | 0,375              | 8,5404283     | 29,536991        | 61,922581        | 1,041307689                  |
| 30         | 1   | C        | 15        | 60,015           | 43,785004        | 44,433945         | 0,414989          | 63,802773        | 55,98             | 2,38             | 47,79            |                  | 1                | 14,268           | 9,52             |                  | 5,791           | 0,4208333          | 9,6492544     | 23,774056        | 66,576689        | 0,947787969                  |
| 30         | 2   | D        | 1         | 60,786           | 43,6525          | 47,286369         | 0,397488          | 71,322594        | 56,62             | -0,61            | 60,19            |                  |                  | 15,446           | 9,61             | 13,086961        | 5,889           | 0,425              | 9,6880861     | 25,410456        | 64,901458        | 0,910573278                  |
| 30         | 2   | D        | 2         | 63,275           | 44,775002        | 59,596836         | 0,402489          | 82,584045        | 56,84             | -3,13            | 56,21            |                  |                  | 16,239           | 9,63             | 13,106961        | 6,47            | 0,4508333          | 10,225207     | 25,664164        | 64,110628        | 0,898914533                  |
| 30         | 2   | D        | 3         | 58,967           | 43,572502        | 54,492496         | 0,435001          | 75,06208         | 69,94             | -5,62            | 47,53            |                  |                  | 16,527           | 9,55             | 13,292398        | 6,038           | 0,455              | 10,239626     | 28,027541        | 61,732834        | 0,998338356                  |
| 30         | 2   | D        | 4         | 59,391           | 43,650002        | 55,693516         | 0,402485          | 86,321404        | 68,56             | -4,8             | 44,06            |                  |                  | 15,605           | 9,57             | 13,312398        | 6,488           | 0,475              | 10,924214     | 26,275025        | 62,800761        | 0,922073268                  |
| 30         | 2   | D        | 5         | 63,334           | 43,397503        | 48,787647         | 0,444996          | 67,55188         | 61,9              | -3,91            | 49,53            |                  |                  | 13,337           | 9,53             | 13,027206        | 6,637           | 0,4916667          | 10,479363     | 21,058199        | 68,462437        | 1,025395401                  |
| 30         | 2   | D        | 6         | 62,394           | 44,095001        | 54,192242         | 0,432491          | 63,802773        | 66,78             | 2,05             | 55,9             |                  |                  | 16,546           | 9,57             | 13,069206        | 6,573           | 0,4758333          | 10,534667     | 26,518576        | 62,946758        | 0,980816397                  |
| 30         | 2   | D        | 7         | 63,861           | 44,727501        | 48,937775         | 0,432499          | 67,562325        | 69,6              | -3,37            | 54,29            |                  |                  | 15,641           | 9,38             | 13,358765        | 6,038           | 0,4216667          | 9,4549099     | 24,492257        | 66,052833        | 0,966964374                  |
| 30         | 2   | D        | 8         | 56,821           | 43,122505        |                   |                   |                  | 61,03             | -3,54            | 44,5             |                  |                  | 12,194           | 9,42             | 13,400765        | 5,147           | 0,4083333          | 9,0582707     | 21,460376        | 69,481354        |                              |
| 30         | 2   | D        | 9         | 63,517           | 44,467499        | 52,991219         | 0,399986          | 86,321404        | 69,91             | -0,47            | 52,28            |                  |                  | 14,216           | 9,42             | 13,120609        | 6,416           | 0,4516667          | 10,101233     | 22,38141         | 67,517358        | 0,899501904                  |
| 30         | 2   | D        | 10        | 64,037           | 44,7225          | 53,741859         | 0,429993          | 75,06208         | 67,21             | -0,29            | 53,03            |                  |                  | 14,398           | 9,46             | 13,162609        | 6,131           | 0,4425             | 9,5741524     | 22,483877        | 67,941971        | 0,961469059                  |
| 30         | 2   | D        | 11        | 57,203           | 43,34            | 44,433945         | 0,409985          | 75,062096        | 68,56             | -2,64            | 54,5             |                  |                  | 16,21            | 9,49             | 13,273995        | 5,568           | 0,4241667          | 9,7337552     | 28,337675        | 61,92857         | 0,945973696                  |
| 30         | 2   | D        | 12        | 56,167           | 43,072502        | 52,841091         | 0,4375            | 75,076408        | 65,38             | -2,78            | 52,28            |                  |                  |                  | 9,55             | 13,333995        | 6,13            | 0,4541667          | 10,913882     |                  |                  | 1,015729246                  |
| 30         | 2   | D        | 13        | 63,162           | 43,639999        | 57,495049         | 0,457489          | 67,555885        | 65,7              | -3,04            | 50,96            |                  |                  | 13,183           | 9,56             | 12,93295         | 6,534           | 0,4283333          | 10,344828     | 20,871727        | 68,783446        | 1,048324955                  |
| 30         | 2   | D        | 14        | 59,963           | 43,767502        | 60,797855         | 0,444996          | 75,053894        | 63,7              | -2,83            | 57,89            |                  |                  | 14,878           | 9,6              | 12,97495         | 6,262           | 0,4641667          | 10,443107     | 24,811967        | 64,744926        | 1,016726977                  |
| 30         | 2   | D        | 15        | 63,2             | 44,612499        | 54,942879         | 0,414993          | 78,830231        | 69,07             | -2,71            | 53,82            |                  |                  | 16,188           | 9,53             |                  | 6,609           | 0,4716667          | 10,457278     | 25,613924        | 63,928797        | 0,930216888                  |



Supplementary Table S1. Raw data of egg quality parameters with ATOL (Animal Trait Ontology for Livestock) descriptors, for hen.

|            |     |          |           | ATOL_<br>0001880 | ATOL_<br>0002297 | ATOL_<br>0002119  | ATOL_<br>0002126  | ATOL_<br>0002122 | ATOL_<br>0002074  | ATOL_<br>0002073 | ATOL_<br>0002075 | ATOL_<br>0005600 | ATOL_<br>0005600 | ATOL_<br>0001883 | ATOL_<br>0005587 | ATOL_<br>0001938 | ATOL_<br>1881   | ATOL_<br>0002121   | ATOL_<br>1881 | ATOL_<br>0001883 | ATOL_<br>0001882 | ATOL_<br>0002125             |
|------------|-----|----------|-----------|------------------|------------------|-------------------|-------------------|------------------|-------------------|------------------|------------------|------------------|------------------|------------------|------------------|------------------|-----------------|--------------------|---------------|------------------|------------------|------------------------------|
| Hen<br>age | Pen | Genotype | Replicate | Egg<br>weight    | Egg<br>diameter  | Shell<br>strength | Shell<br>fracture | Shell<br>modulus | Yolk<br>lightness | Yolk<br>redness  | Yolk<br>yellow   | Blood<br>spot    | Meat spot        | Yolk<br>weight   | Albumen<br>pH    | Albumen<br>DM    | Shell<br>weight | Shell<br>thickness | Shell         | Yolk             | Albumen          | Shell-to-egg-<br>compression |
| wk         | no. |          |           | g                | mm               | N                 | mm                | N/mm             | L*                | a*               | b*               | 1=present        | 1=present        | g                | -                | % (w/w)          | g               | mm                 | % (w/w)       | % (w/w)          | % (w/w)          | %                            |
| 30         | 3   | B        | 1         | 67,663           | 45,275002        | 43,53318          | 0,464996          | 60,055397        | 67,21             | -0,28            | 58,6             | 1                |                  | 17,247           | 9,5              | 13,690281        | 5,955           | 0,4091667          | 8,8009695     | 25,489559        | 65,709472        | 1,027047994                  |
| 30         | 3   | B        | 2         | 64,756           | 45,462502        | 43,833435         | 0,459995          | 78,822708        |                   |                  |                  |                  | 1                |                  | 9,52             | 13,710281        | 5,673           | 0,405              | 8,7605782     |                  |                  | 1,011811888                  |
| 30         | 3   | B        | 3         | 58,607           | 43,032501        | 39,479736         | 0,394997          | 75,062096        | 63,77             | -0,56            | 48,44            |                  |                  | 14,923           | 9,5              | 13,31008         | 5,33            | 0,3975             | 9,0944768     | 25,462829        | 65,442695        | 0,917903889                  |
| 30         | 3   | B        | 4         | 60,86            | 43,430004        | 39,329609         | 0,477497          | 63,802773        | 57,99             | -1,15            | 64,45            |                  |                  | 18,449           | 9,52             | 13,33008         | 5,128           | 0,3908333          | 8,4258955     | 30,313835        | 61,260269        | 1,099463403                  |
| 30         | 3   | B        | 5         | 64,134           | 44,132504        | 36,777439         | 0,412487          | 52,54847         | 62,42             | 2,72             | 58,05            |                  |                  | 17,062           | 9,47             | 12,821713        | 5,52            | 0,3891667          | 8,6069791     | 26,603674        | 64,789347        | 0,934655781                  |
| 30         | 3   | B        | 6         | 57,082           | 43,715004        | 44,13369          | 0,432491          | 71,315781        | 69,62             | -1,43            | 59,96            |                  |                  | 16,135           | 9,51             | 12,863713        | 5,067           | 0,3933333          | 8,8767037     | 28,266354        | 62,856943        | 0,98934224                   |
| 30         | 3   | B        | 7         | 63,578           | 44,432503        |                   |                   |                  | 64,95             | -1,62            | 59,51            |                  |                  | 18,614           | 9,52             | 13,155044        | 5,671           | 0,4008333          | 8,9197521     | 29,277423        | 61,802825        |                              |
| 30         | 3   | B        | 8         | 56,295           | 42,8675          | 34,225269         | 0,382488          | 63,814945        | 64,96             | -0,74            | 55,5             |                  |                  | 15,285           | 9,56             | 13,197044        | 5,143           | 0,4133333          | 9,1358025     | 27,151612        | 63,712585        | 0,892256371                  |
| 30         | 3   | B        | 9         | 59,68            | 42,577499        | 32,723991         | 0,397491          | 71,308983        | 63,38             | 2,27             | 58,54            |                  |                  | 14,837           | 9,57             | 13,39831         | 5,271           | 0,4025             | 8,8321046     | 24,860925        | 66,306971        | 0,93357057                   |
| 30         | 3   | B        | 10        | 63,184           | 44,1325          | 35,426289         | 0,404987          | 48,790363        | 68,35             | -0,67            | 57,16            |                  |                  | 16,452           | 9,61             | 13,44031         | 5,363           | 0,3766667          | 8,4879083     | 26,038238        | 65,473854        | 0,917661587                  |
| 30         | 3   | B        | 11        | 59,671           | 43,442501        | 42,632416         | 0,427498          | 71,315781        | 60,23             | -1               | 63,87            | 1                |                  | 14,774           | 9,53             |                  | 5,86            | 0,435              | 9,8205158     | 24,759096        | 65,420388        | 0,984054762                  |
| 30         | 3   | B        | 12        | 66,695           | 45,067501        | 30,622206         | 0,382484          | 52,54847         | 65,68             | 0,26             | 60,55            |                  |                  | 15,789           | 9,59             |                  | 5,476           | 0,3933333          | 8,2105105     | 23,673439        | 68,116051        | 0,848691389                  |
| 30         | 3   | B        | 13        | 66,27            | 42,782501        | 33,624756         | 0,419998          | 71,322578        | 68,65             | -0,48            | 64,36            |                  |                  | 15,441           | 9,55             | 13,159901        | 5,858           | 0,4158333          | 8,8395956     | 23,300136        | 67,860269        | 0,981705113                  |
| 30         | 3   | B        | 14        | 65,133           | 42,632504        | 36,176929         | 0,452499          | 67,562325        | 67,37             | -0,87            | 59,77            |                  |                  | 14,977           | 9,59             | 13,201901        | 5,933           | 0,4183333          | 9,1090538     | 22,994488        | 67,896458        | 1,061394376                  |
| 30         | 3   | B        | 15        | 67,204           | 45,172501        | 30,321951         | 0,389988          | 63,808853        | 62,1              | 0,14             | 53,19            |                  |                  | 15,734           | 9,54             |                  | 5,527           | 0,3975             | 8,2242128     | 23,412297        | 68,36349         | 0,863330547                  |
| 30         | 4   | A        | 1         | 59,345           | 43,834999        | 46,385605         | 0,409985          | 67,555878        | 66,5              | -0,92            | 58,07            |                  | 1                | 16,171           | 9,48             | 14,216232        | 5,902           | 0,4383333          | 9,9452355     | 27,249136        | 62,805628        | 0,935291455                  |
| 30         | 4   | A        | 2         | 64,098           | 44,424999        | 52,540836         | 0,417484          | 75,054924        | 58,85             | -3,35            | 47,03            |                  |                  | 14,043           | 9,24             | 15,178704        | 6,073           | 0,4416667          | 9,4745546     | 21,90864         | 68,616806        | 0,939750162                  |
| 30         | 4   | A        | 3         | 58,774           | 42,387501        | 43,232925         | 0,479996          | 41,230125        | 65,89             | -0,67            | 56,23            |                  |                  | 16,385           | 9,62             | 13,648355        | 6,025           | 0,4466667          | 10,251131     | 27,877973        | 61,870895        | 1,132399855                  |
| 30         | 4   | A        | 4         | 60,055           | 43,8125          |                   | 0,367493          | 45,009125        | 67,04             | 0,41             | 62,68            | 1                | 1                | 13,916           | 9,28             | 15,220704        | 3,441           | 0,2925             | 5,7297477     | 23,172092        | 71,09816         | 0,838785735                  |
| 30         | 4   | A        | 5         | 64,055           | 43,877502        | 53,591732         | 0,429993          | 67,568771        | 59,36             | -0,89            | 64,27            |                  |                  | 17,233           | 9,57             | 13,887339        | 6,739           | 0,4791667          | 10,520646     | 26,903442        | 62,575911        | 0,979985141                  |
| 30         | 4   | A        | 6         | 56,91            | 42,845001        | 43,833435         | 0,499989          | 67,557503        | 65,64             | 1,14             | 58,97            |                  |                  | 16,068           | 9,61             | 13,929339        | 5,267           | 0,4                | 9,254964      | 28,234054        | 62,510982        | 1,166971615                  |
| 30         | 4   | A        | 7         | 55,062           | 42,07            | 55,693516         | 0,48              | 97,580711        | 64,19             | 2,29             | 58,24            |                  |                  | 15,922           | 9,55             | 14,184934        | 6,147           | 0,5025             | 11,163779     | 28,916494        | 59,919727        | 1,14095555                   |
| 30         | 4   | A        | 8         | 59,388           | 43,8675          | 46,08535          | 0,424992          | 71,315781        | 64,77             | -1,76            | 51,91            |                  |                  | 16,262           | 9,59             | 14,226934        | 5,587           | 0,4208333          | 9,4076244     | 27,382636        | 63,209739        | 0,968808343                  |
| 30         | 4   | A        | 9         | 64,094           | 45,055           | 61,69862          | 0,414986          | 82,584053        | 62,1              | 4,67             | 57,93            |                  |                  | 17,242           | 9,56             | 14,041029        | 6,989           | 0,4991667          | 10,904297     | 26,901114        | 62,194589        | 0,921065365                  |
| 30         | 4   | A        | 10        | 64,09            | 43,852501        | 51,18969          | 0,439987          | 71,315781        | 66,82             | -2,11            | 52,32            |                  |                  | 15,882           | 9,6              | 14,613146        | 6,661           | 0,4766667          | 10,393197     | 24,780777        | 64,826026        | 1,003333881                  |
| 30         | 4   | A        | 11        | 60,926           | 43,7425          | 54,192242         | 0,457493          | 67,549438        | 69                | 2,83             | 64,15            |                  | 1                | 17,385           | 9,64             | 14,655146        | 6,39            | 0,4633333          | 10,488133     | 28,534616        | 60,977251        | 1,045877579                  |
| 30         | 4   | A        | 12        | 65,065           | 44,635002        | 47,736755         | 0,369987          | 67,562317        | 62,51             | 2,88             | 58,47            |                  |                  | 16,831           | 9,39             | 14,802175        | 6,563           | 0,46               | 10,086836     | 25,867978        | 64,045186        | 0,828916732                  |
| 30         | 4   | A        | 13        | 57,179           | 42,837502        | 51,790199         | 0,489994          | 71,322586        | 64,76             | 3,11             | 59,06            |                  |                  | 16,323           | 9,58             | 13,821221        | 5,437           | 0,4175             | 9,5087357     | 28,547194        | 61,94407         | 1,143843542                  |
| 30         | 4   | A        | 14        | 62,986           | 44,68            | 60,047218         | 0,45499           | 71,308983        | 58,55             | 0,42             | 61,35            |                  |                  | 15,374           | 9,62             | 13,863221        | 6,606           | 0,4758333          | 10,488045     | 24,408599        | 65,103356        | 1,018330349                  |
| 30         | 4   | A        | 15        | 64,099           | 45,107502        | 53,441605         | 0,454994          | 63,821037        |                   |                  |                  |                  |                  |                  | 9,57             |                  | 6,581           | 0,4583333          | 10,266931     |                  | 89,733069        | 1,008688089                  |
| 30         | 5   | B        | 1         | 68,844           | 45,485001        | 40,380501         | 0,402489          | 60,055397        | 67,62             | -3,84            | 53,23            |                  |                  | 16,149           | 9,58             | 12,766079        | 6,658           | 0,4216667          | 9,6711405     | 23,457382        | 66,871478        | 0,884882909                  |
| 30         | 5   | B        | 2         | 65,341           | 44,642502        | 48,487392         | 0,450001          | 67,55587         | 71,15             | -3,89            | 58,21            | 1                |                  | 16,253           | 9,6              | 12,786079        | 6,191           | 0,4325             | 9,4749086     | 24,874122        | 65,65097         | 1,008010259                  |
| 30         | 5   | B        | 3         | 64,65            | 45,045002        | 37,528076         | 0,422485          | 60,061111        | 63,45             | 1,2              | 59,48            |                  |                  | 16,4             | 9,53             | 13,979637        | 5,168           | 0,37               | 7,9938128     | 25,367363        | 66,638824        | 0,937917596                  |
| 30         | 5   | B        | 4         | 65,128           | 45,060001        | 36,327057         | 0,412491          | 63,808853        | 64,3              | -2,37            | 51,86            |                  |                  | 17,205           | 9,55             | 13,999637        | 5,391           | 0,3816667          | 8,2775458     | 26,417209        | 65,305245        | 0,915426078                  |
| 30         | 5   | B        | 5         | 62,456           | 43,997501        | 31,372845         | 0,392494          | 56,279167        | 64,53             | -1,56            | 56,92            |                  |                  | 16,161           | 9,56             | 13,500545        | 5,525           | 0,3883333          | 8,8462277     | 25,875817        | 65,277956        | 0,892082484                  |
| 30         | 5   | B        | 6         | 64,196           | 44,495003        | 34,525524         | 0,399986          | 56,263069        | 63,17             | -1,59            | 49,22            |                  |                  | 15,962           | 9,6              | 13,542545        | 5,854           | 0,3966667          | 9,1189482     | 24,864478        | 66,016574        | 0,898945888                  |
| 30         | 5   | B        | 7         | 57,814           | 42,93            | 30,472078         | 0,449993          | 63,773735        | 64,16             | -2,2             | 53,44            | 1                |                  | 14,795           | 9,57             | 13,110628        | 4,569           | 0,35               | 7,9029301     | 25,590687        | 66,506383        | 1,048201724                  |
| 30         | 5   | B        | 8         | 64,419           | 44,147499        | 46,235477         | 0,439999          | 67,549431        |                   |                  |                  |                  |                  |                  | 9,61             | 13,152628        | 6,067           | 0,425              | 9,4180288     |                  |                  | 0,996656685                  |
| 30         | 5   | B        | 9         | 67,926           | 44,137501        | 42,632416         | 0,482498          | 52,525967        | 65,71             | 0,13             | 53,74            |                  |                  | 16,082           | 9,5              | 13,528618        | 6,252           | 0,4283333          | 9,2041339     | 23,675765        | 67,120101        | 1,093170182                  |
| 30         | 5   | B        | 10        | 65,549           | 45,162502        | 40,830883         | 0,454998          | 56,285835        | 58,1              | 2,08             | 53,03            |                  |                  |                  | 9,54             | 13,570618        | 5,232           | 0,3741667          | 7,9818151     |                  |                  | 1,007468541                  |
| 30         | 5   | B        | 11        | 61,6             | 43,352501        | 33,174377         | 0,40749           | 63,80278         | 60,23             | 4,54             | 57,24            | 1                |                  | 15,305           | 9,55             | 13,519921        | 5,478           | 0,3941667          | 8,8928571     | 24,845779        | 66,261364        | 0,939945772                  |
| 30         | 5   | B        | 12        | 61,075           | 43,845001        | 46,235477         | 0,465             | 67,562325        | 64,49             | -3,27            | 47,3             |                  |                  | 17,771           | 9,61             | 13,579921        | 6,696           | 0,4116667          | 10,963569     | 29,097012        | 59,939419        | 1,060554201                  |
| 30         | 5   | B        | 13        | 65,445           | 44,342503        | 49,988667         | 0,462482          | 60,061119        | 67,06             | -0,63            | 57,44            |                  |                  | 16,888           | 9,64             | 13,452971        | 6,22            | 0,4216667          | 9,5041638     | 25,804874        | 64,690962        | 1,042976758                  |
| 30         | 5   | B        | 14        | 63,638           | 44,32            |                   |                   |                  | 58,98             | 3,47             | 62,68            | 1                |                  | 15,615           | 9,68             | 13,494971        | 5,747           | 0,4108333          | 9,0307678     | 24,537226        | 66,432006        |                              |
| 30         | 5   | B        | 15        | 60,48            | 43,162502        | 39,029354         | 0,467487          | 63,804153        | 65,25             | -2,59            | 57,44            | 1                | 1                | 17,034           | 9,58             |                  | 5,475           | 0,4091667          | 9,0525794     | 28,164683        | 62,782738        | 1,083085962                  |

Supplementary Table S1. Raw data of egg quality parameters with ATOL (Animal Trait Ontology for Livestock) descriptors, for hen.

|            |     |          |           | ATOL_<br>0001880 | ATOL_<br>0002297 | ATOL_<br>0002119  | ATOL_<br>0002126  | ATOL_<br>0002122 | ATOL_<br>0002074  | ATOL_<br>0002073 | ATOL_<br>0002075 | ATOL_<br>0005600 | ATOL_<br>0005600 | ATOL_<br>0001883 | ATOL_<br>0005587 | ATOL_<br>0001938 | ATOL_<br>1881   | ATOL_<br>0002121   | ATOL_<br>1881 | ATOL_<br>0001883 | ATOL_<br>0001882 | ATOL_<br>0002125             |
|------------|-----|----------|-----------|------------------|------------------|-------------------|-------------------|------------------|-------------------|------------------|------------------|------------------|------------------|------------------|------------------|------------------|-----------------|--------------------|---------------|------------------|------------------|------------------------------|
| Hen<br>age | Pen | Genotype | Replicate | Egg<br>weight    | Egg<br>diameter  | Shell<br>strength | Shell<br>fracture | Shell<br>modulus | Yolk<br>lightness | Yolk<br>redness  | Yolk<br>yellow   | Blood<br>spot    | Meat spot        | Yolk<br>weight   | Albumen<br>pH    | Albumen<br>DM    | Shell<br>weight | Shell<br>thickness | Shell         | Yolk             | Albumen          | Shell-to-egg-<br>compression |
| wk         | no. |          |           | g                | mm               | N                 | mm                | N/mm             | L*                | a*               | b*               | 1=present        | 1=present        | g                | -                | % (w/w)          | g               | mm                 | % (w/w)       | % (w/w)          | % (w/w)          | %                            |
| 30         | 6   | C        | 1         | 54,587           | 42,510002        | 44,283817         | 0,46249           | 75,069244        | 59,67             | -2,48            | 55,02            |                  |                  | 14,179           | 9,59             | 13,100632        | 5,362           | 0,4175             | 9,8228516     | 25,975049        | 64,202099        | 1,087955724                  |
| 30         | 6   | C        | 2         | 64,563           | 46,022499        | 50,138794         | 0,449993          | 90,074516        | 62,39             | -0,17            | 58,1             |                  |                  | 14,853           | 9,61             | 13,120632        | 6,314           | 0,4425             | 9,7795951     | 23,005437        | 67,214968        | 0,977767418                  |
| 30         | 6   | C        | 3         | 62,499           | 44,7075          | 52,841091         | 0,439999          | 67,562317        | 60,53             | 0,79             | 63,22            |                  |                  | 14,981           | 9,57             | 14,487397        | 6,139           | 0,4241667          | 9,8225572     | 23,969984        | 66,207459        | 0,984172678                  |
| 30         | 6   | C        | 4         | 60,425           | 43,32            | 36,777439         | 0,394993          | 78,809563        | 62,41             | 1,59             | 58,2             |                  |                  | 14,215           | 9,59             | 14,507397        | 5,769           | 0,4208333          | 9,5473728     | 23,525031        | 66,927596        | 0,911802862                  |
| 30         | 6   | C        | 5         | 62,858           | 44,57            | 50,739307         | 0,469997          | 75,020142        | 62,74             | 2,91             | 58,63            |                  |                  | 15,496           | 9,57             | 13,961609        | 5,924           | 0,4291667          | 9,4244169     | 24,652391        | 65,923192        | 1,054514247                  |
| 30         | 6   | C        | 6         | 57,271           | 42,872505        | 31,973354         | 0,439987          | 56,301941        | 60,45             | 0,06             | 53,05            |                  |                  | 15,72            | 9,61             | 14,003609        | 5,002           | 0,3708333          | 8,7339142     | 27,448447        | 63,817639        | 1,026268467                  |
| 30         | 6   | C        | 7         | 58,423           | 42,762501        | 39,479736         | 0,452496          | 67,562325        | 62,07             | 0,15             | 50,57            |                  |                  | 16,51            | 9,58             | 13,608738        | 5,319           | 0,4091667          | 9,1042911     | 28,259418        | 62,636291        | 1,058160747                  |
| 30         | 6   | C        | 8         | 55,683           | 42,227501        | 34,075142         | 0,4175            | 71,315781        | 65,21             | -0,69            | 53,67            |                  |                  | 15,177           | 9,62             | 13,650738        | 4,871           | 0,3683333          | 8,7477327     | 27,256075        | 63,996193        | 0,98869218                   |
| 30         | 6   | C        | 9         | 61,181           | 45,1175          | 47,436497         | 0,432491          | 67,549431        | 57,23             | -2,98            | 52,95            |                  | 1                | 15,419           | 9,59             | 13,963962        | 5,791           | 0,415              | 9,4653569     | 25,202269        | 65,332374        | 0,958588131                  |
| 30         | 6   | C        | 10        | 64,248           | 45,025002        | 46,986115         | 0,40749           | 63,808853        | 65,55             | -0,69            | 51,01            |                  |                  | 14,991           | 9,63             | 14,005962        | 6,276           | 0,445              | 9,7683975     | 23,333022        | 66,898581        | 0,905030498                  |
| 30         | 6   | C        | 11        | 57,704           | 43,465           | 49,688412         | 0,44249           | 78,830231        | 68,91             | -2,7             | 50,65            |                  |                  | 16,111           | 9,41             | 14,408122        | 5,977           | 0,4483333          | 10,358034     | 27,920075        | 61,721891        | 1,018037501                  |
| 30         | 6   | C        | 12        | 63,173           | 44,080006        | 34,225269         | 0,427498          | 52,543453        | 65,07             | -3,2             | 50,67            |                  | 1                | 14,902           | 9,47             | 14,468122        | 5,155           | 0,3775             | 8,1601317     | 23,589192        | 68,250677        | 0,969822917                  |
| 30         | 6   | C        | 13        | 59,515           | 43,295002        | 43,53318          | 0,502491          | 60,066845        | 53,57             | 3,52             | 47,47            |                  | 1                | 14,014           | 9,54             | 13,129893        | 5,749           | 0,4166667          | 9,6597496     | 23,547005        | 66,793245        | 1,160621265                  |
| 30         | 6   | C        | 14        | 63,844           | 45,732506        | 44,13369          | 0,455002          | 71,322586        | 64,3              | -1,86            | 53,68            |                  |                  | 16,332           | 9,58             | 13,171893        | 5,672           | 0,3891667          | 8,8841551     | 25,581104        | 65,534741        | 0,994920331                  |
| 30         | 6   | C        | 15        | 60,433           | 43,3125          | 48,937775         | 0,437489          | 86,321396        | 66,73             | 0,9              | 57,34            |                  |                  | 14,129           | 9,66             |                  | 5,998           | 0,4316667          | 9,925041      | 23,37961         | 66,695349        | 1,010075613                  |
| 30         | 7   | A        | 1         | 56,799           | 42,822502        | 42,932671         | 0,467503          | 71,30336         |                   |                  |                  |                  |                  |                  |                  |                  | 5,402           | 0,4308333          | 9,5107308     | 0                | 90,489269        | 1,091722758                  |
| 30         | 7   | A        | 2         | 56,711           | 41,895           | 37,678204         | 0,432487          | 93,814041        | 67,21             | -0,36            | 60,16            |                  |                  | 16,537           | 9,66             | 13,303499        | 5,024           | 0,3925             | 8,8589515     | 29,160128        | 61,980921        | 1,032311732                  |
| 30         | 7   | A        | 3         | 60,512           | 43,139999        |                   |                   |                  | 66,35             | -0,75            | 60,02            |                  |                  | 17,266           | 9,68             | 13,323499        | 5,72            | 0,4191667          | 9,4526705     | 28,533184        | 62,014146        |                              |
| 30         | 7   | A        | 4         | 57,579           | 42,695           | 45,48484          | 0,464989          | 75,076393        | 66,26             | -2,03            | 52,19            |                  |                  | 13,818           | 9,39             | 13,935313        | 5,298           | 0,41               | 9,2012713     | 23,998333        | 66,800396        | 1,089094742                  |
| 30         | 7   | A        | 5         | 58,243           | 43,760002        | 52,540836         | 0,442501          | 75,069244        | 63,04             | -1,68            | 51,92            |                  | 1                | 15,393           | 9,41             | 13,955313        | 5,927           | 0,4516667          | 10,17633      | 26,428927        | 63,394743        | 1,01119968                   |
| 30         | 7   | A        | 6         | 59,201           | 43,52            | 38,428841         | 0,482498          | 56,268688        | 66,51             | -2,27            | 54,77            |                  |                  | 14,621           | 9,5              | 14,123968        | 5,18            | 0,405              | 8,7498522     | 24,697218        | 66,55293         | 1,108681066                  |
| 30         | 7   | A        | 7         | 57,487           | 42,834999        | 48,63752          | 0,464985          | 71,315773        | 66,79             | -0,26            | 59,69            |                  |                  | 14,029           | 9,54             | 14,165968        | 5,922           | 0,445              | 10,301459     | 24,403778        | 65,294762        | 1,08552588                   |
| 30         | 7   | A        | 8         | 57,514           | 42,279999        | 40,98101          | 0,442497          | 78,822701        | 67,28             | -3,34            | 58,01            |                  |                  | 16,82            | 9,6              | 13,333816        | 5,714           | 0,4366667          | 9,9349724     | 29,245053        | 60,819974        | 1,046587064                  |
| 30         | 7   | A        | 9         | 56,731           | 42,222504        | 36,477184         | 0,427494          | 75,069244        | 57,54             | -3,39            | 43,24            |                  |                  | 16,104           | 9,64             | 13,375816        | 5,649           | 0,4333333          | 9,9575188     | 28,386596        | 61,655885        | 1,012479033                  |
| 30         | 7   | A        | 10        | 59,489           | 43,290001        | 52,841091         | 0,499989          | 63,808853        | 52,99             | -2,98            | 42,14            |                  |                  | 15,756           | 9,6              | 14,103294        | 5,725           | 0,4141667          | 9,6236279     | 26,485569        | 63,890803        | 1,154975718                  |
| 30         | 7   | A        | 11        | 60,475           | 44,502502        | 39,179482         | 0,449993          | 60,049873        | 58,95             | -0,31            | 67,82            |                  |                  | 16,604           | 9,64             | 14,145294        | 5,44            | 0,4125             | 8,9954527     | 27,455974        | 63,548574        | 1,011163372                  |
| 30         | 7   | A        | 12        | 60,078           | 43,322502        | 43,53318          | 0,447498          | 71,292099        | 66,79             | -0,85            | 57,1             |                  |                  | 17,373           | 9,62             | 14,208042        | 5,845           | 0,4358333          | 9,7290189     | 28,917407        | 61,353574        | 1,032945881                  |
| 30         | 7   | A        | 13        | 55,309           | 42,900002        | 27,91991          | 0,439991          | 56,256931        | 55,71             | -1,54            | 60,18            |                  | 1                | 16,455           | 9,68             | 14,268042        | 4,238           | 0,3433333          | 7,6624058     | 29,751035        | 62,586559        | 1,025619999                  |
| 30         | 7   | A        | 14        | 59,261           | 42,487499        | 51,489944         | 0,502499          | 86,265152        | 63,17             | -0,99            | 56,82            |                  | 1                | 17,289           | 9,54             | 13,648065        | 5,54            | 0,4108333          | 9,3484754     | 29,174331        | 61,477194        | 1,182698469                  |
| 30         | 7   | A        | 15        | 55,589           | 41,955002        | 48,337265         | 0,467499          | 78,762703        | 55,9              | 0,67             | 64,05            |                  |                  | 16,648           | 9,58             | 13,690065        | 5,86            | 0,455              | 10,541654     | 29,948371        | 59,509975        | 1,114286683                  |
| 30         | 8   | D        | 1         | 59,619           | 43,510002        | 48,787647         | 0,477497          | 71,277565        | 70,3              | -6,92            | 52,55            |                  | 1                | 15,768           | 9,62             | 13,067182        | 5,856           | 0,4333333          | 9,8223721     | 26,447944        | 63,729683        | 1,097441917                  |
| 30         | 8   | D        | 2         | 57,469           | 43,23            | 49,238029         | 0,504993          | 71,255058        | 69,71             | -1,64            | 62,18            |                  |                  | 14,341           | 9,64             | 13,087182        | 6,041           | 0,4416667          | 10,511754     | 24,954323        | 64,533923        | 1,16815406                   |
| 30         | 8   | D        | 3         | 61,856           | 43,702503        | 36,777439         | 0,382488          | 67,534195        | 67,82             | -1,99            | 55,18            |                  |                  | 15,936           | 9,55             | 13,584633        | 5,709           | 0,4125             | 9,2295008     | 25,763063        | 65,007437        | 0,875208452                  |
| 30         | 8   | D        | 4         | 56,2             | 43,027504        | 60,497601         | 0,469986          | 75,069237        | 63,84             | 1,04             | 56,63            |                  |                  | 15,352           | 9,57             | 13,604633        | 5,965           | 0,4558333          | 10,613879     | 27,316726        | 62,069395        | 1,092292037                  |
| 30         | 8   | D        | 5         | 61,218           | 44,555           | 52,841091         | 0,46999           | 7,495672         | 67,29             | -1,58            | 58,66            |                  | 1                | 13,193           | 9,47             | 14,244335        | 6,02            | 0,4441667          | 9,833709      | 21,550851        | 68,61544         | 1,054853552                  |
| 30         | 8   | D        | 6         | 59,425           | 43,830002        | 53,591732         | 0,469994          | 75,025757        | 69,25             | -2,55            | 57,29            |                  |                  | 15,908           | 9,51             | 14,286335        | 5,798           | 0,4375             | 9,7568363     | 26,769878        | 63,473286        | 1,072311153                  |
| 30         | 8   | D        | 7         | 63,476           | 46,275002        | 50,439053         | 0,452496          | 116,35169        | 67,97             | -3,19            | 50,07            |                  |                  | 14,47            | 9,45             | 13,561343        | 5,878           | 0,42               | 9,2601928     | 22,796017        | 67,94379         | 0,977841125                  |
| 30         | 8   | D        | 8         | 51,954           | 41,460003        | 50,288921         | 0,427486          | 108,84003        | 69,65             | -4,94            | 30,59            |                  |                  | 14,113           | 9,49             | 13,603343        | 5,326           | 0,4416667          | 10,251376     | 27,164415        | 62,584209        | 1,031080485                  |
| 30         | 8   | D        | 9         | 53,21            | 41,370007        | 50,138794         | 0,454983          | 97,590019        | 65,83             | -4,43            | 50,2             |                  |                  | 14,787           | 9,52             | 10,096773        | 5,258           | 0,4158333          | 9,8816012     | 27,789889        | 62,32851         | 1,099789517                  |
| 30         | 8   | D        | 10        | 55,048           | 43,41            | 53,741859         | 0,479992          | 75,04673         | 70,02             | -1,71            | 59,46            |                  |                  | 13,271           | 9,56             | 10,138773        | 5,546           | 0,4291667          | 10,074844     | 24,108051        | 65,817105        | 1,105717577                  |
| 30         | 8   | D        | 11        | 56,274           | 42,702499        | 37,978458         | 0,432491          | 86,295876        | 66,71             | 0,31             | 46,34            |                  |                  | 13,742           | 9,48             | 13,518164        | 5,199           | 0,4183333          | 9,2387248     | 24,419803        | 66,341472        | 1,012800211                  |
| 30         | 8   | D        | 12        | 62,532           | 44,137501        | 58,095558         | 0,457493          | 67,555885        | 65,5              | -1,15            | 52,71            |                  |                  | 15,038           | 9,54             | 13,578164        | 6,149           | 0,4591667          | 9,8333653     | 24,048487        | 66,118148        | 1,036517677                  |
| 30         | 8   | D        | 13        | 59,56            | 43,375           | 50,889435         | 0,419994          | 82,584045        | 67,81             | 1,41             | 57,36            |                  |                  | 15,762           | 9,58             | 12,524721        | 6,423           | 0,47               | 10,784083     | 26,46407         | 62,751847        | 0,968285879                  |
| 30         | 8   | D        | 14        | 59,379           | 43,41            | 58,54594          | 0,439999          | 82,568298        | 61,99             | -0,29            | 56,3             |                  |                  | 16,826           | 9,62             | 12,566721        | 6,638           | 0,4741667          | 11,179036     | 28,336617        | 60,484346        | 1,013589035                  |
| 30         | 8   | D        | 15        | 58,833           | 44,220001        | 45,184586         | 0,447498          | 63,814945        | 69,39             | -4,03            | 51,5             |                  |                  | 15,727           | 9,55             |                  | 5,39            | 0,4083333          | 9,161525      | 26,731596        | 64,106879        | 1,011980981                  |

Supplementary Table S1. Raw data of egg quality parameters with ATOL (Animal Trait Ontology for Livestock) descriptors, for hen.

|            |     |          |           | ATOL_<br>0001880 | ATOL_<br>0002297 | ATOL_<br>0002119  | ATOL_<br>0002126  | ATOL_<br>0002122 | ATOL_<br>0002074  | ATOL_<br>0002073 | ATOL_<br>0002075 | ATOL_<br>0005600 | ATOL_<br>0005600 | ATOL_<br>0001883 | ATOL_<br>0005587 | ATOL_<br>0001938 | ATOL_<br>1881   | ATOL_<br>0002121   | ATOL_<br>1881 | ATOL_<br>0001883 | ATOL_<br>0001882 | ATOL_<br>0002125             |
|------------|-----|----------|-----------|------------------|------------------|-------------------|-------------------|------------------|-------------------|------------------|------------------|------------------|------------------|------------------|------------------|------------------|-----------------|--------------------|---------------|------------------|------------------|------------------------------|
| Hen<br>age | Pen | Genotype | Replicate | Egg<br>weight    | Egg<br>diameter  | Shell<br>strength | Shell<br>fracture | Shell<br>modulus | Yolk<br>lightness | Yolk<br>redness  | Yolk<br>yellow   | Blood<br>spot    | Meat spot        | Yolk<br>weight   | Albumen<br>pH    | Albumen<br>DM    | Shell<br>weight | Shell<br>thickness | Shell         | Yolk             | Albumen          | Shell-to-egg-<br>compression |
| wk         | no. |          |           | g                | mm               | N                 | mm                | N/mm             | L*                | a*               | b*               | 1=present        | 1=present        | g                | -                | % (w/w)          | g               | mm                 | % (w/w)       | % (w/w)          | % (w/w)          | %                            |
| 30         | 9   | D        | 1         | 60,981           | 43,490002        | 55,543388         | 0,432491          | 93,836555        | 60,83             | -0,31            | 60,26            |                  |                  | 13,151           | 9,51             | 13,958136        | 6,483           | 0,4675             | 10,63118      | 21,565734        | 67,803086        | 0,99446075                   |
| 30         | 9   | D        | 2         | 57,761           | 44,0975          | 49,388157         | 0,43499           | 60,055389        | 62,3              | -4,64            | 46,88            |                  |                  | 14,644           | 9,53             | 13,978136        | 5,664           | 0,44               | 9,8059244     | 25,352747        | 64,841329        | 0,986427802                  |
| 30         | 9   | D        | 3         | 59,465           | 43,522499        | 58,846195         | 0,427486          | 90,083092        | 67,98             | -4,86            | 44,63            |                  |                  | 14,21            | 9,62             | 12,861972        | 6,49            | 0,4741667          | 10,913983     | 23,89641         | 65,189607        | 0,982218415                  |
| 30         | 9   | D        | 4         | 58,54            | 43,587502        | 59,596836         | 0,457493          | 75,070778        | 63,97             | -2               | 54,19            |                  |                  | 16,014           | 9,64             | 12,881972        | 6,424           | 0,4683333          | 10,973693     | 27,355654        | 61,670653        | 1,04959674                   |
| 30         | 9   | D        | 5         | 58,652           | 43,307499        | 63,500153         | 0,489994          | 93,827606        |                   |                  |                  |                  |                  |                  | 9,54             | 13,615364        | 6,34            | 0,4741667          | 10,809521     | 0                | 89,190479        | 1,131429917                  |
| 30         | 9   | D        | 6         | 59,098           | 43,892502        | 53,591732         | 0,424995          | 71,315781        | 65,09             | -0,12            | 56,04            |                  |                  | 15,738           | 9,58             | 13,657364        | 6,243           | 0,4625             | 10,563809     | 26,630343        | 62,805848        | 0,968263327                  |
| 30         | 9   | D        | 7         | 59,951           | 42,950001        | 56,894539         | 0,46249           | 78,817078        | 68,01             | -2,98            | 50,69            |                  |                  | 14,882           | 9,61             | 13,272944        | 6,336           | 0,4575             | 10,568631     | 24,823606        | 64,607763        | 1,076810219                  |
| 30         | 9   | D        | 8         | 57,38            | 42,687504        | 53,141346         | 0,49749           | 67,494804        | 65,4              | -5,21            | 47,56            |                  |                  | 14,782           | 9,65             | 13,314944        | 5,834           | 0,4441667          | 10,167306     | 25,761589        | 64,071105        | 1,165423024                  |
| 30         | 9   | D        | 9         | 59,163           | 43,889999        | 44,13369          | 0,407482          | 71,30336         | 65,99             | -1,32            | 51,92            |                  |                  | 15,544           | 9,62             | 13,181158        | 5,646           | 0,4316667          | 9,5431266     | 26,273177        | 64,183696        | 0,928416517                  |
| 30         | 9   | D        | 10        | 60,087           | 43,0825          | 56,444157         | 0,462486          | 82,576172        | 64,18             | -1,5             | 54,5             |                  |                  | 16,16            | 9,66             | 13,223158        | 6,575           | 0,4791667          | 10,942467     | 26,894337        | 62,163197        | 1,073489236                  |
| 30         | 9   | D        | 11        | 59,247           | 43,8675          | 53,141346         | 0,452492          | 78,813354        | 69,03             | -4,92            | 33,61            |                  |                  | 16,252           | 9,48             | 12,576838        | 6,119           | 0,455              | 10,327949     | 27,430925        | 62,241126        | 1,031497122                  |
| 30         | 9   | D        | 12        | 61,077           | 44,215           | 33,174377         | 0,409988          | 52,53722         | 63,12             | -1,47            | 54,52            |                  |                  | 17,431           | 9,54             | 12,636838        | 4,878           | 0,4383333          | 7,9866398     | 28,539385        | 63,473975        | 0,92725998                   |
| 30         | 9   | D        | 13        | 59,838           | 43,4375          | 60,797855         | 0,467487          | 71,315781        | 67,51             | -0,34            | 56,82            |                  |                  | 12,961           | 9,5              | 13,61689         | 6,347           | 0,47               | 10,606972     | 21,660149        | 67,732879        | 1,076229065                  |
| 30         | 9   | D        | 14        | 61,67            | 43,697502        | 53,141346         | 0,409988          | 78,822708        | 60,78             | -1,64            | 59,73            |                  |                  | 14,752           | 9,54             | 13,65889         | 6,398           | 0,47               | 10,374574     | 23,920869        | 65,704557        | 0,938241275                  |
| 30         | 9   | D        | 15        | 60,648           | 44,1875          | 47,436497         | 0,402489          | 71,308975        | 63,62             | -2,62            | 55,44            |                  |                  | 13,458           | 9,54             |                  | 5,654           | 0,45               | 9,3226487     | 22,190344        | 68,487007        | 0,910866195                  |
| 30         | 11  | C        | 1         | 60,52            | 44,677502        | 29,721441         | 0,359985          | 71,322586        | 63,9              | 4,5              | 57,52            |                  | 1                | 14,666           | 5,58             | 13,534106        | 5,022           | 0,3683333          | 8,2980833     | 24,233311        | 67,468605        | 0,805741109                  |
| 30         | 11  | C        | 2         | 58,858           | 43,362499        | 42,031906         | 0,452496          | 71,293274        | 65,21             | -2,15            | 53,79            |                  |                  | 15,031           | 5,6              | 13,554106        | 5,374           | 0,4116667          | 9,1304496     | 25,537735        | 65,331816        | 1,043519194                  |
| 30         | 11  | C        | 3         | 61,565           | 44,415001        | 22,365189         | 0,267498          | 67,562325        | 63,83             | -1,3             | 57,72            |                  |                  | 16,52            | 9,48             | 13,821926        | 5,482           | 0,3975             | 8,90441       | 26,833428        | 64,262162        | 0,60226949                   |
| 30         | 11  | C        | 4         | 60,465           | 43,260002        | 50,739307         | 0,447491          | 82,576172        | 69,22             | -2,91            | 61,4             |                  |                  | 16,264           | 9,5              | 13,841926        | 6,038           | 0,4283333          | 9,9859423     | 26,898206        | 63,115852        | 1,034422051                  |
| 30         | 11  | C        | 5         | 61,058           | 44,120003        | 36,026802         | 0,387493          | 60,061111        | 57,95             | 2,07             | 56,82            |                  |                  | 15,038           | 9,43             | 14,230687        | 5,193           | 0,3841667          | 8,505028      | 24,629041        | 66,865931        | 0,878270566                  |
| 30         | 11  | C        | 6         | 61,556           | 43,639999        | 37,978458         | 0,407482          | 63,80278         | 64,29             | 0,8              | 58,6             |                  | 1                | 17,168           | 9,47             | 14,272687        | 5,359           | 0,3866667          | 8,7058938     | 27,890051        | 63,404055        | 0,933735127                  |
| 30         | 11  | C        | 7         | 60,739           | 44,022499        | 48,487392         | 0,402485          | 82,576172        | 64,45             | -1,86            | 54,56            |                  |                  | 17,327           | 9,56             | 13,915044        | 5,648           | 0,4125             | 9,2988031     | 28,526976        | 62,174221        | 0,914271132                  |
| 30         | 11  | C        | 8         | 61,61            | 44,3125          | 41,281265         | 0,422493          | 56,301926        | 62,81             | 0,6              | 55,3             |                  |                  | 17,016           | 9,6              | 13,957044        | 5,622           | 0,4091667          | 9,125142      | 27,618893        | 63,255965        | 0,953439774                  |
| 30         | 11  | C        | 9         | 62,388           | 44,822502        | 40,830883         | 0,41              | 56,312668        | 64,97             | -1,54            | 53,86            |                  |                  | 15,452           | 9,52             | 14,078617        | 5,4             | 0,3866667          | 8,6555107     | 24,767584        | 66,576906        | 0,914719129                  |
| 30         | 11  | C        | 10        | 60,191           | 44,82            | 40,380501         | 0,42749           | 60,055389        | 65,25             | -4,3             | 46,51            |                  | 1                | 16,681           | 9,56             | 14,120617        | 5,069           | 0,3675             | 8,4215248     | 27,713446        | 63,86503         | 0,95379295                   |
| 30         | 11  | C        | 11        | 57,481           | 42,447502        | 46,68586          | 0,449997          | 78,822708        | 67,39             | 0,02             | 54               |                  |                  | 14,647           | 9,61             | 13,77138         | 5,46            | 0,4191667          | 9,4987909     | 25,481463        | 65,019746        | 1,060125988                  |
| 30         | 11  | C        | 12        | 60,204           | 43,485001        | 41,731651         | 0,452496          | 71,304527        | 63,99             | 0,16             | 58,37            |                  |                  | 15,088           | 9,67             | 13,83138         | 5,516           | 0,4033333          | 9,1621819     | 25,061458        | 65,77636         | 1,040579486                  |
| 30         | 11  | C        | 13        | 58,084           | 43,247501        | 43,383053         | 0,462502          | 78,822708        | 66,06             | -2,69            | 48,55            |                  |                  | 14,314           | 9,6              | 14,125165        | 5,154           | 0,4016667          | 8,8733558     | 24,64362         | 66,483025        | 1,069430578                  |
| 30         | 11  | C        | 14        | 58,102           | 42,755001        | 53,141346         | 0,437485          | 90,09169         | 61,4              | -3,35            | 56,4             |                  |                  | 15,653           | 9,64             | 14,167165        | 6,307           | 0,4575             | 10,855048     | 26,940553        | 62,204399        | 1,023237024                  |
| 30         | 11  | C        | 15        | 60,305           | 43,880001        | 50,58918          | 0,452496          | 71,30217         | 65,74             | -2,35            | 58,82            |                  |                  | 14,502           | 9,59             |                  | 5,681           | 0,415              | 9,4204461     | 24,047757        | 66,531797        | 1,031212374                  |
| 30         | 12  | B        | 1         | 67,995           | 43,244999        | 34,525524         | 0,427486          | 67,555878        |                   |                  |                  |                  | 1                | 15,658           | 9,51             | 13,610448        | 6,064           | 0,4333333          | 8,9183028     | 23,028164        | 68,053533        | 0,988521239                  |
| 30         | 12  | B        | 2         | 57,887           | 42,032501        | 44,584076         | 0,422489          | 97,580704        | 63,84             | -0,1             | 58,32            |                  |                  | 16,291           | 9,53             | 13,630448        | 5,642           | 0,4241667          | 9,7465752     | 28,142761        | 62,110664        | 1,005148373                  |
| 30         | 12  | B        | 3         | 62,125           | 45,072502        | 48,787647         | 0,459999          | 56,296574        | 61,99             | -0,25            | 55,67            |                  |                  | 16,148           | 9,58             | 14,169104        | 5,581           | 0,4075             | 8,983501      | 25,992757        | 65,023742        | 1,020575694                  |
| 30         | 12  | B        | 4         | 65,408           | 45,202499        | 43,683308         | 0,447495          | 67,575203        | 63,15             | 1,49             | 64,16            |                  | 1                | 16,448           | 9,6              | 14,189104        | 5,66            | 0,4041667          | 8,6533757     | 25,146771        | 66,199853        | 0,989978452                  |
| 30         | 12  | B        | 5         | 60,288           | 44,0825          | 42,482288         | 0,399994          | 60,055401        | 63,44             | 0,95             | 57,34            |                  |                  | 15,886           | 9,57             | 13,302464        | 5,745           | 0,4708333          | 9,5292596     | 26,350186        | 64,120555        | 0,907375943                  |
| 30         | 12  | B        | 6         | 66,228           | 43,990002        | 42,932671         | 0,424999          | 60,05571         | 62,95             | -2,34            | 49,16            |                  | 1                | 15,98            | 9,61             | 13,344464        | 6,152           | 0,455              | 9,2891224     | 24,128767        | 66,58211         | 0,966126348                  |
| 30         | 12  | B        | 7         | 65,987           | 43,767502        | 44,884331         | 0,437489          | 63,7976          | 65,4              | 3,65             | 63,18            |                  |                  | 17,016           | 5,54             | 13,036912        | 6,452           | 0,4533333          | 9,7776835     | 25,786897        | 64,435419        | 0,999574981                  |
| 30         | 12  | B        | 8         | 66,804           | 45,685001        | 34,975906         | 0,467491          | 78,807678        | 62,86             | -0,25            | 57,25            |                  |                  | 15,975           | 5,58             | 13,078912        | 5,198           | 0,3766667          | 7,7809712     | 23,913239        | 68,30579         | 1,023292087                  |
| 30         | 12  | B        | 9         | 67,644           | 45,645           | 33,324501         | 0,469986          | 71,302185        |                   |                  |                  |                  |                  |                  | 9,5              | 13,512285        | 5,143           | 0,3641667          | 7,6030394     | 0                | 92,396961        | 1,029654946                  |
| 30         | 12  | B        | 10        | 62,848           | 43,122501        | 47,136242         | 0,502502          | 71,316963        | 58,71             | -0,63            | 60,07            |                  |                  | 18,614           | 9,54             | 13,554285        | 5,855           | 0,4241667          | 9,3161278     | 29,61749         | 61,066382        | 1,165289555                  |
| 30         | 12  | B        | 11        | 57,057           | 42,994999        | 42,182034         | 0,464989          | 75,063622        | 68,04             | -3,54            | 49,83            |                  |                  | 15,825           | 9,54             | 13,771209        | 4,945           | 0,3816667          | 8,6667718     | 27,735422        | 63,597806        | 1,081495548                  |
| 30         | 12  | B        | 12        | 64,435           | 45,350002        | 47,736755         | 0,477497          | 82,568291        | 63,72             | 0,28             | 56,67            |                  |                  | 16,718           | 9,6              | 13,831209        | 5,58            | 0,3958333          | 8,6598898     | 25,945526        | 65,394584        | 1,052915058                  |
| 30         | 12  | B        | 13        | 64,907           | 44,5825          | 37,227821         | 0,384998          | 63,808853        | 61,92             | 1,88             | 60,71            |                  |                  | 16,985           | 9,5              | 12,859396        | 5,906           | 0,4183333          | 9,0991727     | 26,16821         | 64,732617        | 0,863563057                  |
| 30         | 12  | B        | 14        | 60,942           | 44,115002        | 41,731651         | 0,417496          | 63,775101        | 65,38             | 2,44             | 64,51            |                  |                  | 16,185           | 9,54             | 12,901396        | 5,703           | 0,4308333          | 9,3580782     | 26,558039        | 64,083883        | 0,946381007                  |
| 30         | 12  | B        | 15        | 59,8             | 42,870007        | 36,176929         | 0,469986          | 63,808853        | 57,37             | 0,07             | 57,4             |                  | 1                | 14,938           | 9,53             |                  | 4,958           | 0,3925             | 8,2909699     | 24,979933        | 66,729097        | 1,096304929                  |

Supplementary Table S1. Raw data of egg quality parameters with ATOL (Animal Trait Ontology for Livestock) descriptors, for hen.

| Hen<br>age | Pen | Genotype | Replicate | ATOL_<br>0001880 | ATOL_<br>0002297 | ATOL_<br>0002119  | ATOL_<br>0002126  | ATOL_<br>0002122 | ATOL_<br>0002074  | ATOL_<br>0002073 | ATOL_<br>0002075 | ATOL_<br>0005600 | ATOL_<br>0005600 | ATOL_<br>0001883 | ATOL_<br>0005587 | ATOL_<br>0001938 | ATOL_<br>1881   | ATOL_<br>0002121   | ATOL_<br>1881 | ATOL_<br>0001883 | ATOL_<br>0001882 | ATOL_<br>0002125             |
|------------|-----|----------|-----------|------------------|------------------|-------------------|-------------------|------------------|-------------------|------------------|------------------|------------------|------------------|------------------|------------------|------------------|-----------------|--------------------|---------------|------------------|------------------|------------------------------|
|            |     |          |           | Egg<br>weight    | Egg<br>diameter  | Shell<br>strength | Shell<br>fracture | Shell<br>modulus | Yolk<br>lightness | Yolk<br>redness  | Yolk<br>yellow   | Blood<br>spot    | Meat spot        | Yolk<br>weight   | Albumen<br>pH    | Albumen<br>DM    | Shell<br>weight | Shell<br>thickness | Shell         | Yolk             | Albumen          | Shell-to-egg-<br>compression |
|            |     |          |           | g                | mm               | N                 | mm                | N/mm             | L*                | a*               | b*               | 1=present        | 1=present        | g                | -                | % (w/w)          | g               | mm                 | % (w/w)       | % (w/w)          | % (w/w)          | %                            |
| 38         | 1   | C        | 1         | 58,155           |                  |                   |                   |                  | 61,53             | 1,81             | 53,57            | 1                |                  | 15,804           | 9,34             | 12,840242        | 5,04            | 0,3766667          | 8,6664947     | 27,175651        | 64,157854        |                              |
| 38         | 1   | C        | 2         | 63,93            |                  |                   |                   |                  | 58,09             | 3,74             | 52,9             |                  |                  | 18,538           | 9,36             | 12,860242        | 6,264           | 0,4358333          | 9,7982168     | 28,997341        | 61,204442        |                              |
| 38         | 1   | C        | 3         | 59,285           |                  |                   |                   |                  | 65,41             | -2,89            | 53               |                  |                  | 18,324           | 9,45             | 13,596121        | 5,318           | 0,4041667          | 8,9702286     | 30,908324        | 60,121447        |                              |
| 38         | 1   | C        | 4         | 66,729           |                  |                   |                   |                  | 62,15             | -1,23            | 50,85            |                  |                  | 16,462           | 9,47             | 13,616121        | 5,676           | 0,3958333          | 8,5060468     | 24,669934        | 66,82402         |                              |
| 38         | 1   | C        | 5         | 63,403           |                  |                   |                   |                  | 62,09             | -3,71            | 54,16            |                  | 1                | 19,272           | 9,41             | 12,965316        | 6,52            | 0,455              | 10,283425     | 30,396038        | 59,320537        |                              |
| 38         | 1   | C        | 6         | 66,06            | 45,250004        | 43,232925         | 0,412483          | 90,083092        | 67,61             | -2,69            | 56,31            |                  |                  | 17,319           | 9,45             | 13,007316        | 6,328           | 0,4166667          | 9,5791705     | 26,217075        | 64,203754        | 0,91156456                   |
| 38         | 1   | C        | 7         | 66,861           | 45,585003        |                   | 0,414997          | 33,773132        | 61,53             | -2,33            | 48,65            |                  | 1                | 16,258           | 9,42             | 13,238853        | 5,182           | 0,3566667          | 7,7504076     | 24,316119        | 67,933474        | 0,910380548                  |
| 38         | 1   | C        | 8         | 66,226           | 45,147503        | 39,179482         | 0,369987          | 82,568298        | 64,43             | -1,02            | 55,84            |                  | 1                | 18,302           | 9,46             | 13,280853        | 6,324           | 0,4183333          | 9,5491197     | 27,635672        | 62,815209        | 0,819507116                  |
| 38         | 1   | C        | 9         | 63,515           | 44,005001        | 44,734203         | 0,422493          | 56,301945        | 69,86             | -4,62            | 47,28            |                  |                  | 15,466           | 9,37             | 13,571535        | 6,08            | 0,4291667          | 9,5725419     | 24,350154        | 66,077305        | 0,960102239                  |
| 38         | 1   | C        | 10        | 66,98            | 45,205006        | 44,734203         | 0,424999          | 52,548485        | 61,3              | -2,92            | 52,87            |                  |                  | 17,063           | 9,41             | 13,613535        | 6,103           | 0,4133333          | 9,1116751     | 25,474769        | 65,413556        | 0,94015915                   |
| 38         | 1   | C        | 11        | 55,299           | 42,382504        | 40,080246         | 0,462486          | 52,543468        | 65,08             | -2,92            | 49,44            |                  |                  | 15,549           | 9,43             | 12,215557        | 4,617           | 0,38               | 8,3491564     | 28,118049        | 63,532794        | 1,09121915                   |
| 38         | 1   | C        | 12        | 62,549           | 43,9575          | 25,96825          | 0,43499           | 48,755623        | 57,98             | 0,59             | 49,12            |                  | 1                | 16,531           | 9,49             | 12,275557        | 4,547           | 0,305              | 7,2695007     | 26,42888         | 66,30162         | 0,989569471                  |
| 38         | 1   | C        | 13        | 64,958           | 44,160004        | 39,329609         | 0,367489          | 67,575218        | 57,74             | 2                | 55,07            |                  |                  | 18,37            | 9,43             | 12,803729        | 6,116           | 0,4291667          | 9,4153145     | 28,279812        | 62,304874        | 0,832176102                  |
| 38         | 1   | C        | 14        | 62,988           | 44,7925          | 45,48484          | 0,392487          | 78,830231        | 64,02             | -3,11            | 49,97            |                  |                  | 18,929           | 9,47             | 12,845729        | 5,876           | 0,4275             | 9,328761      | 30,051756        | 60,619483        | 0,876233744                  |
| 38         | 1   | C        | 15        | 62,141           | 44,872501        | 48,487392         | 0,414986          | 60,055389        | 67,14             | -4,1             | 48,41            |                  | 1                | 17,989           | 9,46             |                  | 5,693           | 0,4008333          | 9,1614232     | 28,948681        | 61,889896        | 0,924811389                  |
| 38         | 2   | D        | 1         | 60,295           | 38,255001        | 52,394535         | 0,387501          | 75,06208         | 61,88             | -0,34            | 57,95            |                  |                  | 17,026           | 9,34             | 12,511266        | 6,163           | 0,43               | 10,221411     | 28,237831        | 61,540758        | 1,012942073                  |
| 38         | 2   | D        | 2         | 65,57            | 39,327499        | 50,14262          | 0,442501          | 48,790352        | 62,56             | -2,52            | 50,04            |                  |                  | 17,86            | 9,36             | 12,531266        | 6,11            | 0,4258333          | 9,3182858     | 27,238066        | 63,443648        | 1,125169439                  |
| 38         | 2   | D        | 3         | 61,545           | 38,822498        | 50,593002         | 0,347496          | 78,822708        | 66,34             | -3,49            | 49,38            |                  |                  | 16,369           | 9,33             | 13,563487        | 6,652           | 0,4716667          | 10,808352     | 26,596799        | 62,594849        | 0,895089234                  |
| 38         | 2   | D        | 4         | 68,917           | 40,130001        | 49,842365         | 0,389996          | 108,87117        | 64,72             | -3,79            | 49,41            |                  |                  | 19,069           | 9,35             | 13,583487        | 6,356           | 0,4275             | 9,2226882     | 27,669516        | 63,107796        | 0,971831523                  |
| 38         | 2   | D        | 5         | 62,193           | 38,072498        | 45,788921         | 0,409996          | 63,808853        | 66,54             | -2,94            | 47,58            |                  |                  | 21,878           | 9,11             | 12,341715        | 5,874           | 0,4308333          | 9,4447928     | 35,177592        | 55,377615        | 1,076882321                  |
| 38         | 2   | D        | 6         | 61,187           | 38,814999        |                   | 0,154995          | 82,576172        | 66,7              | -4,72            | 44,6             |                  |                  | 17,577           | 9,15             | 12,383715        | 6,269           | 0,4433333          | 10,24564      | 28,72669         | 61,027669        | 0,399317285                  |
| 38         | 2   | D        | 7         | 65,85            | 39,110001        | 52,244408         | 0,39999           | 71,315781        | 66,84             | -2,93            | 51,78            |                  |                  | 17,772           | 9,38             | 12,981147        | 6,564           | 0,4433333          | 9,9681093     | 26,98861         | 63,04328         | 1,022730733                  |
| 38         | 2   | D        | 8         | 59,535           | 37,975002        | 47,890709         | 0,444984          | 67,562317        | 72,59             | -5,19            | 46,39            |                  |                  | 17,026           | 9,42             | 13,023147        | 5,599           | 0,3941667          | 9,4045519     | 28,598304        | 61,997145        | 1,171781373                  |
| 38         | 2   | D        | 9         | 61,898           | 38,172501        | 45,488667         | 0,36499           | 71,308983        | 67,14             | -1,67            | 52,87            |                  |                  | 16,379           | 9,37             | 13,21224         | 6,103           | 0,4316667          | 9,8597693     | 26,461275        | 63,678956        | 0,956159514                  |
| 38         | 2   | D        | 10        | 59,478           | 37,987499        | 50,442875         | 0,4175            | 71,315788        | 64,55             | -1,41            | 51,43            |                  |                  | 17,352           | 9,41             | 13,25424         | 5,946           | 0,4208333          | 9,9969737     | 29,173812        | 60,829214        | 1,099045768                  |
| 38         | 2   | D        | 11        | 63,996           | 39,43            | 43,687134         | 0,397488          | 63,80278         | 65,94             | -3,93            | 50,05            |                  | 1                | 15,703           | 9,28             | 12,97588         | 5,828           | 0,41               | 9,1068192     | 24,537471        | 66,35571         | 1,008085214                  |
| 38         | 2   | D        | 12        | 66,058           | 39,657501        | 41,885601         | 0,39249           | 75,069244        | 65,07             | -3,79            | 50,15            |                  |                  | 18,101           | 9,34             | 13,03588         | 5,834           | 0,4033333          | 8,8316328     | 27,401677        | 63,76669         | 0,989699275                  |
| 38         | 2   | D        | 13        | 62,495           | 38,764999        | 40,684582         | 0,359993          | 75,069244        | 68,59             | -3,15            | 51,84            |                  |                  | 16,505           | 9,38             | 13,334482        | 5,868           | 0,4066667          | 9,3895512     | 26,410113        | 64,200336        | 0,928654738                  |
| 38         | 2   | D        | 14        | 69,159           | 41,762501        | 37,231647         | 0,3825            | 90,09169         | 65,67             | -1,53            | 54,02            |                  |                  | 17,457           | 9,42             | 13,376482        | 6,267           | 0,4108333          | 9,0617273     | 25,241834        | 65,696439        | 0,915893423                  |
| 38         | 2   | D        | 15        | 72,394           | 41,837502        | 51,794025         | 0,457489          | 86,329628        | 70,56             | -4,06            | 53,79            |                  |                  | 19,543           | 9,43             |                  | 6,697           | 0,4216667          | 9,2507666     | 26,995331        | 63,753902        | 1,093490238                  |
| 38         | 3   | B        | 1         | 66,833           | 39,627499        | 35,12986          | 0,419994          | 63,814953        | 59,04             | -0,39            | 53,83            | 1                |                  | 18,798           | 9,27             | 13,074886        | 5,218           | 0,365              | 7,8075202     | 28,126824        | 64,065656        | 1,059854925                  |
| 38         | 3   | B        | 2         | 67,051           | 38,5825          | 28,974628         | 0,334991          | 60,049671        | 59,89             | -0,34            | 58,16            |                  |                  | 19,396           | 9,29             | 13,094886        | 5,471           | 0,3875             | 8,1594607     | 28,927234        | 62,913305        | 0,868245966                  |
| 38         | 3   | B        | 3         | 68,262           | 39,057499        | 28,674374         | 0,344982          | 52,563515        | 65,59             | -2,26            | 56,28            |                  | 1                | 18,245           | 9,36             | 12,585559        | 5,357           | 0,3875             | 7,8477044     | 26,727901        | 65,424394        | 0,883267001                  |
| 38         | 3   | B        | 4         | 62,952           | 38,072498        | 36,030624         | 0,407486          | 60,049667        | 67,28             | -3,19            | 54,39            |                  |                  | 16,786           | 9,38             | 12,605559        | 5,79            | 0,415              | 9,1974838     | 26,66476         | 64,137756        | 1,070289635                  |
| 38         | 3   | B        | 5         | 62,992           | 37,852501        | 42,786369         | 0,414989          | 60,049667        | 66,3              | -4,26            | 50,34            |                  | 1                | 16,349           | 9,38             | 13,251543        | 5,932           | 0,425              | 9,4170688     | 25,954089        | 64,628842        | 1,096331785                  |
| 38         | 3   | B        | 6         | 64,59            | 37,634998        | 34,52935          | 0,409985          | 45,037258        | 64,13             | 0,7              | 56,09            | 1                |                  | 18,133           | 9,42             | 13,293543        | 5,838           | 0,4158333          | 9,0385509     | 28,074005        | 62,887444        | 1,089371653                  |
| 38         | 3   | B        | 7         | 66,516           | 39,112503        | 34,229095         | 0,36499           | 56,301926        | 59,51             | -1,07            | 55,42            |                  |                  | 17,862           | 9,4              | 12,487834        | 5,89            | 0,3941667          | 8,8550123     | 26,853689        | 64,291298        | 0,933179858                  |
| 38         | 3   | B        | 8         | 65,671           | 37,962502        | 36,180752         | 0,384987          | 60,055389        | 65,32             | -0,02            | 57,55            |                  | 1                | 17,302           | 9,44             | 12,529834        | 5,639           | 0,4008333          | 8,586743      | 26,346485        | 65,066772        | 1,014124412                  |
| 38         | 3   | B        | 9         | 65,138           | 39,295002        | 37,381775         | 0,372482          | 60,055401        | 61,5              | -1,09            | 58,98            |                  | 1                | 18,043           | 9,36             | 12,52733         | 5,875           | 0,3983333          | 9,0193128     | 27,699653        | 63,281034        | 0,9479119                    |
| 38         | 3   | B        | 10        | 66,368           | 38,900002        | 25,821949         | 0,349998          | 41,295959        | 60,84             | -0,79            | 60,06            |                  |                  | 20,137           | 9,4              | 12,56933         | 5,176           | 0,3941667          | 7,7989392     | 30,34143         | 61,859631        | 0,899737743                  |
| 38         | 3   | B        | 11        | 63,766           | 38,139999        | 46,089176         | 0,429985          | 60,055389        | 65,79             | -4,37            | 52,77            |                  | 1                | 16,854           | 9,39             | 12,627713        | 5,839           | 0,3975             | 9,1569175     | 26,431013        | 64,412069        | 1,127385976                  |
| 38         | 3   | B        | 12        | 65,653           | 39,369999        | 35,279987         | 0,382496          | 56,307301        | 64,33             | -4,54            | 47,9             |                  |                  | 17,752           | 9,45             | 12,687713        | 5,669           | 0,3958333          | 8,634792      | 27,03913         | 64,326078        | 0,971541808                  |
| 38         | 3   | B        | 13        | 65,439           | 38,0075          | 43,537006         | 0,424995          | 56,301926        | 67,88             | -1,02            | 56,98            | 1                |                  | 16,731           | 9,32             | 12,867244        | 5,905           | 0,4366667          | 9,0236709     | 25,567322        | 65,409007        | 1,1181872                    |
| 38         | 3   | B        | 14        | 68,453           | 38,84            | 31,076414         | 0,362492          | 56,301926        | 61,81             | -2,16            | 55,66            |                  |                  | 20,009           | 9,36             | 12,909244        | 5,434           | 0,3775             | 7,9382934     | 29,230275        | 62,831432        | 0,933295572                  |
| 38         | 3   | B        | 15        | 65,349           | 39,780003        | 40,534454         | 0,419994          | 63,7967          | 64,77             | -4,24            | 44,65            |                  |                  | 18,656           | 9,45             |                  | 5,88            | 0,4175             | 8,9978424     | 28,548256        | 62,453901        | 1,055791776                  |

Supplementary Table S1. Raw data of egg quality parameters with ATOL (Animal Trait Ontology for Livestock) descriptors, for hen.

| Hen<br>age | Pen | Genotype | Replicate | ATOL_<br>0001880   | ATOL_<br>0002297      | ATOL_<br>0002119       | ATOL_<br>0002126        | ATOL_<br>0002122         | ATOL_<br>0002074        | ATOL_<br>0002073      | ATOL_<br>0002075     | ATOL_<br>0005600           | ATOL_<br>0005600       | ATOL_<br>0001883    | ATOL_<br>0005587   | ATOL_<br>0001938         | ATOL_<br>1881        | ATOL_<br>0002121         | ATOL_<br>1881    | ATOL_<br>0001883 | ATOL_<br>0001882   | ATOL_<br>0002125                  |
|------------|-----|----------|-----------|--------------------|-----------------------|------------------------|-------------------------|--------------------------|-------------------------|-----------------------|----------------------|----------------------------|------------------------|---------------------|--------------------|--------------------------|----------------------|--------------------------|------------------|------------------|--------------------|-----------------------------------|
|            |     |          |           | Egg<br>weight<br>g | Egg<br>diameter<br>mm | Shell<br>strength<br>N | Shell<br>fracture<br>mm | Shell<br>modulus<br>N/mm | Yolk<br>lightness<br>L* | Yolk<br>redness<br>a* | Yolk<br>yellow<br>b* | Blood<br>spot<br>1=present | Meat spot<br>1=present | Yolk<br>weight<br>g | Albumen<br>pH<br>- | Albumen<br>DM<br>% (w/w) | Shell<br>weight<br>g | Shell<br>thickness<br>mm | Shell<br>% (w/w) | Yolk<br>% (w/w)  | Albumen<br>% (w/w) | Shell-to-egg-<br>compression<br>% |
| 38         | 4   | A        | 1         | 59,41              | 38,112499             | 41,585346              | 0,409992                | 56,296562                | 65,71                   | -1,79                 | 55,86                |                            |                        | 16,663              | 9,47               | 13,654596                | 5,44                 | 0,4025                   | 9,1567076        | 28,047467        | 62,795826          | 1,075741583                       |
| 38         | 4   | A        | 2         | 63,283             | 37,9025               | 42,936497              | 0,389996                | 60,043949                | 64,96                   | -0,54                 | 61,53                |                            |                        | 17,518              | 9,49               | 13,674596                | 6,534                | 0,4916667                | 10,325048        | 27,682           | 61,992952          | 1,02894532                        |
| 38         | 4   | A        | 3         | 64,182             | 37,767502             | 33,478458              | 0,359997                | 60,049671                | 65,46                   | 3,65                  | 60,6                 |                            |                        | 17,709              | 9,42               | 14,049533                | 5,648                | 0,4075                   | 8,7999751        | 27,591848        | 63,608177          | 0,953192509                       |
| 38         | 4   | A        | 4         | 62,912             | 37,640003             | 45,488667              | 0,394993                | 60,061134                | 67,22                   | -1,33                 | 56,32                |                            |                        | 17,702              | 9,43               | 13,029638                | 6,505                | 0,4525                   | 10,33984         | 28,137716        | 61,522444          | 1,049396835                       |
| 38         | 4   | A        | 5         | 58,053             | 35,93                 | 32,877945              | 0,389999                | 75,047775                | 63,33                   | -1,16                 | 56,34                |                            |                        | 16,02               | 9,47               | 13,071638                | 5,598                | 0,4158333                | 9,6429125        | 27,595473        | 62,761614          | 1,085441136                       |
| 38         | 4   | A        | 6         | 59,641             | 37,8475               | 41,134964              | 0,389996                | 63,808861                | 62,73                   | -1,5                  | 57,79                |                            |                        | 17,438              | 9,47               | 13,26835                 | 5,562                | 0,4308333                | 9,3257994        | 29,238276        | 61,435925          | 1,030440584                       |
| 38         | 4   | A        | 7         | 63,376             | 37,2775               | 40,834709              | 0,41                    | 52,538445                | 68,7                    | -1,3                  | 57,78                |                            |                        | 17,537              | 9,51               | 13,31035                 | 6,382                | 0,4466667                | 10,070058        | 27,671358        | 62,258584          | 1,099859164                       |
| 38         | 4   | A        | 8         | 66,137             | 39,919998             | 41,585346              | 0,364994                | 82,576172                | 65,47                   | -0,37                 | 55,41                |                            |                        | 17,83               | 9,41               | 14,070743                | 6,605                | 0,455                    | 9,9868455        | 26,959191        | 63,053964          | 0,914313673                       |
| 38         | 4   | A        | 9         | 62,334             | 37,9725               | 43,837261              | 0,369987                | 71,315781                | 61,73                   | 1,02                  | 60,72                |                            |                        | 17,501              | 9,45               | 13,417045                | 6,597                | 0,4725                   | 10,583309        | 28,07617         | 61,34052           | 0,974355125                       |
| 38         | 4   | A        | 10        | 60,281             | 37,385002             | 34,078968              | 0,379997                | 52,543461                | 67,92                   | 0,96                  | 60,34                |                            |                        | 18,058              | 9,49               | 13,459045                | 5,822                | 0,405                    | 9,6581012        | 29,956371        | 60,385528          | 1,016442369                       |
| 38         | 4   | A        | 11        | 57,974             | 37,877502             | 46,839813              | 0,422489                | 71,302177                | 64,48                   | -0,7                  | 58,01                |                            |                        | 16,855              | 9,44               | 13,572798                | 5,577                | 0,4266667                | 9,6198296        | 29,073378        | 61,306793          | 1,115408825                       |
| 38         | 4   | A        | 12        | 57,509             | 37,18                 | 49,842365              | 0,442497                | 48,79966                 | 61,62                   | -3,75                 | 54,03                |                            |                        | 17,357              | 9,5                | 13,632798                | 5,51                 | 0,4333333                | 9,581109         | 30,181363        | 60,237528          | 1,190147929                       |
| 38         | 4   | A        | 13        | 65,163             | 39,697498             |                        |                         |                          | 55,14                   | -1,57                 | 47,81                |                            |                        | 16,25               | 9,42               | 14,652615                | 5,949                | 0,4216667                | 9,1294139        | 24,937465        | 65,933122          |                                   |
| 38         | 4   | A        | 14        | 67,235             | 39,715                | 41,435219              | 0,389996                | 67,555878                | 66,02                   | 1,13                  | 60,37                | 1                          |                        | 16,48               | 9,38               | 14,007533                | 5,726                | 0,4058333                | 8,5163977        | 24,511043        | 66,972559          | 0,981986655                       |
| 38         | 4   | A        | 15        | 60,319             | 37,577499             | 56,147724              | 0,464985                | 60,055397                | 62,83                   | -0,89                 | 52,4                 |                            |                        | 15,572              | 9,42               |                          | 6,167                | 0,4475                   | 10,223976        | 25,816078        | 63,959946          | 1,237402734                       |
| 38         | 5   | B        | 1         | 58,081             | 37,552502             | 35,580242              | 0,392494                | 52,54847                 | 64,84                   | -2,68                 | 49,72                | 1                          |                        | 17,193              | 9,34               | 13,685937                | 5,282                | 0,4166667                | 9,094196         | 29,601763        | 61,304041          | 1,045187349                       |
| 38         | 5   | B        | 2         | 65,837             | 38,272503             | 21,768503              | 0,324986                | 41,292023                | 64,44                   | 0,4                   | 55,76                |                            |                        | 17,052              | 9,36               | 13,705937                | 4,71                 | 0,3633333                | 7,1540319        | 25,90033         | 66,945638          | 0,849137042                       |
| 38         | 5   | B        | 3         | 57,999             | 37,52                 | 26,722713              | 0,319996                | 56,307301                | 66,54                   | -2,76                 | 53,6                 |                            |                        | 16,128              | 9,36               | 13,152279                | 5,21                 | 0,4141667                | 8,9829135        | 27,807376        | 63,209711          | 0,852867804                       |
| 38         | 5   | B        | 4         | 51,748             | 35,670002             | 24,170546              | 0,344994                | 63,802773                | 65,9                    | -3,23                 | 57,95                | 1                          |                        | 14,993              | 9,38               | 13,172279                | 4,395                | 0,3541667                | 8,4930819        | 28,9731          | 62,533818          | 0,967182452                       |
| 38         | 5   | B        | 5         | 60,26              | 37,7075               | 42,18586               | 0,404991                | 60,055401                | 67,22                   | -4,49                 | 50,21                |                            |                        | 16,088              | 9,39               | 13,216692                | 5,876                | 0,4308333                | 9,7510787        | 26,697644        | 63,551278          | 1,074033017                       |
| 38         | 5   | B        | 6         | 65,335             | 38,782501             | 29,274883              | 0,314999                | 71,302177                | 66,16                   | -2,68                 | 46,04                |                            |                        | 18,271              | 9,43               | 13,258692                | 5,282                | 0,3833333                | 8,0844876        | 27,965103        | 63,950409          | 0,812219408                       |
| 38         | 5   | B        | 7         | 61,285             |                       |                        |                         |                          | 64,52                   | -0,64                 | 49,64                |                            |                        | 16,813              | 9,34               | 13,726297                | 4,808                | 0,3633333                | 7,8453129        | 27,434119        | 64,720568          |                                   |
| 38         | 5   | B        | 8         | 68,895             | 40,654999             | 23,870289              | 0,277496                | 90,083092                | 65,88                   | -4,19                 | 49,9                 |                            |                        | 18,365              | 9,38               | 13,768297                | 6,135                | 0,4325                   | 8,9048552        | 26,656506        | 64,438639          | 0,682563047                       |
| 38         | 5   | B        | 9         | 65,313             | 38,695                | 36,631138              | 0,362488                | 56,301926                | 65,73                   | -2,03                 | 52,71                |                            |                        | 17,387              | 9,4                | 13,145667                | 5,668                | 0,3933333                | 8,6782111        | 26,62104         | 64,700749          | 0,93678253                        |
| 38         | 5   | B        | 10        | 69,664             | 40,455002             | 36,180752              | 0,37999                 | 86,33786                 | 64,95                   | 1,64                  | 59,22                |                            |                        | 17,831              | 9,44               | 13,187667                | 6,276                | 0,4158333                | 9,0089573        | 25,595717        | 65,395326          | 0,939290523                       |
| 38         | 5   | B        | 11        | 70,052             | 40,705002             | 35,880497              | 0,392487                | 86,337868                | 66,19                   | -3,83                 | 49,62                | 1                          |                        | 18,94               | 9,32               | 13,004188                | 6,197                | 0,4175                   | 8,8462856        | 27,037058        | 64,116656          | 0,964223021                       |
| 38         | 5   | B        | 12        | 61,904             | 37,8825               | 37,531902              | 0,4175                  | 56,307301                | 62,13                   | -2,46                 | 52,9                 | 1                          |                        | 17,221              | 9,38               | 13,064188                | 5,342                | 0,3975                   | 8,6294908        | 27,818881        | 63,551628          | 1,102091995                       |
| 38         | 5   | B        | 13        | 62,055             | 38,607502             | 28,524246              | 0,342495                | 52,548481                | 67,23                   | 0,87                  | 58,07                |                            |                        | 16,258              | 9,31               | 14,125801                | 4,572                | 0,3608333                | 7,3676577        | 26,199339        | 66,433003          | 0,887120332                       |
| 38         | 5   | B        | 14        | 64,406             | 38,615002             | 33,028072              | 0,384998                | 52,54847                 | 65,8                    | -2,15                 | 55,38                |                            |                        | 17,104              | 9,35               | 14,167801                | 5,62                 | 0,3983333                | 8,7258951        | 26,556532        | 64,717573          | 0,997016652                       |
| 38         | 5   | B        | 15        | 69,036             | 40,700001             | 22,218885              | 0,502502                | 63,808853                | 66,43                   | -2,67                 | 49,72                |                            |                        | 19,241              | 9,43               |                          | 5,417                | 0,375                    | 7,8466307        | 27,870966        | 64,282403          | 1,234648618                       |
| 38         | 6   | C        | 1         | 60,089             | 39,3675               | 44,437771              | 0,414997                | 56,296562                | 59,45                   | -4,25                 | 44,36                | 1                          |                        | 14,908              | 9,29               | 13,499434                | 5,641                | 0,4025                   | 9,3877415        | 24,809865        | 65,802393          | 1,054161428                       |
| 38         | 6   | C        | 2         | 63,037             | 38,705002             | 31,526798              | 0,372486                | 56,296574                | 66,65                   | -3,19                 | 52,77                | 1                          | 1                      | 16,335              | 9,31               | 13,519434                | 5,297                | 0,3758333                | 8,4030014        | 25,913352        | 65,683646          | 0,962371737                       |
| 38         | 6   | C        | 3         | 59,361             | 37,515003             | 40,2342                | 0,470001                | 37,534622                | 59,15                   | -3,8                  | 38,46                |                            |                        | 17,093              | 9,3                | 13,663089                | 5,026                | 0,3758333                | 8,4668385        | 28,795           | 62,738161          | 1,252834766                       |
| 38         | 6   | C        | 4         | 59,545             | 38,1875               | 39,183308              | 0,382496                | 71,315781                | 68,02                   | -3,33                 | 54,01                |                            |                        | 16,166              | 9,32               | 13,683089                | 5,306                | 0,3983333                | 8,9109077        | 27,149215        | 63,939877          | 1,001626187                       |
| 38         | 6   | C        | 5         | 65,985             | 39,32                 | 38,132412              | 0,362492                | 63,821037                | 64,94                   | -0,17                 | 58,89                |                            |                        | 16,54               | 9,36               | 13,312333                | 6,084                | 0,41                     | 9,2202773        | 25,066303        | 65,71342           | 0,92190234                        |
| 38         | 6   | C        | 6         | 64,116             | 38,887501             |                        |                         |                          | 64,05                   | -0,51                 | 55,16                |                            |                        | 16,232              | 9,4                | 13,354333                | 6,046                | 0,405                    | 9,4297835        | 25,316614        | 65,253603          |                                   |
| 38         | 6   | C        | 7         | 57,655             | 38,355                |                        |                         |                          | 64,8                    | -3,2                  | 55,56                |                            |                        | 16,325              | 9,4                | 13,502615                | 4,089                | 0,3241667                | 7,0921863        | 28,314977        | 64,592837          |                                   |
| 38         | 6   | C        | 8         | 63,308             | 37,794998             | 28,374119              | 0,379986                | 48,79501                 | 52,55                   | -2,89                 | 44,76                |                            |                        |                     | 9,44               | 13,544615                | 5,022                | 0,3608333                | 7,9326467        |                  |                    | 1,005387009                       |
| 38         | 6   | C        | 9         | 62,001             | 39,607498             | 34,229095              | 0,359997                | 60,055401                | 66,22                   | -4,71                 | 50,79                |                            |                        | 13,924              | 9,39               | 13,419197                | 5,666                | 0,3983333                | 9,1385623        | 22,457702        | 68,403735          | 0,908911237                       |
| 38         | 6   | C        | 10        | 63,803             | 39,737499             | 42,335987              | 0,397491                | 60,055401                | 64,71                   | -0,86                 | 53,02                |                            |                        | 17,974              | 9,43               | 13,461197                | 5,751                | 0,415                    | 9,0136827        | 28,171089        | 62,815228          | 1,000291941                       |
| 38         | 6   | C        | 11        | 61,793             | 37,752502             | 30,626032              | 0,347488                | 56,291195                | 59,65                   | -1,43                 | 54,14                |                            |                        | 17,736              | 9,43               | 13,236332                | 5,403                | 0,3933333                | 8,7437088        | 28,70228         | 62,554011          | 0,920437008                       |
| 38         | 6   | C        | 12        | 55,568             | 36,870003             | 40,684582              | 0,394993                | 60,049667                | 63,18                   | -1,42                 | 58,62                |                            | 1                      | 16,378              | 9,49               | 13,296332                | 5,199                | 0,3866667                | 9,3561042        | 29,473798        | 61,170098          | 1,071312633                       |
| 38         | 6   | C        | 13        | 64,199             | 39,022499             | 35,880497              | 0,407497                | 60,055397                | 61,41                   | 2,12                  | 56,09                | 1                          |                        | 17,07               | 9,41               | 13,611061                | 5,274                | 0,3733333                | 8,2150812        | 26,589199        | 65,19572           | 1,044261671                       |
| 38         | 6   | C        | 14        | 61,644             | 38,017502             | 25,671822              | 0,374992                | 30,030567                | 65,38                   | -2,95                 | 52,38                |                            | 1                      | 18,551              | 9,45               | 13,653061                | 5,111                | 0,3641667                | 8,2911557        | 30,093764        | 61,61508           | 0,986366753                       |
| 38         | 6   | C        | 15        | 57,417             | 37,365005             | 44,137516              | 0,442486                | 60,061119                | 57,86                   | -1,31                 | 56,45                |                            |                        | 16,807              | 9,44               |                          | 5,321                | 0,4016667                | 9,2672902        | 29,271818        | 61,460891          | 1,184225721                       |

Supplementary Table S1. Raw data of egg quality parameters with ATOL (Animal Trait Ontology for Livestock) descriptors, for hen.

| Hen<br>age | Pen | Genotype | Replicate | ATOL_<br>0001880 | ATOL_<br>0002297 | ATOL_<br>0002119  | ATOL_<br>0002126  | ATOL_<br>0002122 | ATOL_<br>0002074  | ATOL_<br>0002073 | ATOL_<br>0002075 | ATOL_<br>0005600 | ATOL_<br>0005600 | ATOL_<br>0001883 | ATOL_<br>0005587 | ATOL_<br>0001938 | ATOL_<br>1881   | ATOL_<br>0002121   | ATOL_<br>1881 | ATOL_<br>0001883 | ATOL_<br>0001882 | ATOL_<br>0002125             |
|------------|-----|----------|-----------|------------------|------------------|-------------------|-------------------|------------------|-------------------|------------------|------------------|------------------|------------------|------------------|------------------|------------------|-----------------|--------------------|---------------|------------------|------------------|------------------------------|
|            |     |          |           | Egg<br>weight    | Egg<br>diameter  | Shell<br>strength | Shell<br>fracture | Shell<br>modulus | Yolk<br>lightness | Yolk<br>redness  | Yolk<br>yellow   | Blood<br>spot    | Meat spot        | Yolk<br>weight   | Albumen<br>pH    | Albumen<br>DM    | Shell<br>weight | Shell<br>thickness | Shell         | Yolk             | Albumen          | Shell-to-egg-<br>compression |
|            |     |          |           | g                | mm               | N                 | mm                | N/mm             | L*                | a*               | b*               | 1=present        | 1=present        | g                | -                | % (w/w)          | g               | mm                 | % (w/w)       | % (w/w)          | % (w/w)          | %                            |
| 38         | 7   | A        | 1         | 59,545           | 37,702499        | 48,491219         | 0,409985          | 67,575211        | 66,03             | 0,55             | 59,53            |                  |                  | 14,93            | 9,45             | 13,997516        | 6,1             | 0,4333333          | 10,244353     | 25,073474        | 64,682173        | 1,087421287                  |
| 38         | 7   | A        | 2         | 61,684           | 37,8475          | 35,12986          | 0,349998          | 63,802773        | 58,03             | 0,7              | 53,69            |                  | 1                | 19,501           | 9,47             | 14,017516        | 5,745           | 0,3658333          | 9,3135983     | 31,614357        | 59,072045        | 0,924758571                  |
| 38         | 7   | A        | 3         | 63,36            | 39,357498        | 46,239304         | 0,417496          | 56,296574        | 67,83             | -2,37            | 55,74            |                  |                  | 18,363           | 9,35             | 13,906743        | 5,474           | 0,4125             | 8,6395202     | 28,982008        | 62,378472        | 1,060778813                  |
| 38         | 7   | A        | 4         | 62,711           | 38,467499        | 33,778713         | 0,414997          | 60,055401        | 63,19             | -2,46            | 55,89            |                  |                  | 18,215           | 9,37             | 13,926743        | 5,188           | 0,3825             | 8,2728708     | 29,045941        | 62,681188        | 1,07882501                   |
| 38         | 7   | A        | 5         | 60,742           | 37,482498        | 43,386879         | 0,404984          | 56,307301        | 64,04             | 1,33             | 56,6             |                  |                  | 17,734           | 9,42             | 13,74176         | 6,021           | 0,4483333          | 9,9124164     | 29,195614        | 60,891969        | 1,080461606                  |
| 38         | 7   | A        | 6         | 61,524           | 37,654999        | 43,837261         | 0,397488          | 63,814953        | 59,72             | -0,78            | 52,97            |                  |                  | 16,695           | 9,46             | 13,78376         | 6,906           | 0,4358333          | 11,224888     | 27,135752        | 61,63936         | 1,055604861                  |
| 38         | 7   | A        | 7         | 64,579           | 38,189999        | 32,427563         | 0,332493          | 52,54847         | 65,23             | -1,5             | 59               |                  |                  | 18,455           | 9,37             | 13,096871        | 6,012           | 0,4166667          | 9,3095279     | 28,577401        | 62,113071        | 0,87062846                   |
| 38         | 7   | A        | 8         | 63,022           | 38,077499        | 43,987389         | 0,369987          | 75,069244        | 63,29             | 2,22             | 54,5             |                  | 1                | 18,384           | 9,41             | 13,138871        | 6,09            | 0,4441667          | 9,6632922     | 29,170766        | 61,165942        | 0,971668334                  |
| 38         | 7   | A        | 9         | 66,266           | 38,759998        | 33,628586         | 0,382484          | 52,54847         | 68,79             | -0,87            | 61,73            |                  |                  | 19,544           | 9,28             | 13,078257        | 5,193           | 0,3875             | 7,836598      | 29,493254        | 62,670148        | 0,986800877                  |
| 38         | 7   | A        | 10        | 61,318           | 37,247501        | 45,038284         | 0,432484          | 52,558491        | 61,26             | 1,45             | 53,21            |                  |                  | 17,437           | 9,32             | 13,120257        | 5,987           | 0,4441667          | 9,763854      | 28,437001        | 61,799145        | 1,161108768                  |
| 38         | 7   | A        | 11        | 61,535           | 38,080002        | 57,19862          | 0,4375            | 75,069244        | 59,59             | 1,6              | 67,75            |                  |                  | 16,242           | 9,35             | 13,229669        | 6,088           | 0,4358333          | 9,8935565     | 26,394735        | 63,711709        | 1,148896998                  |
| 38         | 7   | A        | 12        | 64,318           | 38,360001        | 40,534454         | 0,402489          | 60,049671        | 66,54             | -2,18            | 58,35            |                  |                  | 18,823           | 9,41             | 13,289669        | 6,085           | 0,4116667          | 9,4608041     | 29,265524        | 61,273671        | 1,04924137                   |
| 38         | 7   | A        | 13        | 54,508           | 36,125           | 42,936497         | 0,449993          | 86,337875        | 56,49             | 5,92             | 66,45            |                  |                  | 15,832           | 9,32             | 13,53886         | 5,005           | 0,3816667          | 9,1821384     | 29,045278        | 61,772584        | 1,245655363                  |
| 38         | 7   | A        | 14        | 63,842           | 38,5825          | 41,735474         | 0,36499           | 63,814938        | 68,2              | -2,04            | 58,33            |                  |                  | 17,132           | 9,36             | 13,58086         | 6,068           | 0,43               | 9,5047148     | 26,834999        | 63,660286        | 0,945998834                  |
| 38         | 7   | A        | 15        | 63,385           | 37,877499        | 38,432667         | 0,352497          | 63,814945        | 60,73             | 1,22             | 62,05            |                  |                  | 18,576           | 9,36             |                  | 6,184           | 0,4525             | 9,7562515     | 29,306618        | 60,93713         | 0,930623746                  |
| 38         | 8   | D        | 1         | 59,174           | 38,095001        | 44,137516         | 0,347485          | 82,576172        | 61,09             | -0,42            | 60,07            |                  |                  | 15,692           | 9,39             | 13,110932        | 5,798           | 0,4375             | 9,7982222     | 26,518403        | 63,683374        | 0,912153802                  |
| 38         | 8   | D        | 2         | 65,082           | 39,645           | 53,2953           | 0,434982          | 60,049671        | 69,6              | 0,13             | 61,92            |                  |                  | 17,195           | 9,41             | 13,130932        | 6,262           | 0,4391667          | 9,621708      | 26,420516        | 63,957776        | 1,097192584                  |
| 38         | 8   | D        | 3         | 66,855           | 39,540001        | 46,539558         | 0,419994          | 60,061134        | 65,36             | -4,12            | 53,81            |                  |                  | 16,852           | 9,32             | 13,642656        | 6,064           | 0,415              | 9,0703762     | 25,206791        | 65,722833        | 1,062200277                  |
| 38         | 8   | D        | 4         | 56,56            | 37,727501        | 41,585346         | 0,364998          | 75,076408        | 70,09             | -3,77            | 49,18            |                  |                  | 16,947           | 9,34             | 13,662656        | 5,297           | 0,4058333          | 9,3652758     | 29,962871        | 60,671853        | 0,967458725                  |
| 38         | 8   | D        | 5         | 65,054           | 39,200001        | 37,832157         | 0,349983          | 60,061119        | 63,93             | -3,05            | 51,64            |                  |                  | 17,198           | 9,38             | 13,242889        | 6,106           | 0,4158333          | 9,3860485     | 26,436499        | 64,177453        | 0,892813753                  |
| 38         | 8   | D        | 6         | 56,807           | 37,560001        | 45,939049         | 0,42749           | 71,308975        | 65,05             | -2,87            | 54,99            |                  |                  | 14,498           | 9,42             | 13,284889        | 5,583           | 0,42               | 9,8280142     | 25,521503        | 64,650483        | 1,138152259                  |
| 38         | 8   | D        | 7         | 58,976           | 38,067501        | 41,735474         | 0,399994          | 67,568764        | 66,43             | -0,97            | 57,79            |                  |                  | 14,36            | 9,35             | 13,718021        | 5,435           | 0,3975             | 9,2156131     | 24,348888        | 66,435499        | 1,050749299                  |
| 38         | 8   | D        | 8         | 63,279           | 38,0275          | 49,391983         | 0,394985          | 71,315781        | 66,18             | -1,93            | 55,91            |                  |                  | 17,622           | 9,39             | 13,760021        | 6,491           | 0,46               | 10,2577747    | 27,848101        | 61,894151        | 1,038682532                  |
| 38         | 8   | D        | 9         | 63,758           | 39,265003        | 58,549767         | 0,379993          | 97,580711        | 53,13             | 1,28             | 52               |                  |                  | 17,405           | 9,34             | 13,431188        | 6,713           | 0,4625             | 10,528875     | 27,298535        | 62,17259         | 0,967765111                  |
| 38         | 8   | D        | 10        | 60,43            | 38,215           | 45,338539         | 0,379997          | 63,802773        | 62,64             | -0,04            | 49,75            |                  |                  | 14,94            | 9,38             | 13,473188        | 5,702           | 0,4516667          | 9,4357107     | 24,72282         | 65,841469        | 0,994366087                  |
| 38         | 8   | D        | 11        | 60,527           | 38,352501        | 38,132412         | 0,359993          | 71,322594        | 58,52             | -0,25            | 58,49            |                  |                  | 16,298           | 9,36             | 13,157991        | 5,757           | 0,43               | 9,5114577     | 26,926826        | 63,561716        | 0,938642828                  |
| 38         | 8   | D        | 12        | 58,47            | 38,0975          | 47,290195         | 0,362499          | 78,822708        | 63,04             | -4,65            | 47,79            |                  |                  | 18,196           | 9,42             | 13,217991        | 5,82            | 0,4291667          | 9,9538225     | 31,120233        | 58,925945        | 0,951503379                  |
| 38         | 8   | D        | 13        | 55,045           | 37,287498        | 45,188412         | 0,417496          | 56,301926        | 65,33             | -3,95            | 50,26            |                  |                  | 16,309           | 9,32             | 12,687205        | 5,46            | 0,4425             | 9,9191571     | 29,628486        | 60,452357        | 1,119667509                  |
| 38         | 8   | D        | 14        | 60,601           | 37,294998        | 43,086624         | 0,412487          | 60,049667        | 64,29             | -0,28            | 51,53            |                  |                  | 13,508           | 9,36             | 12,729205        | 6,079           | 0,4416667          | 10,031188     | 22,290061        | 67,678751        | 1,106011589                  |
| 38         | 8   | D        | 15        | 56,539           | 37,564999        | 53,145172         | 0,419991          | 67,575211        | 65,46             | -2,8             | 53,5             |                  |                  | 14,916           | 9,41             |                  | 5,775           | 0,4466667          | 10,214188     | 26,38179         | 63,404022        | 1,118038097                  |
| 38         | 9   | D        | 1         | 61,334           | 37,947502        | 44,137516         | 0,37999           | 78,830231        | 63,11             | 1,09             | 54,5             |                  |                  | 14,306           | 9,26             | 12,353636        | 5,922           | 0,4291667          | 9,6553298     | 23,324746        | 67,019924        | 1,001357085                  |
| 38         | 9   | D        | 2         | 63,953           | 38,852501        | 28,974628         | 0,264992          | 67,562325        | 62,46             | -3,17            | 53,76            |                  |                  | 16,637           | 9,28             | 12,373636        | 6,383           | 0,455              | 9,9807671     | 26,014417        | 64,004816        | 0,682046183                  |
| 38         | 9   | D        | 3         | 59,738           | 38,422501        | 36,48101          | 0,380001          | 56,296562        | 67,78             | -2,38            | 50,18            |                  |                  | 15,059           | 9,25             | 14,213386        | 4,975           | 0,38               | 8,3280324     | 25,20841         | 66,463558        | 0,989006416                  |
| 38         | 9   | D        | 4         | 61,279           | 39,407501        | 39,483562         | 0,367493          | 63,7967          | 48,62             | 4,53             | 47,87            |                  |                  | 13,782           | 9,27             | 14,233386        | 5,457           | 0,4041667          | 8,9051714     | 22,490576        | 68,604253        | 0,932545812                  |
| 38         | 9   | D        | 5         | 60,962           | 38,66            |                   |                   |                  | 58,1              | -1,95            | 53,72            |                  |                  | 14,732           | 9,32             | 14,710544        | 5,1             | 0,3766667          | 8,3658673     | 24,165874        | 67,468259        |                              |
| 38         | 9   | D        | 6         | 58,154           | 38,047501        | 45,038284         | 0,357494          | 86,313164        | 67,41             | 1,81             | 58,16            |                  |                  | 13,958           | 9,36             | 14,752544        | 5,396           | 0,4116667          | 9,2788114     | 24,001788        | 66,7194          | 0,939599161                  |
| 38         | 9   | D        | 7         | 59,328           | 38,037498        | 42,18586          | 0,389988          | 67,568764        | 68                | -1,8             | 56,39            |                  |                  | 15,933           | 9,27             | 13,314783        | 5,61            | 0,4316667          | 9,4559061     | 26,855785        | 63,688309        | 1,025272482                  |
| 38         | 9   | D        | 8         | 60,72            | 38,3825          | 46,239304         | 0,404987          | 67,568764        | 64,38             | -2,03            | 48,94            |                  |                  | 15,688           | 9,31             | 13,356783        | 5,542           | 0,415              | 9,127141      | 25,836627        | 65,036232        | 1,055134501                  |
| 38         | 9   | D        | 9         | 65,019           | 39,425003        | 52,244408         | 0,432487          | 56,301926        | 63,6              | -1,42            | 60,77            |                  |                  | 15,226           | 9,36             | 13,435917        | 6,406           | 0,445              | 9,8525047     | 23,41777         | 66,729725        | 1,0969866                    |
| 38         | 9   | D        | 10        | 65,535           | 38,857502        | 41,585346         | 0,357491          | 67,555885        | 68,17             | -2,08            | 56,07            |                  |                  | 15,412           | 9,4              | 13,477917        | 6,428           | 0,4466667          | 9,8084993     | 23,517205        | 66,674296        | 0,9200051                    |
| 38         | 9   | D        | 11        | 58,119           | 37,755001        |                   | 0,44249           | 71,30899         | 66,36             | -2,38            | 52,25            |                  |                  | 15,651           | 9,36             | 12,542799        | 5,78            | 0,4316667          | 9,9451126     | 26,929231        | 63,125656        | 1,172003677                  |
| 38         | 9   | D        | 12        | 60,557           | 37,737503        | 45,488667         | 0,374985          | 82,576164        | 65,68             | -1,31            | 56,63            |                  |                  | 17,23            | 9,42             | 12,602799        | 5,93            | 0,4375             | 9,792427      | 28,452532        | 61,755041        | 0,993666698                  |
| 38         | 9   | D        | 13        | 65,552           | 38,990002        | 46,839813         | 0,367489          | 78,815193        | 66,21             | -2,04            | 50,19            |                  | 1                | 15,847           | 9,13             | 12,943286        | 6,494           | 0,45               | 9,906639      | 24,174701        | 65,91866         | 0,942521111                  |
| 38         | 9   | D        | 14        | 55,634           | 38,690002        |                   |                   |                  | 61,74             | -1,15            | 55,38            |                  |                  | 16,094           | 9,17             | 12,985286        | 3,179           | 0,27               | 5,7141316     | 28,928353        | 65,357515        |                              |
| 38         | 9   | D        | 15        | 65,539           | 40,305           | 49,391983         | 0,4375            | 105,10697        | 60,89             | 3,94             | 60,21            |                  |                  | 16,295           | 9,21             |                  | 6,94            | 0,4466667          | 10,589115     | 24,863059        | 64,547826        | 1,085473266                  |

Supplementary Table S1. Raw data of egg quality parameters with ATOL (Animal Trait Ontology for Livestock) descriptors, for hen.

| Hen age | Pen | Genotype | Replicate | ATOL_0001880 | ATOL_0002297 | ATOL_0002119   | ATOL_0002126   | ATOL_0002122  | ATOL_0002074   | ATOL_0002073 | ATOL_0002075 | ATOL_0005600 | ATOL_0005600 | ATOL_0001883 | ATOL_0005587 | ATOL_0001938 | 1881         | ATOL_0002121    | 1881      | ATOL_0001883 | ATOL_0001882 | ATOL_0002125             |
|---------|-----|----------|-----------|--------------|--------------|----------------|----------------|---------------|----------------|--------------|--------------|--------------|--------------|--------------|--------------|--------------|--------------|-----------------|-----------|--------------|--------------|--------------------------|
|         |     |          |           | Egg weight   | Egg diameter | Shell strength | Shell fracture | Shell modulus | Yolk lightness | Yolk redness | Yolk yellow  | Blood spot   | Meat spot    | Yolk weight  | Albumen pH   | Albumen DM   | Shell weight | Shell thickness | Shell     | Yolk         | Albumen      | Shell-to-egg-compression |
| wk      | no. |          |           | g            | mm           | N              | mm             | N/mm          | L*             | a*           | b*           | 1=present    | 1=present    | g            | -            | % (w/w)      | g            | mm              | % (w/w)   | % (w/w)      | % (w/w)      | %                        |
| 38      | 11  | C        | 1         | 66,986       | 39,919998    | 37,08152       | 0,377499       | 78,807678     | 68,06          | -2,15        | 51,94        |              |              | 16,06        | 9,35         | 14,250122    | 5,584        | 0,4033333       | 8,3360702 | 23,975159    | 67,688771    | 0,945638825              |
| 38      | 11  | C        | 2         | 64,485       | 37,352501    | 35,73037       | 0,349998       | 67,542992     | 62,31          | -2,24        | 54,92        |              |              | 18,392       | 9,37         | 14,270122    | 6,213        | 0,4291667       | 9,6347988 | 28,521362    | 61,84384     | 0,937013562              |
| 38      | 11  | C        | 3         | 61,642       | 38,7925      | 45,488667      | 0,397484       | 60,049667     | 66,56          | -3,88        | 49,1         |              | 1            | 15,969       | 9,38         | 12,729097    | 5,499        | 0,405           | 8,9208656 | 25,906038    | 65,173096    | 1,024641361              |
| 38      | 11  | C        | 4         | 64,767       | 39,192501    | 40,834709      | 0,429989       | 48,790356     | 67,77          | -1,37        | 60,99        |              |              | 18,063       | 9,4          | 12,749097    | 5,357        | 0,3833333       | 8,2711875 | 27,889203    | 63,83961     | 1,097120595              |
| 38      | 11  | C        | 5         | 62,761       | 39,137501    | 41,585346      | 0,359997       | 71,315781     | 59,81          | 0,59         | 57,34        |              | 1            | 16,268       | 9,38         | 13,853539    | 5,973        | 0,4291667       | 9,5170568 | 25,920556    | 64,562387    | 0,91982623               |
| 38      | 11  | C        | 6         | 60,743       | 38,477501    | 41,735474      | 0,332489       | 71,308975     | 66,41          | 0,89         | 58,69        |              |              | 17,617       | 9,42         | 13,895539    | 5,887        | 0,4366667       | 9,6916517 | 29,002519    | 61,305829    | 0,864112771              |
| 38      | 11  | C        | 7         | 62,48        | 37,82        | 34,829605      | 0,357498       | 67,562325     | 61,22          | -4,71        | 42,22        |              |              | 17,976       | 9,42         | 12,282665    | 5,723        | 0,4016667       | 9,1597311 | 28,770807    | 62,069462    | 0,945261766              |
| 38      | 11  | C        | 8         | 65,935       | 38,2575      | 27,173098      | 0,302494       | 71,308983     | 67             | -3,51        | 54,2         |              |              | 17,018       | 9,46         | 12,324665    | 6,013        | 0,4066667       | 9,1195875 | 25,810268    | 65,070145    | 0,790678952              |
| 38      | 11  | C        | 9         | 62,696       | 38,77        | 36,631138      | 0,36499        | 67,555885     | 62,88          | -0,62        | 57,02        |              |              | 17,662       | 9,41         | 12,026858    | 5,481        | 0,3833333       | 8,7421845 | 28,170856    | 63,086959    | 0,941423781              |
| 38      | 11  | C        | 10        | 66,538       | 37,9925      | 25,671822      | 0,299992       | 60,061111     | 64,71          | -3,73        | 50,56        |              |              | 16,961       | 9,45         | 12,068858    | 6,038        | 0,4008333       | 9,0745138 | 25,490697    | 65,434789    | 0,789608475              |
| 38      | 11  | C        | 11        | 60,972       | 37,622501    | 37,68203       | 0,372498       | 56,285831     | 63,65          | 1,08         | 56,83        |              |              | 17,196       | 9,29         | 12,746413    | 5,877        | 0,445           | 9,6388506 | 28,20311     | 62,15804     | 0,990093668              |
| 38      | 11  | C        | 12        | 60,578       | 38,029999    | 33,778713      | 0,324993       | 78,807678     | 60,7           | 3,14         | 54,59        |              |              | 15,722       | 9,35         | 12,806413    | 5,233        | 0,3783333       | 8,6384496 | 25,953316    | 65,408234    | 0,854570099              |
| 38      | 11  | C        | 13        | 62,825       | 37,5975      | 34,229095      | 0,380001       | 60,049671     | 67,82          | -5,13        | 51,7         |              |              | 18,482       | 9,4          | 13,181147    | 5,669        | 0,3966667       | 9,0234779 | 29,418225    | 61,558297    | 1,010708159              |
| 38      | 11  | C        | 14        | 62,228       | 39,717499    | 37,832157      | 0,407486       | 67,549431     | 64,74          | -4,16        | 41,01        |              |              | 18,013       | 9,44         | 13,223147    | 5,177        | 0,375           | 8,3194061 | 28,946776    | 62,733818    | 1,025960874              |
| 38      | 11  | C        | 15        | 65,372       | 39,052502    | 33,928841      | 0,359997       | 60,055397     | 66,38          | -3,45        | 51,62        |              |              | 17,133       | 9,45         |              | 5,569        | 0,3858333       | 8,5189378 | 26,208468    | 65,272594    | 0,921828261              |
| 38      | 12  | B        | 1         | 64,683       | 38,595001    |                |                | 63,05         | -0,24          | 54,85        |              | 1            |              | 17,009       | 9,43         | 12,791932    | 5,991        | 0,4166667       | 9,2620936 | 26,295936    | 64,441971    |                          |
| 38      | 12  | B        | 2         | 62,455       | 38,810001    | 43,837261      | 0,384995       | 75,069244     | 66,73          | -1,55        | 57,69        |              | 1            | 16,16        | 9,45         | 12,811932    | 5,788        | 0,4141667       | 9,2674726 | 25,87463     | 64,857898    | 0,991999459              |
| 38      | 12  | B        | 3         | 65,489       | 38,150002    | 34,078968      | 0,347496       | 67,555885     | 61,8           | -0,11        | 56,94        |              | 1            | 16,817       | 9,43         | 13,109195    | 5,877        | 0,4158333       | 8,9740262 | 25,679122    | 65,346852    | 0,91086758               |
| 38      | 12  | B        | 4         | 61,886       | 38,092503    | 33,478458      | 0,319996       | 75,062088     | 67,74          | -0,53        | 56,6         |              | 1            | 16,673       | 9,45         | 13,129195    | 5,483        | 0,3933333       | 8,8598391 | 26,941473    | 64,198688    | 0,840049812              |
| 38      | 12  | B        | 5         | 66,852       | 39,794998    | 31,97718       | 0,394989       | 67,562325     | 64,87          | -0,3         | 57,97        |              | 1            | 18,274       | 9,4          | 13,583186    | 5,274        | 0,3716667       | 7,8890684 | 27,335009    | 64,775923    | 0,992559417              |
| 38      | 12  | B        | 6         | 62,746       | 37,422501    | 34,52935       | 0,404991       | 48,79501      | 65,17          | -2,56        | 53,47        |              | 1            | 19,194       | 9,44         | 13,625186    | 5,553        | 0,4025          | 8,8499665 | 30,589998    | 60,560036    | 1,082212544              |
| 38      | 12  | B        | 7         | 63,228       | 37,215       | 31,376671      | 0,39249        | 48,790356     | 57,16          | -1           | 63,12        |              |              | 19,271       | 9,41         | 12,59224     | 5,528        | 0,385           | 8,742962  | 30,478585    | 60,778453    | 1,054655381              |
| 38      | 12  | B        | 8         | 67,154       | 39,137501    | 30,926287      | 0,322498       | 67,562325     | 66,1           | -3,26        | 54,9         |              |              | 17,704       | 9,45         | 12,63424     | 5,819        | 0,4191667       | 8,6651577 | 26,363284    | 64,971558    | 0,824012754              |
| 38      | 12  | B        | 9         | 64,279       | 37,775002    | 25,972076      | 0,372486       | 52,54847      | 62,82          | 1            | 55,9         |              | 1            | 15,751       | 9,26         | 12,7344      | 4,555        | 0,355           | 7,0862957 | 24,504115    | 68,409589    | 0,986064806              |
| 38      | 12  | B        | 10        | 66,921       | 39,625       | 27,473352      | 0,357494       | 56,301926     | 64,84          | -0,08        | 58,06        |              |              | 17,713       | 9,3          | 12,7764      | 5,162        | 0,3616667       | 7,7135727 | 26,468523    | 65,817905    | 0,90219306               |
| 38      | 12  | B        | 11        | 67,634       | 38,294998    | 37,68203       | 0,367485       | 56,307308     |                |              |              |              | 1            | 16,257       | 9,42         | 12,613678    | 6,136        | 0,4266667       | 9,0723601 | 24,036727    | 66,890913    | 0,959616188              |
| 38      | 12  | B        | 12        | 58,051       | 37,912498    | 45,488667      | 0,397491       | 71,322586     | 55,74          | -1,77        | 40,02        |              |              | 16,201       | 9,48         | 12,673678    | 5,539        | 0,4166667       | 9,54161   | 27,908219    | 62,550171    | 1,048443181              |
| 38      | 12  | B        | 13        | 64,455       | 38,877499    | 22,969524      | 0,324997       | 52,543457     | 67,07          | -2,18        | 54,77        |              | 1            | 17,355       | 9,4          | 13,143629    | 5,026        | 0,3791667       | 7,7976883 | 26,925762    | 65,27655     | 0,835951407              |
| 38      | 12  | B        | 14        | 62,962       | 38,700001    | 33,328327      | 0,334995       | 71,315781     | 64,91          | -0,22        | 58,52        |              |              | 16,881       | 9,44         | 13,185629    | 5,444        | 0,3866667       | 8,6464852 | 26,81141     | 64,542105    | 0,865620133              |
| 38      | 12  | B        | 15        | 63,331       | 38,5975      | 24,921183      | 0,317482       | 56,291195     | 66,29          | -0,01        | 60,79        |              |              | 17,746       | 9,42         |              | 4,954        | 0,3716667       | 7,8223935 | 28,021032    | 64,156574    | 0,822545502              |
| 46      | 1   | C        | 1         | 62,828       | 44,404999    | 51,039112      | 0,439991       | 71,322586     | 48,99          | 1,9          | 46,08        |              |              | 17,467       | 9,29         | 12,579132    | 6,196        | 0,435           | 9,861845  | 27,801299    | 62,336856    | 0,99085916               |
| 46      | 1   | C        | 2         | 68,112       | 45,109997    | 36,927116      | 0,379993       | 56,301926     | 57,44          | -3,03        | 40,34        |              |              | 18,316       | 9,31         | 12,599132    | 6,122        | 0,4091667       | 8,9881372 | 26,891003    | 64,12086     | 0,842369819              |
| 46      | 1   | C        | 3         | 64,427       | 44,34        | 40,680305      | 0,437496       | 52,553486     | 49,96          | -1,34        | 54,64        |              |              | 17,537       | 9,35         | 13,058783    | 5,416        | 0,4             | 8,4064135 | 27,219954    | 64,373632    | 0,986684709              |
| 46      | 1   | C        | 4         | 67,984       | 46,260002    | 20,413078      | 0,247498       | 97,580704     | 65,47          | -3,04        | 55,66        |              |              | 17,665       | 9,37         | 13,078783    | 5,795        | 0,415           | 8,5240645 | 25,984055    | 65,49188     | 0,535015109              |
| 46      | 1   | C        | 5         | 66,665       | 46,125       | 44,883881      | 0,394993       | 108,8504      | 65,26          | -4,63        | 44,07        |              |              | 16,835       | 9,19         | 12,350134    | 6,422        | 0,4358333       | 9,6332408 | 25,253131    | 65,113628    | 0,856353388              |
| 46      | 1   | C        | 6         | 61,29        | 43,164997    | 45,784645      | 0,377483       | 97,580711     | 58,52          | -2,56        | 54,71        |              |              | 16,231       | 9,23         | 12,392134    | 6,084        | 0,4266667       | 9,9265786 | 26,482297    | 63,591124    | 0,874511818              |
| 46      | 1   | C        | 7         | 67,397       | 44,259998    | 41,58107       | 0,392494       | 60,038509     | 62,41          | -3,54        | 49,01        |              | 1            | 16,539       | 9,41         | 12,83092     | 6,677        | 0,4483333       | 9,9069692 | 24,539668    | 65,553363    | 0,886791726              |
| 46      | 1   | C        | 8         | 66,346       | 44,947498    | 44,883881      | 0,409985       | 60,055401     | 56,54          | -3,08        | 52,16        |              | 1            | 17,955       | 9,45         | 12,87292     | 5,986        | 0,4166667       | 9,0223977 | 27,062671    | 63,914931    | 0,912141984              |
| 46      | 1   | C        | 9         | 67,664       | 44,904999    | 49,237579      | 0,392498       | 71,322586     | 60,32          | -2,2         | 55,25        |              |              | 19,482       | 9,37         | 12,475417    | 6,732        | 0,4375          | 9,9491606 | 28,792268    | 61,258572    | 0,874063041              |
| 46      | 1   | C        | 10        | 65,854       | 44,682499    | 57,494598      | 0,404984       | 90,083092     | 57,85          | -4,64        | 45,81        |              |              | 16,775       | 9,41         | 12,517417    | 7,22         | 0,4875          | 10,963647 | 25,473016    | 63,563337    | 0,906359333              |
| 46      | 1   | C        | 11        | 69,148       | 45,989998    | 39,479286      | 0,379986       | 112,59315     | 64,74          | -2,87        | 50,7         |              |              | 17,859       | 9,24         | 13,211447    | 5,793        | 0,3841667       | 8,3776827 | 25,827211    | 65,795106    | 0,826236174              |
| 46      | 1   | C        | 12        | 64,632       | 44,995003    | 43,682858      | 0,402489       | 75,076408     | 60,2           | -0,41        | 51,98        |              |              | 16,281       | 9,3          | 13,271447    | 5,896        | 0,415           | 9,1224161 | 25,190308    | 65,687276    | 0,894519331              |
| 46      | 1   | C        | 13        | 62,771       | 43,947498    | 43,682858      | 0,397495       | 56,290943     | 63,13          | -1,01        | 56,03        |              |              | 17,098       | 9,39         | 13,442489    | 6,042        | 0,4241667       | 9,625464  | 27,238693    | 63,135843    | 0,904476974              |
| 46      | 1   | C        | 14        | 67,204       | 45,674999    | 44,583622      | 0,392494       | 105,08691     | 64,43          | -3,09        | 50,51        |              |              | 19,262       | 9,43         | 13,484489    | 6,471        | 0,4433333       | 9,6288911 | 28,661984    | 61,709124    | 0,859319121              |
| 46      | 1   | C        | 15        | 64,308       | 44,342499    | 43,983112      | 0,389999       | 75,072304     | 63,3           | -3,38        | 51,35        |              |              | 15,725       | 9,34         |              | 6,354        | 0,4175          | 9,8805747 | 24,452634    | 65,666791    | 0,879515158              |



Supplementary Table S1. Raw data of egg quality parameters with ATOL (Animal Trait Ontology for Livestock) descriptors, for hen.

| Hen<br>age | Pen | Genotype | Replicate | ATOL_<br>0001880 | ATOL_<br>0002297 | ATOL_<br>0002119  | ATOL_<br>0002126  | ATOL_<br>0002122 | ATOL_<br>0002074  | ATOL_<br>0002073 | ATOL_<br>0002075 | ATOL_<br>0005600 | ATOL_<br>0005600 | ATOL_<br>0001883 | ATOL_<br>0005587 | ATOL_<br>0001938 | ATOL_<br>1881   | ATOL_<br>0002121   | ATOL_<br>1881 | ATOL_<br>0001883 | ATOL_<br>0001882 | ATOL_<br>0002125             |
|------------|-----|----------|-----------|------------------|------------------|-------------------|-------------------|------------------|-------------------|------------------|------------------|------------------|------------------|------------------|------------------|------------------|-----------------|--------------------|---------------|------------------|------------------|------------------------------|
|            |     |          |           | Egg<br>weight    | Egg<br>diameter  | Shell<br>strength | Shell<br>fracture | Shell<br>modulus | Yolk<br>lightness | Yolk<br>redness  | Yolk<br>yellow   | Blood<br>spot    | Meat spot        | Yolk<br>weight   | Albumen<br>pH    | Albumen<br>DM    | Shell<br>weight | Shell<br>thickness | Shell         | Yolk             | Albumen          | Shell-to-egg-<br>compression |
|            |     |          |           | g                | mm               | N                 | mm                | N/mm             | L*                | a*               | b*               | 1=present        | 1=present        | g                | -                | % (w/w)          | g               | mm                 | % (w/w)       | % (w/w)          | % (w/w)          | %                            |
| 46         | 2   | D        | 1         | 65,392           | 44,509998        | 48,486942         | 0,424992          | 71,315781        | 61,23             | -1,94            | 52,8             |                  |                  | 17,416           | 9,33             | 12,894751        | 6,15            | 0,4225             | 9,4048202     | 26,633227        | 63,961953        | 0,954823678                  |
| 46         | 2   | D        | 2         | 66,072           | 44,732498        | 57,494598         | 0,449997          | 75,069244        | 62,72             | -2,66            | 49,97            |                  |                  | 18,647           | 9,35             | 12,914751        | 6,447           | 0,4375             | 9,7575372     | 28,222242        | 62,02022         | 1,005973331                  |
| 46         | 2   | D        | 3         | 60,559           | 43,977497        | 53,891537         | 0,439995          | 71,329391        | 60,84             | -4,17            | 50,56            |                  |                  | 17,179           | 9,3              | 12,613646        | 5,969           | 0,4433333          | 9,8565036     | 28,367377        | 61,776119        | 1,000500324                  |
| 46         | 2   | D        | 4         | 62,1232          | 44,424999        | 54,792301         | 0,424992          | 67,568764        | 57,89             | -0,88            | 54,4             |                  |                  | 16,823           | 9,32             | 12,633646        | 6,424           | 0,445              | 10,340742     | 27,08006         | 62,579197        | 0,956650556                  |
| 46         | 2   | D        | 5         | 60,785           | 43,619999        | 43,983112         | 0,394989          | 78,817093        | 55,97             | 0,15             | 52,44            |                  |                  | 19,025           | 9,26             | 12,713289        | 5,016           | 0,425              | 8,2520359     | 31,29884         | 60,449124        | 0,905522717                  |
| 46         | 2   | D        | 6         | 63,42            | 45,055004        | 47,285919         | 0,409988          | 67,562317        | 66,89             | -4,18            | 48,7             |                  |                  | 16,987           | 9,3              | 12,755289        | 5,704           | 0,4216667          | 8,9940082     | 26,784926        | 64,221066        | 0,909972175                  |
| 46         | 2   | D        | 7         | 61,7             | 43,719997        | 54,792301         | 0,404984          | 86,321396        | 65,14             | -0,11            | 52,57            |                  |                  | 16,54            | 9,34             | 12,571776        | 6,682           | 0,4591667          | 10,829822     | 26,807131        | 62,363047        | 0,926312964                  |
| 46         | 2   | D        | 8         | 60,449           | 43,712498        | 47,285919         | 0,389992          | 78,815186        | 63,11             | -1,71            | 52,95            | 1                |                  | 18,007           | 9,38             | 12,613776        | 5,979           | 0,42               | 9,8909825     | 29,788748        | 60,32027         | 0,892175048                  |
| 46         | 2   | D        | 9         | 60,938           | 44,384998        | 51,789749         | 0,414989          | 63,802765        | 63,48             | -1,69            | 53,66            |                  |                  | 18,66            | 9,31             | 12,314025        | 5,821           | 0,4158333          | 9,5523319     | 30,621287        | 59,826381        | 0,934975822                  |
| 46         | 2   | D        | 10        | 61,178           | 43,549999        | 49,838089         | 0,397495          | 86,321404        | 66,84             | -1,74            | 57,87            |                  |                  | 16,933           | 9,35             | 12,356025        | 5,807           | 0,4141667          | 9,4919742     | 27,67825         | 62,829775        | 0,912732512                  |
| 46         | 2   | D        | 11        | 63,995           | 44,355           | 42,782093         | 0,334991          | 71,308983        | 62,62             | -1,66            | 50,73            |                  |                  | 18,201           | 9,37             | 10,530345        | 6,197           | 0,4408333          | 9,683569      | 28,441284        | 61,875146        | 0,75524969                   |
| 46         | 2   | D        | 12        | 66,743           | 46,079998        | 54,341919         | 0,467487          | 112,6146         | 64,02             | -3,11            | 48,69            |                  |                  | 16,999           | 9,43             | 10,590345        | 6,189           | 0,4383333          | 9,2728825     | 25,469338        | 65,25778         | 1,014511763                  |
| 46         | 2   | D        | 13        | 61,83            | 43,294998        | 45,634518         | 0,369991          | 86,329628        | 61,35             | -0,38            | 56,16            |                  |                  | 17,141           | 9,39             | 12,802529        | 5,923           | 0,4275             | 9,5794922     | 27,722788        | 62,69772         | 0,8545814                    |
| 46         | 2   | D        | 14        | 64,196           | 44,155003        | 52,690514         | 0,407482          | 86,329628        | 64,77             | -2,64            | 51,38            |                  |                  | 18,857           | 9,43             | 12,844529        | 6,438           | 0,4508333          | 10,028662     | 29,374104        | 60,597233        | 0,922844462                  |
| 46         | 2   | D        | 15        | 60,955           | 44,68            | 34,975456         | 0,377499          | 63,808853        | 59,42             | -1,04            | 49,25            |                  |                  | 17,064           | 9,31             |                  | 5,075           | 0,3641667          | 8,3258141     | 27,994422        | 63,679764        | 0,844894808                  |
| 46         | 3   | B        | 1         | 64,128           | 44,037498        | 48,03656          | 0,364986          | 75,054939        | 58,65             | -3,05            | 53,1             |                  | 1                | 18,115           | 9,25             | 13,216601        | 6,462           | 0,4525             | 10,076722     | 28,248191        | 61,675087        | 0,828807304                  |
| 46         | 3   | B        | 2         | 62,84            | 43,775002        | 43,082348         | 0,404995          | 75,050827        | 65,99             | -4,1             | 51,11            |                  | 1                | 15,765           | 9,27             | 13,236601        | 5,726           | 0,4033333          | 9,1120306     | 25,087524        | 65,800446        | 0,925174144                  |
| 46         | 3   | B        | 3         | 62,304           | 43,314999        | 39,479286         | 0,462486          | 60,021442        | 52,39             | 1,35             | 57,21            |                  |                  | 18,706           | 9,18             | 12,457532        | 5,513           | 0,3983333          | 8,848549      | 30,023754        | 61,127696        | 1,06772714                   |
| 46         | 3   | B        | 4         | 68,45            | 44,497498        | 41,280815         | 0,364986          | 71,315781        | 65,01             | -2,78            | 51,46            |                  |                  | 18,211           | 9,2              | 12,477532        | 6,352           | 0,4258333          | 9,2797663     | 26,604821        | 64,115413        | 0,820239376                  |
| 46         | 3   | B        | 5         | 68,636           | 44,707497        | 37,077244         | 0,429985          | 52,543461        | 66,88             | -2,32            | 50,3             | 1                | 1                | 18,533           | 9,35             | 12,965381        | 6,121           | 0,42               | 8,9180605     | 27,001865        | 64,080075        | 0,961773816                  |
| 46         | 3   | B        | 6         | 68,232           | 44,067497        | 33,0238           | 0,419983          | 56,262291        | 63,49             | -4,75            | 48,48            | 1                |                  | 18,529           | 9,39             | 13,007381        | 6,479           | 0,4341667          | 9,4955446     | 27,15588         | 63,348575        | 0,953044826                  |
| 46         | 3   | B        | 7         | 67,437           | 44,7925          | 47,135792         | 0,472496          | 52,538452        | 63,72             | -1,39            | 57,38            | 1                |                  | 18,147           | 9,34             | 12,890025        | 5,755           | 0,4241667          | 8,5338909     | 26,90956         | 64,556549        | 1,054855165                  |
| 46         | 3   | B        | 8         | 67,529           | 45,5425          | 35,425838         | 0,43499           | 75,054924        | 65,77             | -6,01            | 50,66            | 1                |                  | 19,253           | 9,38             | 12,932025        | 5,412           | 0,3891667          | 8,0143346     | 28,510714        | 63,474952        | 0,955129824                  |
| 46         | 3   | B        | 9         | 61,741           | 43,572498        | 41,130688         | 0,422493          | 67,568764        | 66,51             | -3,6             | 51,84            | 1                |                  | 17,79            | 9,29             | 12,585959        | 7,225           | 0,4908333          | 11,70211      | 28,813916        | 59,483973        | 0,969632267                  |
| 46         | 3   | B        | 10        | 64,497           | 44,482502        | 31,672649         | 0,457493          | 67,49881         | 67,24             | -6,2             | 44,73            |                  | 1                | 19,109           | 9,33             | 12,627959        | 4,981           | 0,3658333          | 7,7228398     | 29,627735        | 62,649426        | 1,028478569                  |
| 46         | 3   | B        | 11        | 68,746           | 45,032497        | 48,186687         | 0,459988          | 86,281593        | 58,09             | -1,12            | 52,81            |                  |                  | 17,533           | 9,29             | 12,713764        | 6,561           | 0,44               | 9,543828      | 25,504029        | 64,952143        | 1,021457904                  |
| 46         | 3   | B        | 12        | 68,034           | 45,889999        | 31,372395         | 0,314987          | 112,59263        | 66,09             | -2,18            | 53,4             |                  |                  | 20,029           | 9,35             | 12,773764        | 6,09            | 0,4058333          | 8,9514066     | 29,439692        | 61,608901        | 0,686395744                  |
| 46         | 3   | B        | 13        | 62,537           | 44,192497        | 46,835537         | 0,444992          | 52,543461        | 52,64             | 1,73             | 64,62            | 1                |                  | 18,471           | 9,29             | 13,256826        | 5,893           | 0,4233333          | 9,4232215     | 29,536115        | 61,040664        | 1,00694016                   |
| 46         | 3   | B        | 14        | 67,476           | 44,174999        | 30,92201          | 0,377487          | 60,032784        | 66,41             | -4,59            | 49,66            |                  | 1                | 17,691           | 9,33             | 13,298826        | 5,36            | 0,38               | 7,9435651     | 26,218211        | 65,838224        | 0,854526335                  |
| 46         | 3   | B        | 15        | 61,51            | 43,877499        | 42,782093         | 0,414993          | 60,049767        | 64,54             | -3,26            | 51,37            |                  | 1                | 15,991           | 9,35             |                  | 5,73            | 0,4191667          | 9,3155584     | 25,997399        | 64,687043        | 0,945799121                  |
| 46         | 4   | A        | 1         | 64,692           | 43,752499        | 55,843193         | 0,469994          | 71,30899         | 63,62             | -1,23            | 52               |                  |                  | 20,141           | 9,36             | 13,241757        | 6,654           | 0,45               | 10,285661     | 31,13368         | 58,580659        | 1,074210641                  |
| 46         | 4   | A        | 2         | 62,786           | 43,364998        | 42,93222          | 0,434986          | 71,265144        | 54,81             | -1,4             | 54,72            |                  | 1                | 17,56            | 9,38             | 13,261757        | 6,05            | 0,4175             | 9,6359061     | 27,968018        | 62,396076        | 1,003080872                  |
| 46         | 4   | A        | 3         | 65,442           | 44,114998        | 43,232475         | 0,415001          | 56,27969         | 66,41             | -1,37            | 57,6             |                  |                  | 19,983           | 9,36             | 13,852506        | 6,237           | 0,4308333          | 9,5305767     | 30,535436        | 59,933987        | 0,94072542                   |
| 46         | 4   | A        | 4         | 67,338           | 44,285           | 40,680305         | 0,442497          | 56,285057        | 64,89             | -1,8             | 55,39            |                  |                  | 20,805           | 9,38             | 13,872506        | 5,765           | 0,3891667          | 8,5612878     | 30,896374        | 60,542339        | 0,99920289                   |
| 46         | 4   | A        | 5         | 62,007           | 43,93            | 43,382603         | 0,412502          | 52,54847         | 58,01             | 0,17             | 57,78            |                  |                  | 18,949           | 9,41             | 13,218142        | 5,715           | 0,4033333          | 9,2167013     | 30,559453        | 60,223846        | 0,938998407                  |
| 46         | 4   | A        | 6         | 65,47            | 44,294998        | 44,883881         | 0,384995          | 60,043945        | 59,2              | -0,98            | 56,87            |                  |                  | 19,444           | 9,45             | 13,260142        | 6,437           | 0,4333333          | 9,8319841     | 29,699099        | 60,468917        | 0,869161344                  |
| 46         | 4   | A        | 7         | 64,733           | 44,407497        | 46,385155         | 0,465             | 67,557518        | 61,52             | -2,57            | 50,73            |                  |                  | 18,617           | 9,42             | 12,350907        | 6,033           | 0,425              | 9,3198214     | 28,759674        | 61,920504        | 1,04712049                   |
| 46         | 4   | A        | 8         | 66,702           | 45,350002        | 53,44138          | 0,467499          | 101,34347        |                   |                  |                  |                  |                  | 16,903           | 9,35             | 13,245592        | 6,443           | 0,4475             | 9,6593805     | 25,341069        | 64,99955         | 1,030868753                  |
| 46         | 4   | A        | 9         | 65,048           | 44,93            | 55,693291         | 0,474995          | 60,049667        | 60,39             | -0,66            | 53,09            |                  |                  | 16,735           | 9,26             |                  | 6,34            | 0,4358333          | 9,7466486     | 25,727155        | 64,526196        | 1,057188961                  |
| 46         | 4   | A        | 10        | 64,281           | 44,442501        | 45,034233         | 0,377499          | 71,308983        | 62,23             | -0,23            | 53,66            |                  |                  | 19,095           | 9,39             | 13,494819        | 6,94            | 0,4433333          | 10,796347     | 29,705512        | 59,498141        | 0,849409893                  |
| 46         | 4   | A        | 11        | 62,799           | 42,969997        | 43,832985         | 0,434982          | 71,315781        | 63,86             | -1,56            | 51,81            |                  |                  | 17,54            | 9,53             | 12,858838        | 6,387           | 0,44               | 10,170544     | 27,930381        | 61,899075        | 1,012292368                  |
| 46         | 4   | A        | 12        | 65,421           | 44,497501        | 53,741409         | 0,404999          | 71,308975        | 66,39             | -1,78            | 56,13            |                  |                  | 19,925           | 9,56             | 12,737868        | 6,568           | 0,4483333          | 10,03959      | 30,456581        | 59,503829        | 0,910161225                  |
| 46         | 4   | A        | 13        | 64,637           | 44,099998        | 54,642174         | 0,445             | 67,534187        | 56,76             | -0,54            | 62,29            |                  |                  | 19,766           | 9,34             | 13,174147        | 6,766           | 0,46               | 10,467689     | 30,580008        | 58,952303        | 1,009070341                  |
| 46         | 4   | A        | 14        | 68,837           | 45,07            | 50,588726         | 0,467499          | 52,54847         | 57,42             | -0,18            | 61,59            |                  |                  | 19,703           | 9,38             | 13,216147        | 6,457           | 0,4441667          | 9,3801299     | 28,622688        | 61,997182        | 1,037273131                  |
| 46         | 4   | A        | 15        | 65,27            | 43,9725          | 50,138344         | 0,46249           | 52,530975        | 68,41             | -1,44            | 57,95            |                  | 1                | 19,26            | 9,35             |                  | 6,498           | 0,4341667          | 9,9555692     | 29,508197        | 60,536234        | 1,051770993                  |

Supplementary Table S1. Raw data of egg quality parameters with ATOL (Animal Trait Ontology for Livestock) descriptors, for hen.

|            |     |          |           | ATOL_<br>0001880 | ATOL_<br>0002297 | ATOL_<br>0002119  | ATOL_<br>0002126  | ATOL_<br>0002122 | ATOL_<br>0002074  | ATOL_<br>0002073 | ATOL_<br>0002075 | ATOL_<br>0005600 | ATOL_<br>0005600 | ATOL_<br>0001883 | ATOL_<br>0005587 | ATOL_<br>0001938 | 1881            | ATOL_<br>0002121   | 1881      | ATOL_<br>0001883 | ATOL_<br>0001882 | ATOL_<br>0002125             |
|------------|-----|----------|-----------|------------------|------------------|-------------------|-------------------|------------------|-------------------|------------------|------------------|------------------|------------------|------------------|------------------|------------------|-----------------|--------------------|-----------|------------------|------------------|------------------------------|
| Hen<br>age | Pen | Genotype | Replicate | Egg<br>weight    | Egg<br>diameter  | Shell<br>strength | Shell<br>fracture | Shell<br>modulus | Yolk<br>lightness | Yolk<br>redness  | Yolk<br>yellow   | Blood<br>spot    | Meat spot        | Yolk<br>weight   | Albumen<br>pH    | Albumen<br>DM    | Shell<br>weight | Shell<br>thickness | Shell     | Yolk             | Albumen          | Shell-to-egg-<br>compression |
| wk         | no. |          |           | g                | mm               | N                 | mm                | N/mm             | L*                | a*               | b*               | 1=present        | 1=present        | g                | -                | % (w/w)          | g               | mm                 | % (w/w)   | % (w/w)          | % (w/w)          | %                            |
| 46         | 5   | B        | 1         | 67,778           | 44,907497        | 40,079796         | 0,369995          | 75,054924        | 64,85             | -2,13            | 55,55            | 1                |                  | 17,346           | 9,29             | 13,023478        | 6,268           | 0,4216667          | 9,2478385 | 25,592375        | 65,159786        | 0,823904748                  |
| 46         | 5   | B        | 2         | 63,254           | 44,502502        | 41,58107          | 0,444988          | 56,301941        | 56,04             | -1,95            | 37,19            |                  |                  | 19,766           | 9,31             | 13,043478        | 5,524           | 0,4008333          | 8,7330446 | 31,248617        | 60,018339        | 0,999916814                  |
| 46         | 5   | B        | 3         | 69,731           | 45,785           | 38,878773         | 0,39999           | 101,33382        | 54,42             | -0,09            | 49,54            |                  |                  | 16,212           | 9,38             | 12,29137         | 6,454           | 0,4141667          | 9,2555678 | 23,249344        | 67,495088        | 0,873626734                  |
| 46         | 5   | B        | 4         | 66,314           | 44,449997        | 42,93222          | 0,347485          | 82,584045        | 64,43             | -0,97            | 59,86            |                  |                  | 18,719           | 9,4              | 12,31137         | 6,401           | 0,425              | 9,6525621 | 28,227825        | 62,119613        | 0,781743585                  |
| 46         | 5   | B        | 5         | 66,738           | 45,157497        | 35,125584         | 0,372494          | 78,837746        | 51,94             | 1,1              | 46,12            |                  |                  | 17,203           | 9,33             | 12,215679        | 5,747           | 0,3933333          | 8,6112859 | 25,776919        | 65,611795        | 0,824877428                  |
| 46         | 5   | B        | 6         | 63,168           | 43,195           | 47,436047         | 0,447498          | 82,517654        | 60,39             | -4,97            | 53,31            |                  |                  | 17,745           | 9,37             | 12,257679        | 6,684           | 0,4666667          | 10,581307 | 28,091755        | 61,326938        | 1,035994907                  |
| 46         | 5   | B        | 7         | 67,602           | 45,372498        | 44,583622         | 0,457493          | 78,822708        | 57,68             | -2,31            | 56,5             |                  | 1                | 18,265           | 9,37             | 12,657208        | 5,969           | 0,4266667          | 8,8296204 | 27,018431        | 64,151948        | 1,008304634                  |
| 46         | 5   | B        | 8         | 63,947           | 44,129997        | 33,324055         | 0,389992          | 60,038315        | 65,72             | -3,36            | 50,36            | 1                |                  | 18,229           | 9,41             | 12,699208        | 5,065           | 0,365              | 7,9206218 | 28,506419        | 63,572959        | 0,883734481                  |
| 46         | 5   | B        | 9         | 66,548           | 44,649998        | 38,428391         | 0,395             | 75,069244        | 63,51             | -1,56            | 60,66            | 1                |                  | 17,176           | 9,4              | 12,846058        | 5,83            | 0,4075             | 8,7605939 | 25,809942        | 65,429464        | 0,884658494                  |
| 46         | 5   | B        | 10        | 68,591           | 44,454998        | 40,680305         | 0,469986          | 60,032784        | 61,6              | 0,89             | 55,9             |                  |                  | 17,743           | 9,44             | 12,888058        | 6,098           | 0,4033333          | 8,8903792 | 25,867825        | 65,241796        | 1,057217458                  |
| 46         | 5   | B        | 11        | 61,447           | 43,674999        | 30,471628         | 0,344986          | 71,298912        | 49,16             | -0,23            | 48,82            |                  |                  | 16,577           | 9,3              | 12,349907        | 5,208           | 0,3766667          | 8,4755969 | 26,977721        | 64,546683        | 0,78989355                   |
| 46         | 5   | B        | 12        | 68,459           | 44,805           | 40,079796         | 0,402489          | 75,069244        | 64,05             | -3,74            | 51,75            |                  |                  | 18,54            | 9,36             | 12,409907        | 5,961           | 0,3983333          | 8,7074015 | 27,081903        | 64,210695        | 0,898312688                  |
| 46         | 5   | B        | 13        | 62,845           | 44,197498        | 37,978008         | 0,39999           | 56,296574        | 65,54             | -2,28            | 55,68            |                  | 1                | 16,403           | 9,37             | 12,641338        | 5,278           | 0,3841667          | 8,3984406 | 26,100724        | 65,500835        | 0,90500598                   |
| 46         | 5   | B        | 14        | 67,12            | 44,224998        | 39,479286         | 0,407486          | 56,296562        | 66,57             | -5,15            | 46,64            |                  |                  | 18,429           | 9,41             | 12,683338        | 6,205           | 0,4141667          | 9,2446365 | 27,456794        | 63,29857         | 0,921392919                  |
| 46         | 5   | B        | 15        | 62,161           | 43,4025          | 38,428391         | 0,412498          | 63,82103         | 62,98             | -5,05            | 49,49            |                  |                  | 16,765           | 9,43             |                  | 5,705           | 0,3916667          | 9,1777803 | 26,970287        | 63,851933        | 0,950401475                  |
| 46         | 6   | C        | 1         | 59,098           | 43,282497        | 39,479286         | 0,429989          | 75,070778        | 56,36             | -0,68            | 57,4             |                  |                  | 16,461           | 9,38             | 12,828837        | 5,106           | 0,3841667          | 8,6398863 | 27,853734        | 63,506379        | 0,993447767                  |
| 46         | 6   | C        | 2         | 64,233           | 44,7925          | 53,891537         | 0,459995          | 63,827122        | 64,19             | -3,4             | 51,41            | 1                |                  | 17,956           | 9,4              | 12,848837        | 6,051           | 0,425              | 9,4203914 | 27,954478        | 62,62513         | 1,026946475                  |
| 46         | 6   | C        | 3         | 63,872           | 43,894997        | 39,179031         | 0,432487          | 56,285313        | 59,57             | -4,07            | 40,05            |                  |                  | 16,64            | 9,19             | 13,294936        | 5,276           | 0,3675             | 8,2602705 | 26,052104        | 65,687625        | 0,985276295                  |
| 46         | 6   | C        | 4         | 58,952           | 43,889999        | 31,222267         | 0,404991          | 52,532211        | 58,19             | -0,35            | 44,36            |                  |                  | 17,028           | 9,21             | 13,314936        | 4,583           | 0,4033333          | 7,7741213 | 28,884516        | 63,341362        | 0,922740964                  |
| 46         | 6   | C        | 5         | 64,163           | 43,965           | 33,474182         | 0,357502          | 56,274319        | 70,57             | -3,68            | 53,26            |                  | 1                | 17,399           | 9,32             | 13,196158        | 5,677           | 0,3991667          | 8,8477783 | 27,116874        | 64,035347        | 0,81315137                   |
| 46         | 6   | C        | 6         | 58,348           | 43,685001        | 44,733749         | 0,362492          | 78,845276        | 64,13             | -3,32            | 43,31            |                  |                  | 16,796           | 9,36             | 13,238158        | 5,684           | 0,4308333          | 9,7415507 | 28,785905        | 61,472544        | 0,829785949                  |
| 46         | 6   | C        | 7         | 64,115           | 43,855           | 44,283367         | 0,389999          | 78,822708        | 52,62             | -1,73            | 54,98            |                  |                  | 18,424           | 9,3              | 13,559247        | 5,996           | 0,4233333          | 9,3519457 | 28,735865        | 61,912189        | 0,889291985                  |
| 46         | 6   | C        | 8         | 56,672           | 42,115002        | 31,822777         | 0,317486          | 90,071838        | 68,53             | -4,87            | 49,19            |                  |                  | 16,167           | 9,34             | 13,601247        | 5,036           | 0,3933333          | 8,8862225 | 28,527315        | 62,586462        | 0,753854885                  |
| 46         | 6   | C        | 9         | 61,269           | 43,157501        | 43,082348         | 0,404987          | 78,830215        | 62,06             | -1,94            | 48,43            |                  |                  | 16,79            | 9,41             | 13,71791         | 6,043           | 0,4216667          | 9,8630629 | 27,403744        | 62,733193        | 0,938393073                  |
| 46         | 6   | C        | 10        | 63,991           | 44,2775          | 49,838314         | 0,417492          | 75,076416        | 58,44             | -2,21            | 51,47            |                  |                  | 16,633           | 9,45             | 13,75991         | 6,248           | 0,4233333          | 9,763873  | 25,992718        | 64,243409        | 0,942898763                  |
| 46         | 6   | C        | 11        | 56,549           | 42,777508        | 38,128361         | 0,427486          | 78,822708        | 61,28             | -3,8             | 52,56            |                  |                  | 15,751           | 9,41             | 12,473601        | 4,994           | 0,375              | 8,8312791 | 27,85372         | 63,315001        | 0,999324224                  |
| 46         | 6   | C        | 12        | 67,185           | 45,535004        | 44,884106         | 0,394985          | 78,815186        | 62,85             | -4,11            | 51,53            |                  | 1                | 17,966           | 9,47             | 12,533601        | 6,161           | 0,3958333          | 9,1702017 | 26,741088        | 64,08871         | 0,86743157                   |
| 46         | 6   | C        | 13        | 60,726           | 43,657501        | 41,28104          | 0,419998          | 63,798065        | 58,36             | -4,75            | 42,46            |                  |                  | 14,742           | 9,35             | 12,71768         | 5,488           | 0,4166667          | 9,0373152 | 24,276257        | 66,686428        | 0,962029412                  |
| 46         | 6   | C        | 14        | 63,803           | 44,295002        | 45,934998         | 0,409985          | 67,55587         | 58,85             | -2,26            | 48,21            |                  |                  | 16,73            | 9,39             | 12,75968         | 6,161           | 0,4233333          | 9,6562858 | 26,221338        | 64,122377        | 0,925578466                  |
| 46         | 6   | C        | 15        | 56,743           | 42,587505        | 33,174152         | 0,352501          | 82,560425        | 62,54             | -5,54            | 37,63            |                  |                  | 14,14            | 9,25             |                  | 4,92            | 0,4025             | 8,670673  | 24,919373        | 66,409954        | 0,827709912                  |
| 46         | 7   | A        | 1         | 63,592           | 42,695           | 39,179256         | 0,372486          | 86,321396        | 63,09             | -0,87            | 58,76            |                  |                  | 20,376           | 9,27             | 13,142462        | 6,456           | 0,445              | 10,15222  | 32,041766        | 57,806013        | 0,872434711                  |
| 46         | 7   | A        | 2         | 62,957           | 44,215           | 50,288696         | 0,43499           | 63,797592        | 65,84             | -1,25            | 59,43            |                  |                  | 18,867           | 9,29             | 13,162462        | 6,279           | 0,4466667          | 9,973474  | 29,968073        | 60,058453        | 0,983806401                  |
| 46         | 7   | A        | 3         | 72,686           | 46,205002        | 50,138569         | 0,417496          | 112,60385        | 59,7              | -1,71            | 63,36            |                  |                  | 20,081           | 9,37             | 12,608297        | 7,163           | 0,4633333          | 9,8547176 | 27,627053        | 62,518229        | 0,903573167                  |
| 46         | 7   | A        | 4         | 65,665           | 43,9575          | 38,428616         | 0,349983          | 71,290009        | 62,46             | -1,77            | 53,6             |                  |                  | 20,15            | 9,39             | 12,628297        | 6,225           | 0,42               | 9,479936  | 30,686058        | 59,834006        | 0,796184951                  |
| 46         | 7   | A        | 5         | 69,387           | 46,227501        | 38,578743         | 0,439983          | 93,827599        | 66,78             | -2,72            | 53,81            |                  |                  | 19,63            | 9,47             | 13,744542        | 5,683           | 0,3833333          | 8,190295  | 28,290602        | 63,519103        | 0,951777601                  |
| 46         | 7   | A        | 6         | 68,222           | 44,945           | 41,431168         | 0,452496          | 52,553486        | 60,56             | 3,38             | 65,52            | 1                |                  | 20,054           | 9,51             | 13,786542        | 5,913           | 0,4                | 8,6672921 | 29,39521         | 61,937498        | 1,006777172                  |
| 46         | 7   | A        | 7         | 64,937           | 43,82            | 60,347248         | 0,442497          | 63,82103         | 68,75             | -0,62            | 57,9             |                  |                  | 17,444           | 9,34             | 13,538322        | 6,826           | 0,4698333          | 10,511727 | 26,862959        | 62,625314        | 1,009806025                  |
| 46         | 7   | A        | 8         | 67,336           | 45,017502        | 37,077469         | 0,377487          | 63,808861        | 61,16             | -2,96            | 48,24            |                  |                  | 18,894           | 9,38             | 13,580322        | 5,876           | 0,4116667          | 8,7263871 | 28,059285        | 63,214328        | 0,838533866                  |
| 46         | 7   | A        | 9         | 72,906           | 45,950001        | 51,189465         | 0,384995          | 123,86426        | 58,86             | -0,73            | 64,26            |                  |                  | 19,645           | 9,39             | 12,743004        | 7,526           | 0,4716667          | 10,322882 | 26,945656        | 62,731462        | 0,837856347                  |
| 46         | 7   | A        | 10        | 71,056           | 44,250004        | 38,878998         | 0,407486          | 60,043945        | 64,64             | -2,41            | 53,88            |                  |                  | 20,617           | 9,43             | 12,785004        | 6,499           | 0,4416667          | 9,1463071 | 29,015143        | 61,83855         | 0,920872233                  |
| 46         | 7   | A        | 11        | 68,685           | 44,8475          | 38,428616         | 0,437485          | 67,563141        | 65,26             | -1,99            | 55,41            |                  |                  | 18,553           | 9,38             | 13,325408        | 5,946           | 0,4208333          | 8,656912  | 27,01172         | 64,331368        | 0,975494732                  |
| 46         | 7   | A        | 12        | 72,062           | 45,5425          | 54,492271         | 0,419994          | 90,09169         | 63,52             | -2,83            | 51,07            |                  |                  | 19,687           | 9,44             | 13,385408        | 7,831           | 0,4983333          | 10,867031 | 27,31953         | 61,813438        | 0,922202338                  |
| 46         | 7   | A        | 13        | 67,197           | 44,705002        | 50,88921          | 0,470001          | 67,562325        | 63,66             | -2,24            | 55,48            |                  |                  | 19,534           | 9,49             | 12,84545         | 6,419           | 0,4316667          | 9,5525098 | 29,06975         | 61,37774         | 1,051338729                  |
| 46         | 7   | A        | 14        | 62,237           | 43,907505        | 48,637295         | 0,382496          | 71,308975        | 53,19             | 0,91             | 52,05            |                  |                  | 15,132           | 9,27             | 13,679583        | 5,964           | 0,4308333          | 9,5827241 | 24,313511        | 66,103765        | 0,871140367                  |
| 46         | 7   | A        | 15        | 64,568           | 44,110001        | 44,884106         | 0,392494          | 71,275223        | 64,69             | 2,9              | 64,41            |                  |                  | 19,22            | 9,54             |                  | 6,355           | 0,4316667          | 9,8423368 | 29,767067        | 60,390596        | 0,88980728                   |

Supplementary Table S1. Raw data of egg quality parameters with ATOL (Animal Trait Ontology for Livestock) descriptors, for hen.

|            |     |          |           | ATOL_<br>0001880 | ATOL_<br>0002297 | ATOL_<br>0002119  | ATOL_<br>0002126  | ATOL_<br>0002122 | ATOL_<br>0002074  | ATOL_<br>0002073 | ATOL_<br>0002075 | ATOL_<br>0005600 | ATOL_<br>0005600 | ATOL_<br>0001883 | ATOL_<br>0005587 | ATOL_<br>0001938 | ATOL_<br>1881   | ATOL_<br>0002121   | ATOL_<br>1881 | ATOL_<br>0001883 | ATOL_<br>0001882 | ATOL_<br>0002125             |
|------------|-----|----------|-----------|------------------|------------------|-------------------|-------------------|------------------|-------------------|------------------|------------------|------------------|------------------|------------------|------------------|------------------|-----------------|--------------------|---------------|------------------|------------------|------------------------------|
| Hen<br>age | Pen | Genotype | Replicate | Egg<br>weight    | Egg<br>diameter  | Shell<br>strength | Shell<br>fracture | Shell<br>modulus | Yolk<br>lightness | Yolk<br>redness  | Yolk<br>yellow   | Blood<br>spot    | Meat spot        | Yolk<br>weight   | Albumen<br>pH    | Albumen<br>DM    | Shell<br>weight | Shell<br>thickness | Shell         | Yolk             | Albumen          | Shell-to-egg-<br>compression |
| wk         | no. |          |           | g                | mm               | N                 | mm                | N/mm             | L*                | a*               | b*               | 1=present        | 1=present        | g                | -                | % (w/w)          | g               | mm                 | % (w/w)       | % (w/w)          | % (w/w)          | %                            |
| 46         | 8   | D        | 1         | 56,033           | 41,615002        | 40,380276         | 0,417488          | 101,33382        | 64,82             | -3               | 51,86            |                  |                  | 14,726           | 9,36             | 12,455163        | 5,513           | 0,4275             | 9,838845      | 26,280942        | 63,880213        | 1,003215139                  |
| 46         | 8   | D        | 2         | 65,806           | 45,722504        | 50,288696         | 0,417496          | 123,87608        | 59,67             | -2,1             | 56,93            |                  | 1                | 17,026           | 9,38             | 12,475163        | 6,29            | 0,4408333          | 9,5583989     | 25,873021        | 64,56858         | 0,913108346                  |
| 46         | 8   | D        | 3         | 59,768           | 43,827503        | 48,33704          | 0,444996          | 63,803226        | 56,41             | -4,04            | 43,65            |                  |                  | 14,933           | 9,25             | 12,607859        | 6,003           | 0,455              | 10,043836     | 24,984942        | 64,971222        | 1,015335051                  |
| 46         | 8   | D        | 4         | 56,734           | 43,275002        | 59,596611         | 0,46249           | 75,069244        | 62,91             | -2,83            | 47,34            |                  |                  | 15,496           | 9,27             | 12,627859        | 6,029           | 0,4458333          | 10,626785     | 27,313428        | 62,059788        | 1,068723232                  |
| 46         | 8   | D        | 5         | 59,604           | 43,945           | 52,690739         | 0,387497          | 75,062088        | 58,26             | -1,04            | 54,41            |                  |                  | 18,903           | 9,34             | 12,543767        | 6,534           | 0,4425             | 10,962352     | 31,714314        | 57,323334        | 0,881777222                  |
| 46         | 8   | D        | 6         | 67,507           | 44,872501        | 43,983337         | 0,367493          | 75,069252        |                   |                  |                  |                  |                  |                  |                  |                  |                 |                    |               |                  | 0,818971512      |                              |
| 46         | 8   | D        | 7         | 58,403           | 42,995003        | 58,545715         | 0,422493          | 97,590027        | 62,08             | -3,31            | 53,66            |                  |                  | 15,098           | 9,38             | 13,10773         | 6,494           | 0,48               | 11,119292     | 25,851412        | 63,029296        | 0,982656054                  |
| 46         | 8   | D        | 8         | 60,88            | 43,052502        | 50,438824         | 0,449997          | 71,322586        | 63,74             | -2,85            | 52,69            |                  |                  | 17,485           | 9,42             | 13,14973         | 6,294           | 0,4583333          | 10,338371     | 28,720434        | 60,941196        | 1,045228452                  |
| 46         | 8   | D        | 9         | 59,214           | 43,790001        | 48,93755          | 0,402489          | 63,80278         | 60,53             | -1,03            | 52,78            |                  |                  | 16,407           | 9,37             | 13,639086        | 5,956           | 0,4533333          | 10,058432     | 27,707974        | 62,233593        | 0,919134485                  |
| 46         | 8   | D        | 10        | 63,332           | 44,800003        | 41,130913         | 0,397495          | 75,076408        | 61,96             | -3,13            | 52,63            |                  |                  | 16,514           | 9,41             | 13,681086        | 5,54            | 0,4066667          | 8,7475526     | 26,075286        | 65,177162        | 0,887265566                  |
| 46         | 8   | D        | 11        | 59,73            | 43,990002        | 40,230148         | 0,34499           | 71,315781        | 57,91             | -1,59            | 62,78            |                  |                  | 16,62            | 9,41             | 12,657945        | 5,54            | 0,4091667          | 9,2750712     | 27,825213        | 62,899715        | 0,784246384                  |
| 46         | 8   | D        | 12        | 57,426           | 43,0625          | 61,097885         | 0,442486          | 86,321404        | 61,6              | -1,96            | 50,82            |                  |                  | 15,675           | 9,47             | 12,717945        | 6,583           | 0,4833333          | 11,463449     | 27,295998        | 61,240553        | 1,027543687                  |
| 46         | 8   | D        | 13        | 65,03            | 45,43            | 63,95031          | 0,407486          | 112,62537        | 53,98             | -1,5             | 53,26            |                  |                  | 15,845           | 9,4              | 13,971695        | 7,249           | 0,4816667          | 11,147163     | 24,365677        | 64,48716         | 0,896953555                  |
| 46         | 8   | D        | 14        | 63,856           | 44,537502        | 45,634743         | 0,417496          | 63,814945        | 59,52             | -2,53            | 52,7             |                  |                  | 16,19            | 9,44             | 14,013695        | 6,163           | 0,4266667          | 9,6514032     | 25,353921        | 64,994676        | 0,93740327                   |
| 46         | 8   | D        | 15        | 62,784           | 43,932503        | 31,37262          | 0,292503          | 67,555878        | 66,64             | -2,38            | 60,03            |                  | 1                | 15,259           | 9,38             |                  | 6,391           | 0,4433333          | 10,179345     | 24,303963        | 65,516692        | 0,665800899                  |
| 46         | 9   | D        | 1         | 64,433           | 45,052502        | 52,090229         | 0,449986          | 82,586296        | 66,45             | -1,33            | 55,87            |                  |                  | 15,59            | 9,32             | 12,429024        | 6,374           | 0,435              | 9,8924464     | 24,195676        | 65,911877        | 0,998803574                  |
| 46         | 9   | D        | 2         | 62,842           | 44,995003        | 60,197121         | 0,454998          | 67,568764        | 63,71             | -0,65            | 50,95            |                  |                  | 15,118           | 9,34             | 12,449024        | 6,441           | 0,4533333          | 10,249515     | 24,057159        | 65,693326        | 1,011218957                  |
| 46         | 9   | D        | 3         | 58,809           | 42,827499        | 51,789974         | 0,459984          | 75,076408        | 61,29             | -1,87            | 54,24            |                  |                  | 15,161           | 9,32             | 12,462036        | 6,208           | 0,4616667          | 10,556207     | 25,780068        | 63,663725        | 1,074038902                  |
| 46         | 9   | D        | 4         | 61,469           | 43,540001        | 50,438824         | 0,399998          | 93,827606        | 64,04             | -2,27            | 51,62            |                  |                  | 16,873           | 9,34             | 12,482036        | 6,015           | 0,445              | 9,7854203     | 27,449609        | 62,764971        | 0,918690838                  |
| 46         | 9   | D        | 5         | 61,386           | 43,615002        | 48,787422         | 0,384998          | 86,337875        | 59,21             | -3,27            | 52,69            |                  |                  | 16,834           | 9,28             | 12,622993        | 6,226           | 0,445              | 10,142378     | 27,423191        | 62,434431        | 0,882719207                  |
| 46         | 9   | D        | 6         | 62,799           | 44,1875          | 51,940102         | 0,439999          | 56,301926        | 58,69             | -0,22            | 59,39            |                  |                  | 17,446           | 9,32             | 12,664993        | 5,984           | 0,4283333          | 9,5288142     | 27,780697        | 62,690489        | 0,995754455                  |
| 46         | 9   | D        | 7         | 59,533           | 43,7575          | 39,929893         | 0,375             | 67,55587         | 64,93             | -2,11            | 48,64            |                  |                  | 16,282           | 9,21             | 13,241005        | 5,665           | 0,435              | 9,5157308     | 27,349537        | 63,134732        | 0,856995944                  |
| 46         | 9   | D        | 8         | 64,986           | 45,170002        | 48,637295         | 0,43499           | 63,802773        | 58,81             | 0,28             | 48,92            |                  |                  | 15,299           | 9,25             | 13,283005        | 6,253           | 0,4275             | 9,6220724     | 23,541994        | 66,835934        | 0,963006378                  |
| 46         | 9   | D        | 9         | 60,921           | 43,16            | 45,334488         | 0,39999           | 101,33382        | 68,14             | -2,62            | 57,34            |                  | 1                | 17,185           | 9,35             | 12,704031        | 5,672           | 0,4166667          | 9,3104184     | 28,208664        | 62,480918        | 0,92676089                   |
| 46         | 9   | D        | 10        | 64,972           | 44,3325          | 55,693291         | 0,397491          | 86,329628        | 58,57             | 0,51             | 48,75            |                  | 1                | 16,38            | 9,39             | 12,746031        | 6,613           | 0,4483333          | 10,178231     | 25,21086         | 64,610909        | 0,896613094                  |
| 46         | 9   | D        | 11        | 62,122           | 44,5625          | 65,451591         | 0,417492          | 82,57618         | 57,47             | -0,72            | 53,6             |                  |                  | 16,053           | 9,36             | 13,603994        | 6,99            | 0,4941667          | 11,252052     | 25,841087        | 62,906861        | 0,936868443                  |
| 46         | 9   | D        | 12        | 67               | 44,107502        | 53,891762         | 0,414997          | 67,555878        | 64,93             | 1,26             | 55,23            |                  |                  | 13,996           | 9,42             | 13,663994        | 6,668           | 0,4533333          | 9,9522388     | 20,889552        | 69,158209        | 0,940876226                  |
| 46         | 9   | D        | 13        | 60,325           | 43,9175          | 48,487167         | 0,367485          | 75,083572        | 58,97             | -0,67            | 56,7             |                  |                  | 17,771           | 9,38             | 13,229883        | 5,925           | 0,435              | 9,8217986     | 29,458765        | 60,719436        | 0,836762111                  |
| 46         | 9   | D        | 14        | 63,115           | 44,225002        | 48,186913         | 0,409992          | 56,301941        | 63,47             | 0,32             | 57               |                  |                  | 14,509           | 9,42             | 13,271883        | 6,11            | 0,4266667          | 9,6807415     | 22,988196        | 67,331062        | 0,927059314                  |
| 46         | 9   | D        | 15        | 59,934           | 42,709999        | 40,980785         | 0,374985          | 90,074501        | 62,39             | -1,35            | 51,94            |                  |                  | 15,662           | 9,31             |                  | 5,663           | 0,4166667          | 9,4487269     | 26,132079        | 64,419194        | 0,877979416                  |
| 46         | 11  | C        | 1         | 69,808           | 44,705002        | 42,331936         | 0,389992          | 60,049671        | 60,22             | -4,07            | 53,35            |                  |                  | 17,448           | 9,32             | 12,020247        | 6,965           | 0,435              | 9,9773665     | 24,99427         | 65,028364        | 0,872367705                  |
| 46         | 11  | C        | 2         | 63,059           | 44,190002        | 32,423515         | 0,30249           | 82,560417        | 57,92             | -2,81            | 58,63            |                  |                  | 17,315           | 9,34             | 12,040247        | 5,67            | 0,3908333          | 8,9915793     | 27,458412        | 63,550009        | 0,684521354                  |
| 46         | 11  | C        | 3         | 70,348           | 45,237499        | 31,672874         | 0,33749           | 67,55587         | 63,23             | -3,18            | 49,98            |                  |                  | 22,312           | 9,28             | 12,723447        | 6,322           | 0,405              | 8,9867516     | 31,716609        | 59,29664         | 0,746040359                  |
| 46         | 11  | C        | 4         | 65,164           | 44,847504        | 47,136017         | 0,407482          | 75,076416        | 58,33             | -0,57            | 65,6             |                  |                  | 17,524           | 9,3              | 12,743447        | 5,719           | 0,3975             | 8,7763182     | 26,892149        | 64,331533        | 0,908594601                  |
| 46         | 11  | C        | 5         | 62,63            | 43,812504        | 31,072365         | 0,399994          | 52,563511        | 60,35             | -4,49            | 43,33            |                  |                  | 20,427           | 9,33             | 11,686317        | 5,222           | 0,3808333          | 8,3378573     | 32,61536         | 59,046783        | 0,912967677                  |
| 46         | 11  | C        | 6         | 69,237           | 45,540001        | 43,382828         | 0,46249           | 78,830231        | 63,23             | -1,39            | 52,7             |                  | 1                | 18,591           | 9,37             | 11,728317        | 6,033           | 0,4083333          | 8,7135491     | 26,85125         | 64,435201        | 1,015568708                  |
| 46         | 11  | C        | 7         | 61,883           | 43,924999        | 43,2327           | 0,432484          | 60,055397        | 55,96             | -1,3             | 58               |                  |                  |                  |                  |                  |                 |                    |               |                  |                  |                              |

Supplementary Table S1. Raw data of egg quality parameters with ATOL (Animal Trait Ontology for Livestock) descriptors, for hen.

| Hen<br>age | Pen | Genotype | Replicate | ATOL_<br>0001880   | ATOL_<br>0002297      | ATOL_<br>0002119       | ATOL_<br>0002126        | ATOL_<br>0002122         | ATOL_<br>0002074        | ATOL_<br>0002073      | ATOL_<br>0002075     | ATOL_<br>0005600           | ATOL_<br>0005600       | ATOL_<br>0001883    | ATOL_<br>0005587   | ATOL_<br>0001938         | ATOL_<br>1881        | ATOL_<br>0002121         | ATOL_<br>1881    | ATOL_<br>0001883 | ATOL_<br>0001882   | ATOL_<br>0002125                  |
|------------|-----|----------|-----------|--------------------|-----------------------|------------------------|-------------------------|--------------------------|-------------------------|-----------------------|----------------------|----------------------------|------------------------|---------------------|--------------------|--------------------------|----------------------|--------------------------|------------------|------------------|--------------------|-----------------------------------|
|            |     |          |           | Egg<br>weight<br>g | Egg<br>diameter<br>mm | Shell<br>strength<br>N | Shell<br>fracture<br>mm | Shell<br>modulus<br>N/mm | Yolk<br>lightness<br>L* | Yolk<br>redness<br>a* | Yolk<br>yellow<br>b* | Blood<br>spot<br>1=present | Meat spot<br>1=present | Yolk<br>weight<br>g | Albumen<br>pH<br>- | Albumen<br>DM<br>% (w/w) | Shell<br>weight<br>g | Shell<br>thickness<br>mm | Shell<br>% (w/w) | Yolk<br>% (w/w)  | Albumen<br>% (w/w) | Shell-to-egg-<br>compression<br>% |
| 46         | 12  | B        | 1         | 62,559             | 44,07                 | 39,029129              | 0,387493                | 60,055401                | 64,62                   | -1,79                 | 55,08                | 1                          |                        | 18,151              | 9,35               | 12,704179                | 5,933                | 0,4083333                | 9,4838472        | 29,014211        | 61,501942          | 0,879267075                       |
| 46         | 12  | B        | 2         | 60,996             | 42,767502             | 33,624535              | 0,404991                | 71,308975                | 56,73                   | -2,97                 | 53,44                |                            |                        | 19,199              | 9,37               | 12,724179                | 5,178                | 0,3716667                | 8,4890813        | 31,475834        | 60,035084          | 0,94695968                        |
| 46         | 12  | B        | 3         | 67,016             | 44,82                 | 25,217388              | 0,334991                | 60,043945                | 49,58                   | 0,31                  | 51,02                | 1                          |                        |                     | 9,29               | 12,407582                | 5,1335               | 0,3691667                | 7,660111         |                  |                    | 0,747414101                       |
| 46         | 12  | B        | 4         | 65,399             | 44,567501             | 41,431168              | 0,414997                | 60,049667                | 64,45                   | -0,81                 | 48,99                | 1                          |                        | 19,066              | 9,31               | 12,427582                | 5,722                | 0,3991667                | 8,7493693        | 29,153351        | 62,09728           | 0,931165066                       |
| 46         | 12  | B        | 5         | 66,079             | 44,3475               | 39,629639              | 0,387493                | 67,555885                | 60,69                   | -1,03                 | 52,24                | 1                          |                        | 18,697              | 9,36               | 12,713177                | 5,793                | 0,3975                   | 8,7667792        | 28,29492         | 62,938301          | 0,87376515                        |
| 46         | 12  | B        | 6         | 68,92              | 43,802502             | 43,2327                | 0,442486                | 63,803226                | 49,96                   | 4,41                  | 40,17                |                            |                        | 19,931              | 9,4                | 12,755177                | 6,207                | 0,415                    | 9,006094         | 28,919037        | 62,074869          | 1,010184304                       |
| 46         | 12  | B        | 7         | 60,211             | 43,745003             | 38,128361              | 0,437489                | 56,285316                | 62,08                   | 0,98                  | 61,37                |                            |                        | 16,449              | 9,37               | 12,527394                | 4,762                | 0,3533333                | 7,9088539        | 27,318928        | 64,772218          | 1,000089084                       |
| 46         | 12  | B        | 8         | 65,046             | 44,655003             | 37,677979              | 0,384987                | 63,814945                | 62,61                   | -0,91                 | 55,82                |                            |                        | 18,686              | 9,41               | 12,569394                | 5,62                 | 0,3966667                | 8,6400394        | 28,727362        | 62,632598          | 0,862136321                       |
| 46         | 12  | B        | 9         | 66,881             | 44,927502             | 35,125809              | 0,419998                | 60,061134                | 62,23                   | 0,03                  | 55,13                |                            |                        |                     | 9,2                | 12,350615                | 5,311                | 0,3733333                | 7,9409698        |                  |                    | 0,93483497                        |
| 46         | 12  | B        | 10        | 60,842             | 42,607502             | 37,828106              | 0,382484                | 82,584053                | 51,96                   | 1,03                  | 43,98                | 1                          |                        | 16,703              | 9,24               | 12,392615                | 5,753                | 0,425                    | 9,4556392        | 27,453075        | 63,091286          | 0,897691679                       |
| 46         | 12  | B        | 11        | 64,84              | 44,299999             | 15,759348              | 0,234993                | 60,049671                | 58,5                    | -2,46                 | 47,7                 | 1                          |                        | 17,275              | 9,4                | 12,870875                | 5,237                | 0,3725                   | 8,0768044        | 26,642505        | 65,280691          | 0,530458251                       |
| 46         | 12  | B        | 12        | 67,538             | 44,857502             | 34,074917              | 0,364994                | 60,038223                | 59,39                   | -0,03                 | 50,26                |                            |                        | 18,371              | 9,46               | 12,930875                | 6,284                | 0,4166667                | 9,3043916        | 27,200983        | 63,494625          | 0,813674377                       |
| 46         | 12  | B        | 13        | 59,899             | 42,202499             | 36,026573              | 0,397491                | 90,100273                | 51,63                   | -2,04                 | 41,51                |                            |                        |                     | 9,4                | 12,850854                | 5,328                | 0,3875                   | 8,8949732        |                  |                    | 0,941866026                       |
| 46         | 12  | B        | 14        | 65,553             | 44,530003             | 39,479511              | 0,33749                 | 86,313164                | 50,08                   | -0,5                  | 50,86                |                            |                        |                     | 9,44               | 12,892854                | 5,789                | 0,3983333                | 8,8310222        |                  |                    | 0,757893504                       |
| 46         | 12  | B        | 15        | 65,663             | 44,690002             | 37,527851              | 0,359993                | 75,062088                | 67,1                    | -3,96                 | 55,43                |                            |                        | 17,452              | 9,39               |                          | 5,678                | 0,4041667                | 8,6471833        | 26,578134        | 64,774683          | 0,80553364                        |
| 54         | 1   | C        | 1         | 63,618             | 44,767502             | 35,275486              | 0,319996                | 67,555885                | 61,02                   | -4,36                 | 51,18                |                            |                        | 17,815              | 9,26               | 12,808722                | 5,959                | 0,4066667                | 9,3668459        | 28,003081        | 62,630073          | 0,7147953                         |
| 54         | 1   | C        | 2         | 66,502             | 43,500004             | 32,423061              | 0,344997                | 75,069244                | 61,99                   | -4,67                 | 49,65                |                            |                        | 18,146              | 9,28               | 12,828722                | 5,983                | 0,425                    | 8,9967219        | 27,286397        | 63,716881          | 0,793096479                       |
| 54         | 1   | C        | 3         | 64,126             | 44,970001             | 37,077019              | 0,417492                | 75,076401                | 62                      | -3,72                 | 47,51                |                            |                        | 17,351              | 9,03               | 13,321222                | 4,993                | 0,3541667                | 7,7862334        | 27,057668        | 65,156099          | 0,928378899                       |
| 54         | 1   | C        | 4         | 62,838             | 44,665001             | 37,527401              | 0,40749                 | 86,307533                | 58                      | 0,46                  | 51,91                |                            |                        | 17,391              | 9,05               | 13,341222                | 5,277                | 0,375                    | 8,3977848        | 27,675929        | 63,926287          | 0,912325066                       |
| 54         | 1   | C        | 5         | 60,035             | 44,005001             | 31,972679              | 0,424995                | 56,240307                | 66,61                   | -4,27                 | 58,01                |                            |                        | 16,802              | 9,26               | 12,230443                | 5,063                | 0,37                     | 8,4334138        | 27,987008        | 63,579579          | 0,965787957                       |
| 54         | 1   | C        | 6         | 64,243             | 44,755001             | 39,629189              | 0,329994                | 97,590012                |                         |                       |                      |                            |                        |                     | 9,3                | 12,272443                | 5,696                | 0,3875                   | 8,8663356        |                  |                    | 0,73733436                        |
| 54         | 1   | C        | 7         | 62,74              | 43,092503             | 37,977783              | 0,302498                | 90,083092                | 66,3                    | -2,1                  | 64,02                |                            |                        | 17,092              | 9,27               | 11,964019                | 6,766                | 0,46                     | 10,784189        | 27,242588        | 61,973223          | 0,701973612                       |
| 54         | 1   | C        | 8         | 68,651             | 44,397503             | 37,227146              | 0,294994                | 112,59315                | 64,15                   | -3,06                 | 52,39                |                            | 1                      | 16,775              | 9,31               | 12,006019                | 6,999                | 0,4533333                | 10,195045        | 24,435187        | 65,369769          | 0,664438268                       |
| 54         | 1   | C        | 9         | 67,795             | 45,972504             | 36,776764              | 0,39999                 | 97,580704                | 64,65                   | -3,57                 | 47,84                |                            |                        | 17,782              | 9,24               | 12,393384                | 5,749                | 0,3908333                | 8,4799764        | 26,229073        | 65,290951          | 0,870063549                       |
| 54         | 1   | C        | 10        | 62,956             | 43,872501             | 46,985439              | 0,429989                | 60,04966                 | 66,57                   | -4,22                 | 52,27                |                            | 1                      | 17,974              | 9,28               | 12,435384                | 5,806                | 0,4083333                | 9,222314         | 28,550098        | 62,227588          | 0,980087732                       |
| 54         | 1   | C        | 11        | 65,565             | 44,272503             | 30,171148              | 0,502499                | 11,242434                | 60,94                   | -4,12                 | 52,64                |                            |                        | 17,769              | 9,24               | 13,26806                 | 7,159                | 0,4808333                | 10,918935        | 27,10135         | 61,979715          | 1,135013758                       |
| 54         | 1   | C        | 12        | 63,537             | 44,335003             | 42,781868              | 0,402493                | 86,321396                | 61,1                    | -1,26                 | 53,72                |                            |                        | 16,985              | 9,3                | 13,32806                 | 5,717                | 0,4141667                | 8,9979067        | 26,732455        | 64,269638          | 0,907844756                       |
| 54         | 1   | C        | 13        | 64,603             | 44,2225               | 50,738628              | 0,367485                | 75,06208                 | 58,42                   | -1,48                 | 49,45                |                            |                        | 18,908              | 9,09               | 12,932172                | 6,506                | 0,4525                   | 10,07074         | 29,267991        | 60,66127           | 0,830991011                       |
| 54         | 1   | C        | 14        | 67,922             | 45,592503             | 52,239906              | 0,427494                | 120,12222                | 59,66                   | -1,75                 | 51,75                |                            |                        | 18,099              | 9,13               | 12,974172                | 6,4                  | 0,4475                   | 9,422573         | 26,646742        | 63,930685          | 0,937640998                       |
| 54         | 1   | C        | 15        | 63,523             | 43,472504             | 36,326378              | 0,389988                | 71,322578                | 64,06                   | -1,13                 | 59                   | 1                          |                        | 17,179              | 9,29               |                          | 5,795                | 0,41                     | 9,12268          | 27,043748        | 63,833572          | 0,897091182                       |
| 54         | 2   | D        | 1         | 66,893             | 44,935001             | 47,135567              | 0,442486                | 78,815186                | 60,3                    | -2,29                 | 49,62                |                            |                        | 18,112              | 9,18               | 12,565819                | 6,329                | 0,4316667                | 9,4613786        | 27,076077        | 63,462545          | 0,98472458                        |
| 54         | 2   | D        | 2         | 62,497             | 44,16                 | 50,738628              | 0,394985                | 67,568756                | 66,04                   | -2,47                 | 53,53                |                            |                        | 16,377              | 9,2                | 12,585819                | 6,527                | 0,4475                   | 10,443701        | 26,204458        | 63,351841          | 0,89444067                        |
| 54         | 2   | D        | 3         | 62,717             | 43,945004             | 48,636845              | 0,412483                | 67,575203                | 62,45                   | -1,82                 | 47,74                |                            |                        | 17,333              | 9,07               | 12,66845                 | 5,92                 | 0,4166667                | 9,439227         | 27,636845        | 62,923928          | 0,938634572                       |
| 54         | 2   | D        | 4         | 66,461             | 45,1675               | 46,38493               | 0,39999                 | 63,814945                | 58,12                   | -3,51                 | 52,59                |                            |                        | 16,68               | 9,09               | 12,68845                 | 6,465                | 0,425                    | 9,7275094        | 25,097426        | 65,175065          | 0,885570377                       |
| 54         | 2   | D        | 5         | 62,542             | 43,737503             | 55,542713              | 0,412487                | 86,321404                | 63,02                   | -1,35                 | 51,09                | 1                          |                        | 16,639              | 9,19               | 12,306929                | 6,514                | 0,4533333                | 10,415401        | 26,604522        | 62,980077          | 0,94309682                        |
| 54         | 2   | D        | 6         | 66,505             | 45,567505             | 49,837864              | 0,424992                | 108,84003                | 62,57                   | -0,13                 | 53,63                |                            |                        | 17,977              | 9,23               | 12,348929                | 6,602                | 0,4483333                | 9,9270732        | 27,03105         | 63,041877          | 0,932664626                       |
| 54         | 2   | D        | 7         | 59,692             | 43,232502             |                        |                         |                          | 65,36                   | -3,66                 | 47,59                |                            |                        | 16,639              | 9,16               | 11,548381                | 5,905                | 0,4216667                | 9,8924479        | 27,874757        | 62,232795          |                                   |
| 54         | 2   | D        | 8         | 65,426             | 45,397503             | 50,88876               | 0,4375                  | 90,083092                | 62,88                   | -5,61                 | 40,14                |                            |                        | 19,362              | 9,2                | 11,590381                | 6,157                | 0,4316667                | 9,4106319        | 29,593739        | 60,995629          | 0,963709392                       |
| 54         | 2   | D        | 9         | 67,649             | 44,965                | 51,639397              | 0,412498                | 60,055401                | 67,51                   | -5,4                  | 46,37                |                            |                        | 19,939              | 9,22               | 11,351792                | 6,98                 | 0,455                    | 10,317965        | 29,474198        | 60,207838          | 0,917375737                       |
| 54         | 2   | D        | 10        | 66,536             | 45,197502             | 48,186462              | 0,412498                | 78,815186                |                         |                       |                      |                            |                        |                     | 9,26               | 11,393792                | 6,774                | 0,4625                   | 10,180955        |                  |                    | 0,912656633                       |
| 54         | 2   | D        | 11        | 69,653             | 45,837502             | 55,542713              | 0,46249                 | 127,62989                | 59,99                   | -2,45                 | 54,93                |                            |                        | 18,427              | 9,2                | 11,359522                | 6,998                | 0,4483333                | 10,046947        | 26,455429        | 63,497624          | 1,008977322                       |
| 54         | 2   | D        | 12        | 65,29              | 43,7575               | 51,639397              | 0,467487                | 67,550247                | 60,69                   | -4,47                 | 49,98                |                            |                        | 16,957              | 9,26               | 11,419522                | 6,305                | 0,4383333                | 9,6569153        | 25,971818        | 64,371267          | 1,068358567                       |
| 54         | 2   | D        | 13        | 64,987             | 44,535                | 53,140671              | 0,424992                | 86,33786                 | 63,22                   | -2,97                 | 53,53                |                            |                        | 19,968              | 9,16               | 11,641238                | 6,846                | 0,45                     | 10,534415        | 30,726145        | 58,73944           | 0,954287639                       |
| 54         | 2   | D        | 14        | 63,128             | 44,657505             | 39,479061              | 0,382496                | 71,322578                | 61,08                   | -3,78                 | 48,82                |                            |                        | 16,155              | 9,2                | 11,683238                | 5,674                | 0,3933333                | 8,9880877        | 25,590863        | 65,421049          | 0,856510009                       |
| 54         | 2   | D        | 15        | 63,328             | 43,922504             | 55,392586              | 0,424995                | 78,817085                | 64,03                   | -3,32                 | 46,46                |                            |                        | 16,855              | 9,17               |                          | 6,666                | 0,46                     | 10,52615         | 26,615399        | 62,858451          | 0,967601938                       |

Supplementary Table S1. Raw data of egg quality parameters with ATOL (Animal Trait Ontology for Livestock) descriptors, for hen.

|            |     |          |           | ATOL_<br>0001880 | ATOL_<br>0002297 | ATOL_<br>0002119  | ATOL_<br>0002126  | ATOL_<br>0002122 | ATOL_<br>0002074  | ATOL_<br>0002073 | ATOL_<br>0002075 | ATOL_<br>0005600 | ATOL_<br>0005600 | ATOL_<br>0001883 | ATOL_<br>0005587 | ATOL_<br>0001938 | ATOL_<br>1881   | ATOL_<br>0002121   | ATOL_<br>1881 | ATOL_<br>0001883 | ATOL_<br>0001882 | ATOL_<br>0002125             |
|------------|-----|----------|-----------|------------------|------------------|-------------------|-------------------|------------------|-------------------|------------------|------------------|------------------|------------------|------------------|------------------|------------------|-----------------|--------------------|---------------|------------------|------------------|------------------------------|
| Hen<br>age | Pen | Genotype | Replicate | Egg<br>weight    | Egg<br>diameter  | Shell<br>strength | Shell<br>fracture | Shell<br>modulus | Yolk<br>lightness | Yolk<br>redness  | Yolk<br>yellow   | Blood<br>spot    | Meat spot        | Yolk<br>weight   | Albumen<br>pH    | Albumen<br>DM    | Shell<br>weight | Shell<br>thickness | Shell         | Yolk             | Albumen          | Shell-to-egg-<br>compression |
| wk         | no. |          |           | g                | mm               | N                 | mm                | N/mm             | L*                | a*               | b*               | 1=present        | 1=present        | g                | -                | % (w/w)          | g               | mm                 | % (w/w)       | % (w/w)          | % (w/w)          | %                            |
| 54         | 3   | B        | 1         | 72,069           | 45,327503        | 29,870893         | 0,409988          | 75,069237        | 57,05             | 0,32             | 59,46            | 1                |                  | 19,163           | 9,16             | 11,509608        | 5,655           | 0,355              | 7,846647      | 26,589796        | 65,563557        | 0,904501622                  |
| 54         | 3   | B        | 2         | 72,356           | 45,450001        | 29,270382         | 0,329994          | 86,337875        | 63,18             | -1,26            | 55,29            | 1                |                  | 19,49            | 9,18             | 11,529608        | 6,209           | 0,4075             | 8,5811819     | 26,93626         | 64,482558        | 0,72605939                   |
| 54         | 3   | B        | 3         | 70,779           | 46,84            | 37,077019         | 0,354992          | 108,84003        | 63,82             | -3               | 55,91            |                  |                  | 20,475           | 9,19             | 11,940904        | 6,343           | 0,41               | 8,9616977     | 28,928072        | 62,11023         | 0,757882152                  |
| 54         | 3   | B        | 4         | 70,612           | 46,2075          | 27,468851         | 0,344997          | 93,819672        | 60,82             | -0,77            | 55,64            | 1                |                  | 19,077           | 9,21             | 11,960904        | 5,56            | 0,3783333          | 7,8740157     | 27,016654        | 65,10933         | 0,746625548                  |
| 54         | 3   | B        | 5         | 69,914           | 45,657501        | 36,326378         | 0,389996          | 101,32417        | 59,99             | -2,79            | 48,08            |                  |                  | 20,563           | 9,23             | 11,426811        | 6,311           | 0,4108333          | 9,0268044     | 29,411849        | 61,561347        | 0,85417728                   |
| 54         | 3   | B        | 6         | 67,124           | 44,360001        | 36,476509         | 0,45499           | 22,484869        | 67,78             | -5,14            | 48,38            | 1                |                  | 18,618           | 9,27             | 11,468811        | 6,243           | 0,4233333          | 9,3006972     | 27,736726        | 62,962577        | 1,025676262                  |
| 54         | 3   | B        | 7         | 66,766           | 45,212502        | 41,430717         | 0,427494          | 67,562325        | 58,05             | -1,52            | 41,63            | 1                |                  | 19,614           | 9,16             | 12,376661        | 5,845           | 0,3966667          | 8,7544559     | 29,377228        | 61,868316        | 0,945521661                  |
| 54         | 3   | B        | 8         | 70,746           | 44,375           | 31,22204          | 0,354996          | 60,055397        | 61,47             | -1,57            | 56,56            | 1                | 1                | 20,865           | 9,2              | 12,418661        | 6,33            | 0,4175             | 8,9475023     | 29,492834        | 61,559664        | 0,799990986                  |
| 54         | 3   | B        | 9         | 71,423           | 45,210003        | 39,629189         | 0,402489          | 71,315781        |                   |                  |                  |                  |                  |                  | 9,13             | 12,23078         | 6,212           | 0,4133333          | 8,6974784     |                  |                  | 0,890265369                  |
| 54         | 3   | B        | 10        | 69,581           | 45,727509        | 36,026123         | 0,419994          | 97,573143        | 63,61             | -1,04            | 55,95            |                  |                  | 18,804           | 9,17             | 12,27278         | 5,848           | 0,39               | 8,4045932     | 27,024619        | 64,570788        | 0,918471199                  |
| 54         | 3   | B        | 11        | 68,729           | 45,850002        | 37,077019         | 0,332493          | 112,59315        | 64,01             | -2,07            | 56,77            |                  |                  | 17,145           | 9,15             | 11,700449        | 6,317           | 0,41               | 9,1911711     | 24,945802        | 65,863027        | 0,725175541                  |
| 54         | 3   | B        | 12        | 67,554           | 44,950001        | 39,929443         | 0,414997          | 59,976536        | 64,6              | -2,38            | 51,66            |                  | 1                | 19,844           | 9,21             | 11,760449        | 5,783           | 0,4008333          | 8,560559      | 29,375019        | 62,064423        | 0,923241359                  |
| 54         | 3   | B        | 13        | 71,506           | 44,620003        | 34,674976         | 0,384983          | 78,815186        | 62,82             | -0,9             | 57,29            |                  |                  | 19,981           | 9,16             | 12,145172        | 6,108           | 0,3983333          | 8,5419405     | 27,94311         | 63,51495         | 0,862803617                  |
| 54         | 3   | B        | 14        | 68,707           | 45,587502        | 32,873447         | 0,355             | 97,580704        | 63,02             | -2,17            | 50,75            | 1                |                  | 21,779           | 9,2              | 12,187172        | 5,366           | 0,37               | 7,8099757     | 31,698371        | 60,491653        | 0,778722203                  |
| 54         | 3   | B        | 15        | 68,97            | 45,887501        | 32,272934         | 0,372486          | 105,09694        | 66,32             | -3,8             | 55,01            | 1                | 1                | 17,658           | 9,21             |                  | 5,741           | 0,3916667          | 8,3239089     | 25,602436        | 66,073655        | 0,811737384                  |
| 54         | 4   | A        | 1         | 67,147           | 45,100002        | 62,448586         | 0,484997          | 56,307297        | 56,64             | -0,6             | 56,94            |                  |                  | 20,061           | 9,21             | 13,276164        | 7,003           | 0,4741667          | 10,429356     | 29,876242        | 59,694402        | 1,075381327                  |
| 54         | 4   | A        | 2         | 66,675           | 44,987503        | 50,138344         | 0,427502          | 48,799671        | 63,84             | -2,99            | 54,75            |                  |                  | 16,587           | 9,22             | 12,600442        | 6,412           | 0,4383333          | 9,6167979     | 24,87739         | 65,505812        | 0,950268345                  |
| 54         | 4   | A        | 3         | 67,915           | 45,607498        | 49,387707         | 0,450005          | 97,599327        | 63,33             | -2,43            | 53,99            |                  |                  | 17,28            | 9,15             | 12,48591         | 6,152           | 0,4175             | 9,0583818     | 25,443569        | 65,498049        | 0,986690829                  |
| 54         | 4   | A        | 4         | 70,477           | 44,907501        | 45,634518         | 0,424995          | 60,055401        | 66,91             | -0,21            | 60,8             |                  |                  | 17,38            | 9,2              | 12,947693        | 6,732           | 0,4316667          | 9,5520524     | 24,660528        | 65,78742         | 0,946378646                  |
| 54         | 4   | A        | 5         | 67,295           | 44,530003        | 49,837864         | 0,379997          | 75,076408        | 65,46             | -3,39            | 54,87            |                  |                  | 19,937           | 9,21             | 12,448287        | 7,115           | 0,4808333          | 10,572851     | 29,626272        | 59,800877        | 0,853350493                  |
| 54         | 4   | A        | 6         | 60,589           | 41,860001        | 39,479061         | 0,377495          | 97,599342        | 59,62             | -2,56            | 54,08            |                  |                  | 19,507           | 9,25             | 12,490287        | 6,193           | 0,4666667          | 10,221327     | 32,195613        | 57,58306         | 0,90180361                   |
| 54         | 4   | A        | 7         | 72,224           | 46,3325          | 48,33659          | 0,484993          | 112,60385        | 57,3              | -2,81            | 58,6             | 1                | 1                | 19,94            | 9,12             | 13,023925        | 6,066           | 0,4658333          | 8,3988702     | 27,608551        | 63,992579        | 1,046766309                  |
| 54         | 4   | A        | 8         | 62,788           | 43,93            | 49,988216         | 0,414997          | 63,808868        | 59,64             | 0,18             | 50,22            |                  | 1                | 16,66            | 9,3              |                  | 6,382           | 0,4466667          | 10,164363     | 26,533733        | 63,301905        | 0,944677897                  |
| 54         | 4   | A        | 9         | 70,008           | 45,665001        | 44,883652         | 0,464985          | 97,590019        | 62,77             | -4,6             | 56,9             |                  |                  | 22,641           | 9,22             | 13,369119        | 5,895           | 0,3933333          | 8,4204662     | 32,34059         | 59,238944        | 1,018252469                  |
| 54         | 4   | A        | 10        | 66,481           | 45,530003        | 46,835312         | 0,467487          | 105,08692        | 65,86             | -2,01            | 56,25            |                  |                  | 20,022           | 9,26             | 13,411119        | 6,271           | 0,415              | 9,4327703     | 30,116875        | 60,450354        | 1,026766899                  |
| 54         | 4   | A        | 11        | 68,966           | 45,350006        | 50,138119         | 0,389988          | 90,074501        | 58,54             | -2,56            | 58,6             |                  |                  | 21,163           | 9,23             | 12,451805        | 7,385           | 0,5016667          | 10,708175     | 30,686135        | 58,60569         | 0,859951375                  |
| 54         | 4   | A        | 12        | 67,807           | 46,1875          | 37,527401         | 0,409992          | 116,33482        | 61,8              | -3,79            | 54,17            |                  |                  | 20,286           | 9,29             | 12,511805        | 6,034           | 0,415              | 8,8987863     | 29,917265        | 61,183949        | 0,887668742                  |
| 54         | 4   | A        | 13        | 68,21            | 45,357502        | 47,736076         | 0,444996          | 75,06208         | 59,56             | -4,4             | 46,12            |                  |                  | 20,396           | 9,2              | 12,210462        | 6,379           | 0,4241667          | 9,3520012     | 29,901774        | 60,746225        | 0,981085775                  |
| 54         | 4   | A        | 14        | 64,869           | 44,677502        | 51,038887         | 0,414989          | 86,321404        | 60,6              | -2,89            | 53,68            |                  |                  | 20,272           | 9,24             | 12,252462        | 6,155           | 0,4333333          | 9,4883535     | 31,250674        | 59,260972        | 0,928854527                  |
| 54         | 4   | A        | 15        | 65,979           | 44,442501        | 39,779316         | 0,452496          | 67,506058        | 56,75             | -1,99            | 48,84            |                  |                  | 20,262           | 9,26             |                  | 5,85            | 0,4025             | 8,8664575     | 30,709771        | 60,423771        | 1,018160522                  |
| 54         | 5   | B        | 1         | 70,596           | 45,485004        | 40,079571         | 0,362492          | 116,34046        | 59,92             | 0,04             | 53,11            |                  |                  | 19,925           | 9,2              | 13,739162        | 6,433           | 0,4166667          | 9,1124143     | 28,223979        | 62,663607        | 0,796948374                  |
| 54         | 5   | B        | 2         | 69,146           | 45,695           | 46,234802         | 0,492489          | 101,3435         | 59,76             | 0,69             | 62,51            |                  |                  | 18,958           | 9,22             | 13,759162        | 5,733           | 0,3766667          | 8,2911521     | 27,417349        | 64,291499        | 1,077774374                  |
| 54         | 5   | B        | 3         | 62,011           | 43,1325          | 32,72332          | 0,414986          | 56,301941        | 62,69             | -2,57            | 56,57            |                  |                  | 18,967           | 9,25             | 13,716125        | 5,44            | 0,3783333          | 8,7726371     | 30,586509        | 60,640854        | 0,962119052                  |
| 54         | 5   | B        | 4         | 67,09            | 44,195           | 31,822552         | 0,384995          | 56,307301        | 66,99             | -0,9             | 58,66            |                  |                  | 17,263           | 9,27             | 13,736125        | 5,836           | 0,4033333          | 8,6987629     | 25,731107        | 65,57013         | 0,871127956                  |
| 54         | 5   | B        | 5         | 67,371           | 45,080002        | 39,178802         | 0,437485          | 60,061119        | 62,33             | -1,18            | 53,13            |                  |                  | 17,775           | 9,17             | 13,317063        | 5,772           | 0,3933333          | 8,5674845     | 26,383756        | 65,04876         | 0,970463577                  |
| 54         | 5   | B        | 6         | 68,446           | 43,4575          | 32,573189         | 0,409996          | 67,516495        | 64,43             | -0,34            | 52,77            | 1                | 1                | 20,399           | 9,21             | 13,359063        | 5,641           | 0,375              | 8,2415335     | 29,803056        | 61,95541         | 0,943441293                  |
| 54         | 5   | B        | 7         | 70,902           | 45,830002        | 47,585949         | 0,452492          | 97,550644        | 63,53             | -1,79            | 53,1             |                  |                  | 18,785           | 9,22             | 12,964782        | 6,965           | 0,4475             | 9,8234182     | 26,494316        | 63,682266        | 0,987327035                  |
| 54         | 5   | B        | 8         | 67,334           | 43,952503        | 46,535057         | 0,377491          | 71,308975        | 66,96             | -3,24            | 58,62            |                  |                  | 17,535           | 9,26             | 13,006782        | 6,906           | 0,455              | 10,256334     | 26,041821        | 63,701845        | 0,858861212                  |
| 54         | 5   | B        | 9         | 68,155           | 45,127502        | 51,489269         | 0,424988          | 63,81496         | 65,96             | -0,45            | 54,22            | 1                |                  | 18,322           | 9,22             | 14,094781        | 6,714           | 0,4333333          | 9,8510748     | 26,882841        | 63,266085        | 0,941749446                  |
| 54         | 5   | B        | 10        | 71,988           | 46,3475          | 41,130463         | 0,389992          | 127,61771        | 63,27             | -2,21            | 59,79            | 1                |                  | 18,943           | 9,26             | 14,136781        | 6,192           | 0,3941667          | 8,6014336     | 26,314108        | 65,084459        | 0,841452074                  |
| 54         | 5   | B        | 11        | 64,898           | 44,2925          | 40,379826         | 0,334984          | 86,321404        | 54,17             | -0,46            | 57,37            | 1                |                  | 19,215           | 9,29             | 12,690848        | 5,992           | 0,4066667          | 9,2329502     | 29,608           | 61,15905         | 0,756299599                  |
| 54         | 5   | B        | 12        | 71,486           | 45,4175          |                   |                   | 61,09            |                   | -1,43            | 56,8             |                  | 1                | 20,02            | 9,35             | 12,750848        | 6,547           | 0,4158333          | 9,1584366     | 28,005484        | 62,83608         |                              |
| 54         | 5   | B        | 13        | 61,264           | 43,0625          | 29,720764         | 0,387497          | 63,718838        | 63,95             | -4,34            | 50,43            | 1                |                  | 17,75            | 9,25             | 13,822352        | 5,585           | 0,3958333          | 9,1162836     | 28,972969        | 61,910747        | 0,899847896                  |
| 54         | 5   | B        | 14        | 66,418           | 44,215           | 49,537609         | 0,442497          | 60,049671        | 63,95             | -4,5             | 42,35            |                  |                  | 17,809           | 9,29             | 13,864352        | 6,64            | 0,4533333          | 9,9972899     | 26,813514        | 63,189196        | 1,000784802                  |
| 54         | 5   | B        | 15        | 65,394           | 44,545002        | 38,278038         | 0,419994          | 78,77018         | 62,26             | -3,56            | 59,05            | 1                |                  | 17,575           | 9,33             |                  | 5,523           | 0,3808333          | 8,445729      | 26,875554        | 64,678717        | 0,942853252                  |

Supplementary Table S1. Raw data of egg quality parameters with ATOL (Animal Trait Ontology for Livestock) descriptors, for hen.

| Hen<br>age | Pen | Genotype | Replicate | ATOL_<br>0001880   | ATOL_<br>0002297      | ATOL_<br>0002119       | ATOL_<br>0002126        | ATOL_<br>0002122         | ATOL_<br>0002074        | ATOL_<br>0002073      | ATOL_<br>0002075     | ATOL_<br>0005600           | ATOL_<br>0005600       | ATOL_<br>0001883    | ATOL_<br>0005587   | ATOL_<br>0001938         | ATOL_<br>1881        | ATOL_<br>0002121         | ATOL_<br>1881    | ATOL_<br>0001883 | ATOL_<br>0001882   | ATOL_<br>0002125                  |
|------------|-----|----------|-----------|--------------------|-----------------------|------------------------|-------------------------|--------------------------|-------------------------|-----------------------|----------------------|----------------------------|------------------------|---------------------|--------------------|--------------------------|----------------------|--------------------------|------------------|------------------|--------------------|-----------------------------------|
|            |     |          |           | Egg<br>weight<br>g | Egg<br>diameter<br>mm | Shell<br>strength<br>N | Shell<br>fracture<br>mm | Shell<br>modulus<br>N/mm | Yolk<br>lightness<br>L* | Yolk<br>redness<br>a* | Yolk<br>yellow<br>b* | Blood<br>spot<br>1=present | Meat spot<br>1=present | Yolk<br>weight<br>g | Albumen<br>pH<br>- | Albumen<br>DM<br>% (w/w) | Shell<br>weight<br>g | Shell<br>thickness<br>mm | Shell<br>% (w/w) | Yolk<br>% (w/w)  | Albumen<br>% (w/w) | Shell-to-egg-<br>compression<br>% |
| 54         | 6   | C        | 1         | 66,709             | 45,150002             | 33,62431               | 0,499989                | 52,480953                | 51,68                   | 0,31                  | 65,06                |                            |                        | 16,092              | 9,23               | 12,592291                | 5,572                | 0,385                    | 8,352696         | 24,122682        | 67,524622          | 1,1073953                         |
| 54         | 6   | C        | 2         | 65,39              | 44,502502             | 47,285919              | 0,384998                | 82,57618                 | 59,25                   | -1,38                 | 59,4                 |                            |                        | 17,839              | 9,25               | 12,612291                | 6,683                | 0,4508333                | 10,220217        | 27,28093         | 62,498853          | 0,865115404                       |
| 54         | 6   | C        | 3         | 63,994             | 43,019997             | 38,128136              | 0,379986                | 60,044037                | 65,88                   | -4,9                  | 52,72                |                            |                        | 18,089              | 9,17               | 13,297241                | 6,148                | 0,4416667                | 9,6071507        | 28,266713        | 62,126137          | 0,883277607                       |
| 54         | 6   | C        | 4         | 68,893             | 44,807503             | 45,334263              | 0,352489                | 86,321396                | 65,47                   | -4,39                 | 58,44                |                            |                        | 17,599              | 9,19               | 13,317241                | 7,178                | 0,4783333                | 10,419056        | 25,545411        | 64,035533          | 0,786674053                       |
| 54         | 6   | C        | 5         | 65,63              | 45,654999             | 51,18924               | 0,437504                | 105,10696                | 66,86                   | -3,92                 | 52,36                |                            |                        | 18,494              | 9,22               | 12,891183                | 6,447                | 0,4383333                | 9,8232516        | 28,179186        | 61,997562          | 0,958282794                       |
| 54         | 6   | C        | 6         | 64,818             | 44,192505             | 41,430943              | 0,389999                | 60,043949                | 65,02                   | -0,62                 | 61,93                |                            |                        | 17,025              | 9,26               | 12,933183                | 6,081                | 0,4166667                | 9,3816532        | 26,265852        | 64,352495          | 0,882500324                       |
| 54         | 6   | C        | 7         | 63,365             | 43,834999             | 43,232475              | 0,39999                 | 67,568771                | 43,3                    | 1,12                  | 47,23                |                            |                        | 17,516              | 9,29               | 13,238833                | 6,223                | 0,4266667                | 9,820879         | 27,643021        | 62,5361            | 0,91249004                        |
| 54         | 6   | C        | 8         | 68,863             | 44,247498             | 53,591282              | 0,407486                | 71,315781                | 58,85                   | 1,1                   | 53,07                |                            |                        | 18,34               | 9,33               | 13,280833                | 7,226                | 0,4633333                | 10,493298        | 26,632589        | 62,874112          | 0,920924388                       |
| 54         | 6   | C        | 9         | 67,145             | 45,112503             | 40,680305              | 0,394989                | 60,055401                | 60,92                   | -1,72                 | 48,05                |                            |                        | 17,789              | 9,22               | 14,138292                | 5,755                | 0,3766667                | 8,5710031        | 26,49341         | 64,935587          | 0,875564364                       |
| 54         | 6   | C        | 10        | 64,967             | 43,510002             | 47,886433              | 0,397488                | 75,069244                | 63,53                   | -3,72                 | 46,11                |                            |                        | 17,331              | 9,26               | 14,180292                | 6,65                 | 0,4425                   | 10,235966        | 26,67662         | 63,087414          | 0,913555462                       |
| 54         | 6   | C        | 11        | 65,006             | 44,402496             | 44,883881              | 0,380005                | 75,069252                | 63,11                   | -2,82                 | 57,57                |                            | 1                      | 17,71               | 9,18               | 9,476008                 | 6,07                 | 0,4066667                | 9,3375996        | 27,243639        | 63,418761          | 0,855819006                       |
| 54         | 6   | C        | 12        | 64,133             | 44,1875               | 46,835537              | 0,467491                | 60,049767                | 61,93                   | -5,04                 | 47,62                |                            | 1                      | 19,029              | 9,24               | 9,536008                 | 5,717                | 0,405                    | 8,9142875        | 29,671152        | 61,41456           | 1,057971146                       |
| 54         | 6   | C        | 13        | 67,862             | 44,934998             | 45,184135              | 0,355007                | 71,308983                | 61,76                   | -3,81                 | 52                   |                            |                        | 17,577              | 9,18               | 13,108195                | 7,007                | 0,4616667                | 10,325366        | 25,901093        | 63,77354           | 0,790045657                       |
| 54         | 6   | C        | 14        | 64,773             | 44,962502             | 30,021246              | 0,342495                | 60,061119                | 64,43                   | -4,52                 | 47,88                |                            | 1                      | 18,025              | 9,22               | 13,150195                | 5,09                 | 0,3733333                | 7,8582125        | 27,827953        | 64,313834          | 0,761734745                       |
| 54         | 6   | C        | 15        | 62,169             | 43,1875               | 62,448811              | 0,469997                | 71,308975                | 61,43                   | -2,89                 | 48,88                |                            |                        | 16,839              | 9,36               |                          | 6,796                | 0,4716667                | 10,931493        | 27,085847        | 61,98266           | 1,088270912                       |
| 54         | 7   | A        | 1         | 67,835             | 43,707497             | 53,741409              | 0,4175                  | 71,308983                | 60,63                   | -2,36                 | 52,31                |                            | 1                      | 20,585              | 9,24               | 12,236326                | 7,055                | 0,4766667                | 10,400236        | 30,345692        | 59,254072          | 0,955213702                       |
| 54         | 7   | A        | 2         | 68,949             | 44,417503             | 47,285919              | 0,429996                | 67,575211                | 64,41                   | -2,75                 | 57,84                |                            | 1                      | 21,451              | 9,26               | 12,256326                | 6,726                | 0,4458333                | 9,7550363        | 31,111401        | 59,133562          | 0,968077832                       |
| 54         | 7   | A        | 3         | 64,172             | 44,372498             | 39,329159              | 0,417503                | 60,066864                | 58,39                   | -1,76                 | 51,95                |                            |                        | 18,441              | 9,25               | 12,225563                | 5,431                | 0,3883333                | 8,4631927        | 28,736832        | 62,799975          | 0,940904882                       |
| 54         | 7   | A        | 4         | 67,443             | 44,512497             | 54,492046              | 0,39249                 | 86,313171                | 64,04                   | -2,06                 | 54,15                |                            |                        | 15,714              | 9,12               | 14,104561                | 6,99                 | 0,46                     | 10,364308        | 23,299675        | 66,336017          | 0,881752376                       |
| 54         | 7   | A        | 5         | 66,93              | 45,779999             | 60,196896              | 0,484989                | 108,86077                | 57,89                   | -0,67                 | 59,52                |                            |                        | 20,518              | 9,23               | 12,625856                | 6,682                | 0,4691667                | 9,9835649        | 30,655909        | 59,360526          | 1,059390587                       |
| 54         | 7   | A        | 6         | 64,351             | 45,305                | 53,291023              | 0,357491                | 75,06208                 | 63,1                    | -2,26                 | 56,23                |                            |                        | 19,393              | 9,27               | 12,667856                | 7,345                | 0,4966667                | 11,413964        | 30,136284        | 58,449752          | 0,789076261                       |
| 54         | 7   | A        | 7         | 67,06              | 45,139999             | 58,695618              | 0,467503                | 71,329391                | 68,61                   | -2,81                 | 57,84                |                            |                        | 18,092              | 9,18               | 13,179413                | 6,775                | 0,4575                   | 10,102893        | 26,978825        | 62,918282          | 1,035673483                       |
| 54         | 7   | A        | 8         | 63,318             | 43,415001             | 47,886433              | 0,46751                 | 63,808853                | 57,93                   | -1,01                 | 60,48                |                            |                        | 21,043              | 9,22               | 13,221413                | 5,711                | 0,465                    | 9,0195521        | 33,233836        | 57,746612          | 1,076839777                       |
| 54         | 7   | A        | 9         | 65,848             | 44,970001             | 43,082348              | 0,389999                | 67,55587                 | 52,13                   | -0,99                 | 48,92                |                            |                        | 19,487              | 9,23               | 12,217181                | 6,294                | 0,435                    | 9,5583769        | 29,593913        | 60,84771           | 0,867242587                       |
| 54         | 7   | A        | 10        | 69,938             | 44,894997             | 56,293575              | 0,447487                | 71,315781                | 62,53                   | 1,56                  | 61,21                |                            |                        | 20,056              | 9,27               | 12,259181                | 6,579                | 0,4141667                | 9,4069033        | 28,676828        | 61,916269          | 0,996741352                       |
| 54         | 7   | A        | 11        | 66,391             | 45,422501             | 58,995872              | 0,460007                | 60,055389                | 60,29                   | -0,15                 | 57,73                |                            |                        | 21,085              | 9,19               | 12,653101                | 6,611                | 0,4458333                | 9,957675         | 31,758823        | 58,283502          | 1,012729352                       |
| 54         | 7   | A        | 12        | 67,998             | 45,067497             | 49,537834              | 0,467506                | 60,061119                | 59,58                   | -3,18                 | 57,23                |                            |                        | 22,198              | 9,25               | 12,713101                | 6,221                | 0,4158333                | 9,1487985        | 32,645078        | 58,206124          | 1,037346272                       |
| 54         | 7   | A        | 13        | 62,91              | 43,504997             | 49,687962              | 0,379986                | 75,076401                | 60,28                   | -3,37                 | 46,33                |                            | 1                      | 19,169              | 9,29               | 12,571073                | 6,986                | 0,4933333                | 11,104753        | 30,470513        | 58,424734          | 0,8734307                         |
| 54         | 7   | A        | 14        | 64,348             | 44,067497             | 54,341919              | 0,43                    | 67,555885                | 67,54                   | -4,53                 | 51,69                |                            |                        | 19,575              | 9,29               |                          | 6,557                | 0,4716667                | 10,189905        | 30,420526        | 59,389569          | 0,975775865                       |
| 54         | 7   | A        | 15        | 65,437             | 44,974998             | 65,751617              | 0,407486                | 82,568291                | 60,26                   | -2,06                 | 48,6                 |                            | 1                      | 17,175              | 9,31               |                          | 7,442                | 0,515                    | 11,372771        | 26,246619        | 62,38061           | 0,906027834                       |
| 54         | 8   | D        | 1         | 64,547             | 45                    | 49,687962              | 0,420002                | 56,318058                | 49,16                   | 1,07                  | 38,24                |                            |                        |                     | 9,12               | 11,925484                | 6,259                | 0,455                    | 9,6968101        |                  |                    | 0,933337778                       |
| 54         | 8   | D        | 2         | 62,945             | 44,357498             | 34,374947              | 0,382504                | 63,802773                | 66,86                   | -3,98                 | 49,41                |                            |                        | 18,472              | 9,14               | 11,945484                | 5,367                | 0,39                     | 8,5264914        | 29,346255        | 62,127254          | 0,862320954                       |
| 54         | 8   | D        | 3         | 63,511             | 44,450005             | 51,18924               | 0,407501                | 75,06208                 | 64,75                   | -3,24                 | 53,95                |                            |                        | 17,505              | 9,19               | 12,461993                | 6,202                | 0,4483333                | 9,7652375        | 27,562155        | 62,672608          | 0,916762552                       |
| 54         | 8   | D        | 4         | 64,136             | 45,142502             | 53,891537              | 0,434994                | 67,562325                | 67,54                   | -4,24                 | 45,9                 |                            |                        | 17,276              | 9,23               | 12,503993                | 6,493                | 0,4583333                | 10,123799        | 26,93651         | 62,939691          | 0,963601885                       |
| 54         | 8   | D        | 5         | 63,753             | 44,252502             | 51,639622              | 0,429993                | 78,815193                | 58,3                    | -3,75                 | 56,21                |                            |                        | 16,361              | 9,21               | 12,663366                | 6,507                | 0,4475                   | 10,206579        | 25,663106        | 64,130315          | 0,971680652                       |
| 54         | 8   | D        | 6         | 59,693             | 43,682503             | 51,639622              | 0,437496                | 71,31015                 | 54,97                   | -3,81                 | 52,95                |                            |                        | 16,877              | 9,25               | 12,705366                | 6,152                | 0,4483333                | 10,306066        | 28,272997        | 61,420937          | 1,001536015                       |
| 54         | 8   | D        | 7         | 66,722             | 45,905006             | 55,542938              | 0,410004                | 135,12465                | 61,03                   | -2,41                 | 53,01                |                            |                        | 18,501              | 9                  | 12,71143                 | 6,583                | 0,4433333                | 9,866311         | 27,728485        | 62,405204          | 0,893157491                       |
| 54         | 8   | D        | 8         | 67,512             | 44,932503             | 37,227371              | 0,355                   | 60,055401                | 63,66                   | -3,43                 | 51,53                |                            |                        | 16,214              | 9,04               | 12,75343                 | 6,36                 | 0,4483333                | 9,4205475        | 24,016471        | 66,562981          | 0,790073947                       |
| 54         | 8   | D        | 9         | 63,183             | 43,970001             | 22,364737              | 0,237499                | 63,808861                | 61,72                   | -2,54                 | 51,44                |                            |                        | 16,637              | 8,89               | 12,018193                | 6,175                | 0,4316667                | 9,7731985        | 26,33145         | 63,895352          | 0,540138719                       |
| 54         | 8   | D        | 10        | 54,975             | 42,817497             | 53,741409              | 0,439983                | 82,576164                | 61,22                   | -4,1                  | 48,47                |                            |                        | 15,774              | 8,95               | 12,078193                | 5,762                | 0,4433333                | 10,481128        | 28,693042        | 60,82583           | 1,027577581                       |
| 54         | 8   | D        | 11        | 57,356             | 42,290001             | 57,344471              | 0,422493                | 86,321396                | 63,49                   | -2,81                 | 50,47                |                            |                        | 15,039              | 9,18               | 12,239766                | 6,682                | 0,5333333                | 11,650045        | 26,220448        | 62,129507          | 0,999037574                       |
| 54         | 8   | D        | 12        | 65,419             | 44,540001             | 18,46142               | 0,162495                | 112,60385                | 63,62                   | -3,11                 | 48,97                |                            |                        | 17,155              | 9,22               | 12,281766                | 7,307                | 0,4916667                | 11,169538        | 26,223268        | 62,607194          | 0,364829359                       |
| 54         | 8   | D        | 13        | 59,91              | 43,300003             | 48,937325              | 0,420006                | 75,069244                | 69,24                   | -3,55                 | 52,93                |                            |                        | 16,869              | 9,18               | 11,982154                | 6,104                | 0,4441667                | 10,188616        | 28,157236        | 61,654148          | 0,969990695                       |
| 54         | 8   | D        | 14        | 61,331             | 44,167503             | 46,985664              | 0,415012                | 78,783325                | 65,47                   | -3,54                 | 51,94                |                            |                        | 16,545              | 9,2                | 12,003154                | 5,983                | 0,4183333                | 9,7552624        | 26,97657         | 63,268168          | 0,939632019                       |
| 54         | 8   | D        | 15        | 65,341             | 44,285004             | 57,794853              | 0,380001                | 78,837746                | 61,66                   | 1,79                  | 57,63                |                            |                        | 16,194              | 9,24               |                          | 7,528                | 0,5183333                | 11,521097        | 24,783826        | 63,695077          | 0,858080537                       |

Supplementary Table S1. Raw data of egg quality parameters with ATOL (Animal Trait Ontology for Livestock) descriptors, for hen.

| Hen<br>age | Pen | Genotype | Replicate | ATOL_<br>0001880 | ATOL_<br>0002297 | ATOL_<br>0002119  | ATOL_<br>0002126  | ATOL_<br>0002122 | ATOL_<br>0002074  | ATOL_<br>0002073 | ATOL_<br>0002075 | ATOL_<br>0005600 | ATOL_<br>0005600 | ATOL_<br>0001883 | ATOL_<br>0005587 | ATOL_<br>0001938 | 1881            | ATOL_<br>0002121   | 1881      | ATOL_<br>0001883 | ATOL_<br>0001882 | ATOL_<br>0002125             |
|------------|-----|----------|-----------|------------------|------------------|-------------------|-------------------|------------------|-------------------|------------------|------------------|------------------|------------------|------------------|------------------|------------------|-----------------|--------------------|-----------|------------------|------------------|------------------------------|
|            |     |          |           | Egg<br>weight    | Egg<br>diameter  | Shell<br>strength | Shell<br>fracture | Shell<br>modulus | Yolk<br>lightness | Yolk<br>redness  | Yolk<br>yellow   | Blood<br>spot    | Meat spot        | Yolk<br>weight   | Albumen<br>pH    | Albumen<br>DM    | Shell<br>weight | Shell<br>thickness | Shell     | Yolk             | Albumen          | Shell-to-egg-<br>compression |
|            |     |          |           | g                | mm               | N                 | mm                | N/mm             | L*                | a*               | b*               | 1=present        | 1=present        | g                | -                | % (w/w)          | g               | mm                 | % (w/w)   | % (w/w)          | % (w/w)          | %                            |
| 54         | 9   | D        | 1         | 59,462           | 43,432503        | 46,68541          | 0,399986          | 75,054924        | 62,47             | -1,44            | 48,08            |                  |                  | 15,998           | 9,2              | 11,84798         | 6,114           | 0,4583333          | 10,282197 | 26,904578        | 62,813225        | 0,920937023                  |
| 54         | 9   | D        | 2         | 62,085           | 44,349998        | 49,387707         | 0,419994          | 82,576172        | 57,58             | -4,59            | 50,87            |                  |                  | 16,871           | 9,22             | 11,86798         | 6,196           | 0,4266667          | 9,9798663 | 27,174036        | 62,846098        | 0,946998915                  |
| 54         | 9   | D        | 3         | 65,872           | 46,065002        | 38,728645         | 0,467495          | 86,307129        | 56,36             | -0,07            | 47,5             |                  |                  | 18,545           | 9,18             | 13,236269        | 5,528           | 0,3983333          | 8,392033  | 28,153085        | 63,454882        | 1,014859394                  |
| 54         | 9   | D        | 4         | 64,809           | 44,842499        | 57,494598         | 0,342491          | 97,590019        | 57,45             | -1,41            | 46,18            |                  |                  | 15,81            | 9,2              | 13,256269        | 7,196           | 0,4858333          | 11,103396 | 24,39476         | 64,501844        | 0,763764303                  |
| 54         | 9   | D        | 5         | 60,631           | 43,702499        | 55,542938         | 0,454994          | 44,996532        | 56,15             | -0,14            | 48,46            |                  |                  | 16,181           | 9,22             | 11,929078        | 6,489           | 0,4641667          | 10,702446 | 26,687668        | 62,609886        | 1,041116665                  |
| 54         | 9   | D        | 6         | 64,607           | 44,547501        | 45,184135         | 0,387493          | 67,562325        | 61,67             | -4,64            | 53,09            |                  |                  | 16,559           | 9,26             | 11,971078        | 6,208           | 0,4216667          | 9,6088659 | 25,63035         | 64,760784        | 0,869842284                  |
| 54         | 9   | D        | 7         | 59,253           | 43,205002        | 55,843193         | 0,449997          | 71,308983        | 62,09             | 1,06             | 50,65            |                  |                  | 17,23            | 9,15             | 11,43805         | 6,51            | 0,485              | 10,986785 | 29,078696        | 59,934518        | 1,041539125                  |
| 54         | 9   | D        | 8         | 63,431           | 44,202499        | 51,339367         | 0,369995          | 78,815186        |                   |                  |                  |                  |                  | 18,661           | 9,19             | 11,48005         | 6,271           | 0,4366667          | 9,8863332 | 29,419369        | 60,694298        | 0,837045435                  |
| 54         | 9   | D        | 9         | 61,787           | 43,332497        | 55,392811         | 0,387497          | 90,083092        | 62,55             | -2,55            | 54,45            |                  |                  | 15,985           | 9,16             | 11,680783        | 6,939           | 0,4816667          | 11,230518 | 25,871138        | 62,898344        | 0,894241105                  |
| 54         | 9   | D        | 10        | 65,462           | 44,300003        | 43,53273          | 0,3675            | 75,062088        | 59,67             | -2,67            | 53,31            |                  |                  | 18,271           | 9,2              | 11,722783        | 6,579           | 0,4416667          | 10,050105 | 27,910849        | 62,039046        | 0,82957105                   |
| 54         | 9   | D        | 11        | 63,69            | 45,364998        | 48,336815         | 0,422497          | 90,09465         | 56,91             | -1,6             | 50,98            |                  |                  | 17,417           | 9,2              | 12,293828        | 5,893           | 0,4166667          | 9,2526299 | 27,346522        | 63,400848        | 0,931328157                  |
| 54         | 9   | D        | 12        | 62,459           | 44,422501        | 57,194344         | 0,459991          | 78,807671        | 62,85             | -1,26            | 53,56            |                  |                  | 17,65            | 9,26             | 12,353828        | 6,018           | 0,4416667          | 9,6351206 | 28,258538        | 62,106342        | 1,035491                     |
| 54         | 9   | D        | 13        | 59,894           | 43,592499        | 42,331711         | 0,374992          | 75,069244        | 58,75             | -1,21            | 46,98            |                  |                  | 16,683           | 9,18             | 11,513501        | 6,006           | 0,44               | 10,027716 | 27,854209        | 62,118075        | 0,860221388                  |
| 54         | 9   | D        | 14        | 64,788           | 44,449997        | 50,588726         | 0,392502          | 75,062088        | 59,61             | -2,6             | 42,71            |                  |                  | 17,994           | 9,22             | 11,555501        | 6,728           | 0,45               | 10,384639 | 27,773662        | 61,841699        | 0,883019182                  |
| 54         | 9   | D        | 15        | 65,268           | 44,592499        | 54,191792         | 0,429989          | 82,576164        | 57,85             | 0,27             | 56,04            |                  | 1                | 18,112           | 9,19             |                  | 6,333           | 0,4416667          | 9,7030704 | 27,750199        | 62,54673         | 0,96426307                   |
| 54         | 11  | C        | 1         | 70,372           | 45,25            | 33,774437         | 0,502495          |                  | 62,45             | -3,46            | 49,56            |                  |                  | 17,841           | 9,17             | 12,566453        | 6,011           | 0,4025             | 8,5417496 | 25,352413        | 66,105838        | 1,110486188                  |
| 54         | 11  | C        | 2         | 61,471           | 44,892502        | 28,970352         | 0,332497          | 63,803234        | 62,46             | -3,81            | 50,7             | 1                |                  | 16,459           | 9,19             | 12,586453        | 4,97            | 0,3766667          | 8,0851133 | 26,775227        | 65,139659        | 0,740651523                  |
| 54         | 11  | C        | 3         | 68,312           | 45,157501        | 55,392811         | 0,382496          | 86,337875        | 60,11             | 1,93             | 56,78            |                  |                  | 18,097           | 9,21             | 12,762277        | 6,711           | 0,4416667          | 9,8240426 | 26,491685        | 63,684272        | 0,8470265                    |
| 54         | 11  | C        | 4         | 67,164           | 45,3825          | 34,825329         | 0,464993          | 71,296555        | 61,38             | -3,84            | 51,37            |                  | 1                | 18,486           | 9,23             | 12,782277        | 5,124           | 0,3658333          | 7,629087  | 27,523673        | 64,84724         | 1,024608605                  |
| 54         | 11  | C        | 5         | 58,49            | 43,330002        | 30,171373         | 0,502495          | 7,495672         | 64,72             | -4,24            | 49,51            |                  |                  | 16,313           | 9,2              | 12,094259        | 5,494           | 0,4033333          | 9,3930586 | 27,890238        | 62,716704        | 1,159693                     |
| 54         | 11  | C        | 6         | 70,395           | 45,447502        | 39,329159         | 0,389999          | 78,815186        | 64,1              | -3,7             | 51,37            |                  | 1                | 19,089           | 9,24             | 12,136259        | 6,525           | 0,4216667          | 9,2691242 | 27,116983        | 63,613893        | 0,858130773                  |
| 54         | 11  | C        | 7         | 66,754           | 45,107498        | 47,436047         | 0,385006          | 82,584045        | 64,31             | -1,32            | 60,1             |                  |                  | 18,783           | 9,17             | 11,68647         | 6,011           | 0,4116667          | 9,0047038 | 28,13764         | 62,857656        | 0,853529939                  |
| 54         | 11  | C        | 8         | 64,792           | 44,264999        | 42,181583         | 0,352497          | 78,800163        | 49,58             | -1,25            | 58,56            |                  |                  |                  | 9,21             | 11,72847         | 6,294           | 0,44               | 9,7141622 |                  |                  | 0,796333464                  |
| 54         | 11  | C        | 9         | 63,977           | 44,637497        | 37,978008         | 0,322502          | 86,313171        | 65,63             | -3,86            | 49,49            |                  |                  | 17,596           | 9,22             | 11,927791        | 5,718           | 0,3933333          | 8,9375869 | 27,503634        | 63,558779        | 0,722491227                  |
| 54         | 11  | C        | 10        | 63,84            | 43,705002        | 34,675201         | 0,355             | 78,817093        | 59,8              | -0,17            | 60,55            |                  |                  | 18,153           | 9,26             | 11,969791        | 5,423           | 0,3933333          | 8,4946742 | 28,43515         | 63,070175        | 0,812264006                  |
| 54         | 11  | C        | 11        | 65,958           | 44,9375          | 47,135792         | 0,39249           | 67,562325        | 65,83             | -3,64            | 57,81            |                  |                  | 18,624           | 9,24             | 12,279293        | 6,775           | 0,4691667          | 10,271688 | 28,23615         | 61,492162        | 0,873413074                  |
| 54         | 11  | C        | 12        | 66,185           | 43,472504        | 36,026348         | 0,34499           | 78,815186        | 63,32             | -3,83            | 51,75            |                  |                  | 19,145           | 9,3              | 12,339293        | 6,112           | 0,4116667          | 9,2347209 | 28,926494        | 61,838785        | 0,793582077                  |
| 54         | 11  | C        | 13        | 68,701           | 44,544998        | 50,888985         | 0,389999          | 78,837738        | 65,99             | -2,58            | 57,5             |                  |                  | 19,033           | 9,2              | 12,225553        | 6,343           | 0,4283333          | 9,2327623 | 27,704109        | 63,063129        | 0,875516932                  |
| 54         | 11  | C        | 14        | 65,153           | 43,565002        | 42,181583         | 0,40749           | 67,549431        | 62,4              | -4,85            | 53,13            | 1                |                  | 18,803           | 9,24             | 12,267553        | 6,272           | 0,435              | 9,6265713 | 28,859761        | 61,513668        | 0,935360912                  |
| 54         | 11  | C        | 15        | 69,976           | 45,607498        | 37,527626         | 0,402481          | 93,827606        | 62,59             | -3,05            | 47,2             |                  |                  | 18,237           | 9,18             |                  | 5,969           | 0,4083333          | 8,5300675 | 26,061793        | 65,40814         | 0,882488664                  |
| 54         | 12  | B        | 1         | 71,213           | 46,195           | 43,382603         | 0,440002          | 105,09694        | 57,31             | -2,5             | 48,23            |                  |                  | 20,974           | 9,16             | 11,726941        | 6,522           | 0,4116667          | 9,1584402 | 29,452488        | 61,389072        | 0,952488365                  |
| 54         | 12  | B        | 2         | 68,835           | 45,120003        | 25,9678           | 0,332493          | 63,768562        | 63,71             | -1,21            | 61,57            |                  |                  | 18,919           | 9,18             | 11,746941        | 5,416           | 0,3591667          | 7,8680904 | 27,484565        | 64,647345        | 0,736908196                  |
| 54         | 12  | B        | 3         | 71,8             | 46,390007        | 34,224819         | 0,399982          | 97,599327        | 62,8              | -2,14            | 57,76            |                  |                  | 19,842           | 9,2              | 12,892086        | 5,349           | 0,3633333          | 7,4498607 | 27,635097        | 64,915042        | 0,862215865                  |
| 54         | 12  | B        | 4         | 64,724           | 43,879997        | 38,878773         | 0,412498          | 71,296555        | 61,56             | -2,63            | 54,12            |                  |                  | 18,884           | 9,22             | 12,912086        | 5,699           | 0,3958333          | 8,80508   | 29,176194        | 62,018726        | 0,940059317                  |
| 54         | 12  | B        | 5         | 65,406           | 44,904999        | 39,479286         | 0,399994          | 60,061119        | 59,15             | -2,32            | 58,54            |                  | 1                | 18,877           | 9,15             | 11,854           | 5,78            | 0,3941667          | 8,8371097 | 28,861267        | 62,301624        | 0,89075606                   |
| 54         | 12  | B        | 6         | 67,387           | 45,404999        | 46,985664         | 0,387497          | 93,818665        | 52,95             | -1,29            | 69,49            |                  |                  | 18,493           | 9,19             | 11,896           | 6,206           | 0,4166667          | 9,2094914 | 27,442979        | 63,34753         | 0,853423651                  |
| 54         | 12  | B        | 7         | 70,528           | 45,864998        | 37,227371         | 0,424995          | 108,76776        | 62,18             | -4,83            | 49,24            |                  |                  | 19,283           | 9,08             | 12,921932        | 5,99            | 0,4041667          | 8,4930808 | 27,340914        | 64,166005        | 0,926621647                  |
| 54         | 12  | B        | 8         | 73,027           | 45,972504        | 36,927116         | 0,372498          | 93,827606        | 62,17             | -3,91            | 48,05            |                  |                  | 19,965           | 9,12             | 12,963932        | 5,704           | 0,3916667          | 7,8108097 | 27,339203        | 64,849987        | 0,810262587                  |
| 54         | 12  | B        | 9         | 64,559           | 44,400002        | 36,776989         | 0,37249           | 78,807678        | 55,22             | -0,27            | 65,65            |                  |                  | 17,746           | 9,06             | 11,604738        | 5,263           | 0,3691667          | 8,1522328 | 27,488034        | 64,359733        | 0,838941404                  |
| 54         | 12  | B        | 10        | 70,002           | 42,942497        | 43,232475         | 0,377499          | 86,329628        | 61,52             | -4,05            | 46,96            | 1                | 1                | 16,009           | 9,1              | 11,646738        | 6,833           | 0,4583333          | 9,7611497 | 22,869347        | 67,369504        | 0,879080227                  |
| 54         | 12  | B        | 11        | 66,422           | 44,474998        | 39,929668         | 0,397499          | 67,575203        | 64,96             | -1,95            | 54,89            |                  |                  | 16,828           | 9,17             | 12,479012        | 5,709           | 0,3908333          | 8,5950438 | 25,334979        | 66,069977        | 0,893758331                  |
| 54         | 12  | B        | 12        | 67,592           | 44,932503        | 47,135792         | 0,374992          | 71,315781        | 59,9              | -1,72            | 59,07            |                  |                  | 17,845           | 9,23             | 12,539012        | 6,609           | 0,4483333          | 9,7777844 | 26,401053        | 63,821162        | 0,834567351                  |
| 54         | 12  | B        | 13        | 59,638           | 42,489998        | 25,36729          | 0,307491          | 75,069244        |                   |                  |                  |                  |                  |                  | 9,17             | 12,981214        | 5,142           | 0,3716667          | 8,6220195 |                  |                  | 0,723678547                  |
| 54         | 12  | B        | 14        | 69,849           | 45,325005        | 47,285919         | 0,434994          | 71,30899         |                   |                  |                  |                  |                  |                  | 9,21             | 13,023214        | 6,187           | 0,4216667          | 8,8576787 |                  |                  | 0,959721902                  |
| 54         | 12  | B        | 15        | 65,896           | 45,43            | 40,380051         | 0,417496          | 97,580711        | 69,14             | -2,56            | 57,12            |                  |                  | 18,633           | 9,2              |                  | 5,555           | 0,3875             | 8,4299502 | 28,276375        | 63,293675        | 0,918987453                  |
